# Supplementary material for: The natural history of neurolymphomatosis
Source: PubMed Central journal article supplement (PMC11523968; doi:10.1038/s44276-024-00053-x), 2024-04-23
Supplement: 44276_2024_53_MOESM2_ESM.pdf [file 44276_2024_53_MOESM2_ESM.pdf]

**Supplemental Table 1:** Citations of articles included in chronological order (n=231).

1. Radnai B, Takacs-Nagy L. [Neurolymphomatosis in man]. *Orv Hetil* 1951;92(48):1559-62
2. Borit A, Altrocchi PH. Recurrent polyneuropathy and neurolymphomatosis. *Arch Neurol* 1971;24(1):40-9 doi: 10.1001/archneur.1971.00480310068006[published Online First: Epub Date]].
3. Trelles JO, Urquiaga C, Palomino L, Trelles L. [Human peripheral neurolymphomatosis (reticuloendothelial polyradiculoneuritis)]. *J Neurol Sci* 1976;28(2):187-202 doi: 10.1016/0022-510x(76)90102-7[published Online First: Epub Date]].
4. Guberman A, Rosenbaum H, Braciale T, Schlaepfer WW. Human neurolymphomatosis. *J Neurol Sci* 1978;36(1):1-12 doi: 10.1016/0022-510x(78)90157-0[published Online First: Epub Date]].
5. Trelles JO, Trelles L. [Human peripheral neurolymphomatosis]. *Rev Neurol (Paris)* 1983;139(12):703-14
6. Guberman A. Fatal peripheral neurolymphomatosis. *Neurology* 1984;34(2):259-60 doi: 10.1212/wnl.34.2.259-a[published Online First: Epub Date]].
7. Woimant F, Schanen A, Bertail MA, et al. [Myelopathy manifesting as macroglobulinemia]. *Ann Med Interne (Paris)* 1985;136(2):121-4
8. Kuroda Y, Nakata H, Kakigi R, Oda K, Shibasaki H, Nakashiro H. Human neurolymphomatosis by adult T-cell leukemia. *Neurology* 1989;39(1):144-6 doi: 10.1212/wnl.39.1.144[published Online First: Epub Date]].
9. Grisold W, Jellinger K, Lutz D. Human neurolymphomatosis in a patient with chronic lymphatic leukemia. *Clin Neuropathol* 1990;9(5):224-30
10. Diaz-Arrastia R, Younger DS, Hair L, et al. Neurolymphomatosis: a clinicopathologic syndrome re-emerges. *Neurology* 1992;42(6):1136-41 doi: 10.1212/wnl.42.6.1136[published Online First: Epub Date]].
11. van den Bent MJ, de Bruin HG, Beun GD, Vecht CJ. Neurolymphomatosis of the median nerve. *Neurology* 1995;45(7):1403-5 doi: 10.1212/wnl.45.7.1403[published Online First: Epub Date]].
12. Swarnkar A, Fukui MB, Fink DJ, Rao GR. MR imaging of brachial plexopathy in neurolymphomatosis. *AJR Am J Roentgenol* 1997;169(4):1189-90 doi: 10.2214/ajr.169.4.9308489[published Online First: Epub Date]].
13. Abad S, Zagdanski AM, Brechignac S, Thioliere B, Brouet JC, Mariette X. Neurolymphomatosis in Waldenstrom's macroglobulinaemia. *Br J Haematol* 1999;106(1):100-3 doi: 10.1046/j.1365-2141.1999.01482.x[published Online First: Epub Date]].
14. Bower SP, McKelvie P, Peppard RW, Roberts L. Neurolymphomatosis presenting as mononeuritis multiplex. *J Clin Neurosci* 1999;6(6):530-2 doi: 10.1016/s0967-5868(99)90020-6[published Online First: Epub Date]].
15. van den Bent MJ, de Bruin HG, Bos GM, Brutel de la Riviere G, Sillevs Smitt PA. Negative sural nerve biopsy in neurolymphomatosis. *J Neurol* 1999;246(12):1159-63 doi: 10.1007/s004150050535[published Online First: Epub Date]].
16. Carey MJ, Smith AG, Townsend JJ. Pathologic quiz case: progressive diffuse weakness after chemotherapy for large cell lymphoma in a middle-aged woman. Lymphomatous meningitis with neurolymphomatosis. *Arch Pathol Lab Med* 2000;124(4):645-6 doi: 10.5858/2000-124-0645-PQC[published Online First: Epub Date]].

17. Kuntzer T, Lobrinus JA, Janzer RC, Ghika J, Bogouslavsky J. Clinicopathological and molecular biological studies in a patient with neurolymphomatosis. *Muscle Nerve* 2000;23(10):1604-9 doi: 10.1002/1097-4598(200010)23:10<1604::aid-mus21>3.0.co;2-f[published Online First: Epub Date]].
18. Pietrangeli A, Milella M, De Marco S, et al. Brachial plexus neuropathy as unusual onset of diffuse neurolymphomatosis. *Neurol Sci* 2000;21(4):241-5 doi: 10.1007/s100720070083[published Online First: Epub Date]].
19. Quinones-Hinojosa A, Friedlander RM, Boyer PJ, Batchelor TT, Chiocca EA. Solitary sciatic nerve lymphoma as an initial manifestation of diffuse neurolymphomatosis. Case report and review of the literature. *J Neurosurg* 2000;92(1):165-9 doi: 10.3171/jns.2000.92.1.0165[published Online First: Epub Date]].
20. Moore KR, Blumenthal DT, Smith AG, Ward JH. Neurolymphomatosis of the lumbar plexus: high-resolution MR neurography findings. *Neurology* 2001;57(4):740-2 doi: 10.1212/wnl.57.4.740[published Online First: Epub Date]].
21. Odabasi Z, Parrott JH, Reddy VV, Oh SJ. Neurolymphomatosis associated with muscle and cerebral involvement caused by natural killer cell lymphoma: a case report and review of literature. *J Peripher Nerv Syst* 2001;6(4):197-203 doi: 10.1046/j.1529-8027.2001.01018.x[published Online First: Epub Date]].
22. Trojan A, Jermann M, Taverna C, Hany TF. Fusion PET-CT imaging of neurolymphomatosis. *Ann Oncol* 2002;13(5):802-5 doi: 10.1093/annonc/mdf057[published Online First: Epub Date]].
23. Baehring JM, Damek D, Martin EC, Betensky RA, Hochberg FH. Neurolymphomatosis. *Neuro Oncol* 2003;5(2):104-15 doi: 10.1093/neuonc/nop021[published Online First: Epub Date]].
24. Dakwar E, Teja S, Alleyne CH, Jr. Sciatic neurolymphomatosis. *Neurology* 2004;63(9):1751 doi: 10.1212/01.wnl.0000138501.06028.68[published Online First: Epub Date]].
25. Ghobrial IM, Buadi F, Spinner RJ, et al. High-dose intravenous methotrexate followed by autologous stem cell transplantation as a potentially effective therapy for neurolymphomatosis. *Cancer* 2004;100(11):2403-7 doi: 10.1002/cncr.20263[published Online First: Epub Date]].
26. Pages M, Marty-Double C, Pages AM. Sensory neuropathy as revealing symptom of neurolymphomatosis: report of a case with a 15-year duration. *Eur Neurol* 2004;52(1):57-8 doi: 10.1159/000079545[published Online First: Epub Date]].
27. Bi HY, Na J, Zang GM, Zhang W, Yuan Y. [Neurolymphomatosis, a case report]. *Beijing Da Xue Xue Bao Yi Xue Ban* 2005;37(3):331
28. Bokstein F, Goor O, Shihman B, et al. Assessment of neurolymphomatosis by brachial plexus biopsy and PET/CT. Report of a case. *J Neurooncol* 2005;72(2):163-7 doi: 10.1007/s11060-004-3389-0[published Online First: Epub Date]].
29. Kanter P, Zeidman A, Streifler J, et al. PET-CT imaging of combined brachial and lumbosacral neurolymphomatosis. *Eur J Haematol* 2005;74(1):66-9 doi: 10.1111/j.1600-0609.2004.00369.x[published Online First: Epub Date]].
30. Kim JH, Jang JH, Koh SB. A case of neurolymphomatosis involving cranial nerves: MRI and fusion PET-CT findings. *J Neurooncol* 2006;80(2):209-10 doi: 10.1007/s11060-006-9164-7[published Online First: Epub Date]].
31. Ozturk E, Arpaci F, Kocaoglu M, Arslan N, Bulakbasi N, Ozguven M. Detection of widespread neurolymphomatosis with 18F-FDG PET. *Eur J Nucl Med Mol Imaging* 2006;33(8):975-6 doi: 10.1007/s00259-006-0146-y[published Online First: Epub Date]].

32. Rosso SM, de Bruin HG, Wu KL, van den Bent MJ. Diagnosis of neurolymphomatosis with FDG PET. *Neurology* 2006;67(4):722-3 doi: 10.1212/01.wnl.0000230155.67464.37[published Online First: Epub Date]].
33. Strobel K, Pestalozzi B, Ciernik I, Schaefer NG, Koma AY, Hany TF. Changing PET/CT manifestation of neurolymphomatosis. *Eur J Nucl Med Mol Imaging* 2006;33(10):1244 doi: 10.1007/s00259-006-0112-8[published Online First: Epub Date]].
34. Grisold W, Klimpfnger M, Maehr B, et al. Peripheral nerve involvement in lymphoma: the meninges as the crucial barrier between meningoradicular spread and neurolymphomatosis. *J Peripher Nerv Syst* 2007;12(1):58-60 doi: 10.1111/j.1529-8027.2007.00120.x[published Online First: Epub Date]].
35. Hoshikawa Y, Oguri T, Hattori M, et al. [A case of neurolymphomatosis diagnosed with FDG-PET]. *Rinsho Shinkeigaku* 2007;47(7):437-40
36. Rahmani M, Birouk N, Amarti A, et al. [T-cell lymphoma revealed by a mononeuritis multiplex: case report and review of literature]. *Rev Neurol (Paris)* 2007;163(4):462-70 doi: 10.1016/s0035-3787(07)90422-1[published Online First: Epub Date]].
37. Shibata-Hamaguchi A, Samuraki M, Furui E, et al. B-cell neurolymphomatosis confined to the peripheral nervous system. *J Neurol Sci* 2007;260(1-2):249-52 doi: 10.1016/j.jns.2007.03.029[published Online First: Epub Date]].
38. Strobel K, Fischer K, Hany TF, Poryazova R, Jung HH. Sciatic nerve neurolymphomatosis - extent and therapy response assessment with PET/CT. *Clin Nucl Med* 2007;32(8):646-8 doi: 10.1097/RLU.0b013e3180a1ac74[published Online First: Epub Date]].
39. Tachibana T, Tomita N, Ueda T, et al. [Systemic neurolymphomatosis complicated in diffuse large B-cell lymphoma]. *Rinsho Ketsueki* 2007;48(12):1563-6
40. Yazawa S, Ohi T, Shiomi K, Takashima N, Kyoraku I, Nakazato M. Brachial plexus neurolymphomatosis: a discrepancy between electrophysiological and radiological findings. *Intern Med* 2007;46(8):533-4 doi: 10.2169/internalmedicine.46.6153[published Online First: Epub Date]].
41. Chaturvedi A, Singh JP, Rastogi V. MRI diagnosis of neurolymphomatosis of the brachial plexus. *Neurol India* 2008;56(4):485-6 doi: 10.4103/0028-3886.44817[published Online First: Epub Date]].
42. Czepczynski R, Guzikowska-Ruszkowska I, Sowinski J. Neurolymphomatosis detected by (18)F-FDG PET/CT scan - a case report. *Nucl Med Rev Cent East Eur* 2008;11(2):73-5
43. Dong Q, Wong KK, Avram AM. Sacral nerve root neurolymphomatosis diagnosed on FDG-PET/CT and magnetic resonance imaging. *Clin Nucl Med* 2008;33(1):30-1 doi: 10.1097/RLU.0b013e31815c5020[published Online First: Epub Date]].
44. Khong P, Pitham T, Owler B. Isolated neurolymphomatosis of the cauda equina and filum terminale: case report. *Spine (Phila Pa 1976)* 2008;33(21):E807-11 doi: 10.1097/BRS.0b013e31818441be[published Online First: Epub Date]].
45. Levin N, Soffer D, Grissaru S, Aizikovitch N, Gomori JM, Siegal T. Primary T-cell CNS lymphoma presenting with leptomeningeal spread and neurolymphomatosis. *J Neurooncol* 2008;90(1):77-83 doi: 10.1007/s11060-008-9633-2[published Online First: Epub Date]].
46. Lin M, Kilanowska J, Taper J, Chu J. Neurolymphomatosis--diagnosis and assessment of treatment response by FDG PET-CT. *Hematol Oncol* 2008;26(1):43-5 doi: 10.1002/hon.837[published Online First: Epub Date]].

47. Shima K, Ishida C, Okino S, Kotani T, Higashi K, Yamada M. A linear lesion along the brachial plexus on FDG-PET in neurolymphomatosis. *Intern Med* 2008;47(12):1159-60 doi: 10.2169/internalmedicine.47.1104[published Online First: Epub Date]].
48. Urban PP, Kaczmarek E, Wellach I, et al. [Neurolymphomatosis. Subacute sensorimotor polyneuropathy as a first sign of non-Hodgkin's B cell lymphoma]. *Nervenarzt* 2008;79(6):699-702 doi: 10.1007/s00115-008-2456-8[published Online First: Epub Date]].
49. Bezier M, Reguiat Z, Delaby P, et al. Neurolymphomatosis associated with Sezary syndrome. *Arch Dermatol* 2009;145(3):294-6 doi: 10.1001/archdermatol.2008.584[published Online First: Epub Date]].
50. Chamberlain MC, Fink J. Neurolymphomatosis: a rare metastatic complication of diffuse large B-Cell lymphoma. *J Neurooncol* 2009;95(2):285-88 doi: 10.1007/s11060-009-9918-0[published Online First: Epub Date]].
51. Duran C, Infante JR, Serrano J, et al. [Neurolymphomatosis: diagnosis of extension and assessment of response to treatment with PET-CT]. *Rev Esp Med Nucl* 2009;28(6):295-8 doi: 10.1016/j.rem.2009.07.002[published Online First: Epub Date]].
52. Hong RS, Woodson EA, Hansen MR. Neurolymphomatosis mimicking chemotherapy-induced ototoxicity. *Otol Neurotol* 2009;30(4):566-9 doi: 10.1097/MAO.0b013e3181a527b2[published Online First: Epub Date]].
53. Kosa SC, Peller PJ, Klein CJ. T-cell neurolymphomatosis involving cauda equina and sciatic nerves. *Neurology* 2009;72(1):98 doi: 10.1212/01.wnl.0000338598.07063.5b[published Online First: Epub Date]].
54. Nishio M, Tamaki T, Ochi H, Shibamoto Y. Intraspinal canal neurolymphomatosis detected by FDG-PET/CT. *Clin Nucl Med* 2009;34(9):610-2 doi: 10.1097/RLU.0b013e3181b06c76[published Online First: Epub Date]].
55. Peruzzi P, Ray-Chaudhuri A, Slone WH, Mekhjian HS, Porcu P, Chiocca E. Reversal of neurological deficit after chemotherapy in BCL-6-positive neurolymphomatosis. Case report. *J Neurosurg* 2009;111(2):247-51 doi: 10.3171/2008.11.JNS08291[published Online First: Epub Date]].
56. von Falck C, Rodt T, Joerdens S, et al. F-18 2-fluoro-2-deoxy-glucose positron emission tomography/computed tomography for the detection of radicular and peripheral neurolymphomatosis: correlation with magnetic resonance imaging and ultrasound. *Clin Nucl Med* 2009;34(8):493-5 doi: 10.1097/RLU.0b013e3181abb6ba[published Online First: Epub Date]].
57. Gan HK, Azad A, Cher L, Mitchell PL. Neurolymphomatosis: diagnosis, management, and outcomes in patients treated with rituximab. *Neuro Oncol* 2010;12(2):212-5 doi: 10.1093/neuonc/nop021[published Online First: Epub Date]].
58. Grisariu S, Avni B, Batchelor TT, et al. Neurolymphomatosis: an International Primary CNS Lymphoma Collaborative Group report. *Blood* 2010;115(24):5005-11 doi: 10.1182/blood-2009-12-258210[published Online First: Epub Date]].
59. Koyama T, O'Uchi T, Matsue K. Neurolymphomatosis involving the trigeminal nerve and deep peroneal nerve in a patient with relapsed intravascular large B-cell lymphoma. *Eur J Haematol* 2010;85(3):275-6 doi: 10.1111/j.1600-0609.2010.01477.x[published Online First: Epub Date]].
60. Miki M, Masaki Y, Nakamura T, et al. [Primary neurolymphomatosis of the cervical nerve root]. *Rinsho Ketsueki* 2010;51(7):564-7

61. Nishizawa M, Yamashita K, Nakamoto Y, Kotani S, Kondo T, Takaori-Kondo A. Neurolymphomatosis as a manifestation of relapsed primary cardiac lymphoma. *Int J Hematol* 2010;92(5):679-80 doi: 10.1007/s12185-010-0716-4[published Online First: Epub Date]].
62. Santos E, Scolding NJ. Neurolymphomatosis mimicking neurosarcoidosis: a case report. *J Med Case Rep* 2010;4:5 doi: 10.1186/1752-1947-4-5[published Online First: Epub Date]].
63. Ye BS, Sunwoo IN, Suh BC, Park JP, Shim DS, Kim SM. Diffuse large B-cell lymphoma presenting as piriformis syndrome. *Muscle Nerve* 2010;41(3):419-22 doi: 10.1002/mus.21538[published Online First: Epub Date]].
64. Cassereau J, Letournel F, Francois S, Dubas F, Nicolas G. Chronic inflammatory demyelinating polyneuropathy in Waldenstrom's macroglobulinemia. *Rev Neurol (Paris)* 2011;167(4):343-7 doi: 10.1016/j.neurol.2010.10.015[published Online First: Epub Date]].
65. Hong CM, Lee SW, Lee HJ, et al. Neurolymphomatosis on F-18 FDG PET/CT and MRI Findings: A Case Report. *Nucl Med Mol Imaging* 2011;45(1):76-8 doi: 10.1007/s13139-010-0070-8[published Online First: Epub Date]].
66. Hung MH, Gau JP. Relapsed testicular lymphoma presenting with cranial nerve neurolymphomatosis. *Neurology* 2011;76(16):1441 doi: 10.1212/WNL.0b013e318216711a[published Online First: Epub Date]].
67. Matsue K, Hayama BY, Iwama K, et al. High frequency of neurolymphomatosis as a relapse disease of intravascular large B-cell lymphoma. *Cancer* 2011;117(19):4512-21 doi: 10.1002/ncr.26090[published Online First: Epub Date]].
68. Suga K, Yasuhiko K, Matsunaga N, Yujiri T, Nakazora T, Ariyoshi K. F-18 FDG PET/CT findings of a case of sacral nerve root neurolymphomatosis that occurred during chemotherapy. *Clin Nucl Med* 2011;36(1):73-6 doi: 10.1097/RLU.0b013e3181f4a03f[published Online First: Epub Date]].
69. Talanow R, Shrikanthan S. Value of FDG PET in the evaluation of therapy response in nerve root neurolymphomatosis. *Clin Nucl Med* 2011;36(5):389-91 doi: 10.1097/RLU.0b013e31820a9fab[published Online First: Epub Date]].
70. Casselberry JN, Kritz AD. Neurolymphomatosis: a case study of diffuse large B-cell lymphoma. *Clin J Oncol Nurs* 2012;16(6):636-7 doi: 10.1188/12.CJON.636-637[published Online First: Epub Date]].
71. Cheung C, Lopes D, Hung KN, Chan T, Chan KW, Kwong YL. Neurolymphomatosis: role of positron emission tomography in diagnosis. *Ann Hematol* 2012;91(8):1313-4 doi: 10.1007/s00277-011-1379-9[published Online First: Epub Date]].
72. D'Amico A, Napoli M, Cirillo M, et al. Imaging of cervical extradural en-plaque meningioma. A case report. *Neuroradiol J* 2012;25(5):598-603 doi: 10.1177/197140091202500514[published Online First: Epub Date]].
73. Gs B, J G, S LAM, et al. Bilateral vagus nerve neurolymphomatosis diagnosed using PET/CT and diffusion-weighted MRI. *Clin Nucl Med* 2012;37(9):e225-8 doi: 10.1097/RLU.0b013e318251e474[published Online First: Epub Date]].
74. Harada N, Tomita M, Kimura A, et al. [Case report; Two cases of neurolymphomatosis as a manifestation of relapsed non-Hodgkin lymphoma]. *Nihon Naika Gakkai Zasshi* 2012;101(1):157-60 doi: 10.2169/naika.101.157[published Online First: Epub Date]].
75. Pentsova E, Rosenblum M, Holodny A, Palomba ML, Omuro A. Chemotherapy-related magnetic resonance imaging abnormalities mimicking disease progression following intraventricular

- liposomal cytarabine and high dose methotrexate for neurolymphomatosis. *Leuk Lymphoma* 2012;53(8):1620-2 doi: 10.3109/10428194.2012.656632[published Online First: Epub Date]].
76. Sugai A, Konno T, Yano T, Umeda M, Oyake M, Fujita N. [Neurolymphomatosis presenting as bilateral tongue atrophy: a case report]. *Rinsho Shinkeigaku* 2012;52(8):589-91 doi: 10.5692/clinicalneuro.52.589[published Online First: Epub Date]].
  77. Tsang HH, Lee EY, Anthony MP, Khong PL. 18F-FDG PET/CT diagnosis of vagus nerve neurolymphomatosis. *Clin Nucl Med* 2012;37(9):897-8 doi: 10.1097/RLU.0b013e31825b2042[published Online First: Epub Date]].
  78. Vecchio D, Mittino D, Terazzi E, Nassi L, Conconi A, Monaco F. A case of cranial multinevritis: from the onset to the diagnosis of primary neurolymphomatosis. *BMJ Case Rep* 2012;2012 doi: 10.1136/bcr.06.2011.4299[published Online First: Epub Date]].
  79. Wan MY, Ardeshtna KM, Bomanji J. Neurolymphomatosis in a patient with lymphoblastic lymphoma. *Br J Haematol* 2012;156(6):691 doi: 10.1111/j.1365-2141.2011.09002.x[published Online First: Epub Date]].
  80. Xu L, Zhou Y, Qiu D, Shams S. Fusion PET-CT detection of neurolymphomatosis originating from primary breast lymphoma: A case report and literature review. *Oncol Lett* 2012;4(5):973-75 doi: 10.3892/ol.2012.840[published Online First: Epub Date]].
  81. Yamada S, Tanimoto A, Nabeshima A, et al. Diffuse large B-cell lymphoma presenting with neurolymphomatosis and intravascular lymphoma: a unique autopsy case with diverse neurological symptoms. *Diagn Pathol* 2012;7:94 doi: 10.1186/1746-1596-7-94[published Online First: Epub Date]].
  82. Blioskas S, Tsaligopoulos M, Kyriafinis G, et al. Bilateral secondary neurolymphomatosis of the internal auditory canal nerves: a case report. *Am J Otolaryngol* 2013;34(5):556-8 doi: 10.1016/j.amjoto.2013.04.002[published Online First: Epub Date]].
  83. Choi YJ, Shin JA, Kim YH, et al. Neurolymphomatosis of Brachial Plexus in Patients with Non-Hodgkin's Lymphoma. *Case Rep Oncol Med* 2013;2013:492329 doi: 10.1155/2013/492329[published Online First: Epub Date]].
  84. Hanna R, Di Primio GA, Schweitzer M, Torres C, Sheikh A, Chakraborty S. Progressive neurolymphomatosis with cutaneous disease: response in a patient with mycosis fungoides. *Skeletal Radiol* 2013;42(7):1011-5 doi: 10.1007/s00256-013-1595-6[published Online First: Epub Date]].
  85. Okada M, Takamatsu K, Oebisu N, Nakamura H. Solitary neurolymphomatosis of the brachial plexus mimicking benign nerve sheath tumour: case report. *Br J Neurosurg* 2013;27(3):386-7 doi: 10.3109/02688697.2012.737959[published Online First: Epub Date]].
  86. Ramirez-Zamora A, Morales-Vidal S, Chawla J, Biller J. Autopsy proven peripheral nervous system neurolymphomatosis despite negative bilateral sural nerve biopsy. *Front Neurol* 2013;4:197 doi: 10.3389/fneur.2013.00197[published Online First: Epub Date]].
  87. Salm LP, Van der Hiel B, Stokkel MP. Neurolymphomatosis diagnosed by (18)F-FDG PET-CT. *Clin Nucl Med* 2013;38(6):e261-2 doi: 10.1097/RLU.0b013e318266ce70[published Online First: Epub Date]].
  88. Tanaka H, Yoshino K, Sakaida E, et al. Secondary neurolymphomatosis detected by whole-body diffusion-weighted magnetic resonance imaging: a case report. *J Clin Exp Hematop* 2013;53(3):221-6 doi: 10.3960/jslrt.53.221[published Online First: Epub Date]].

89. Toledano M, Siddiqui MA, Thompson CA, Garza I, Pittock SJ. Teaching NeuroImages: diagnostic utility of FDG-PET in neurolymphomatosis. *Neurology* 2013;81(1):e3 doi: 10.1212/WNL.0b013e318297eef5[published Online First: Epub Date]].
90. Tomita M, Koike H, Kawagashira Y, et al. Clinicopathological features of neuropathy associated with lymphoma. *Brain* 2013;136(Pt 8):2563-78 doi: 10.1093/brain/awt193[published Online First: Epub Date]].
91. Akagi A, Ono K, Hamaguchi T, et al. Neurolymphomatosis exhibiting repeated exacerbation and remission in both the peripheral and central nervous systems. *J Neurol Sci* 2014;345(1-2):267-8 doi: 10.1016/j.jns.2014.07.038[published Online First: Epub Date]].
92. Canh NX, Tan NV, Tung TT, Son NT, Maurea S. (18)F-FDG PET/CT in Neurolymphomatosis: Report of 3 Cases. *Asia Ocean J Nucl Med Biol* 2014;2(1):57-64
93. Del Grande A, Sabatelli M, Luigetti M, et al. Primary multifocal lymphoma of peripheral nervous system: case report and review of the literature. *Muscle Nerve* 2014;50(6):1016-22 doi: 10.1002/mus.24354[published Online First: Epub Date]].
94. Jung YH, Woo IS, Han DJ, Han CW. (18)F-fluoro-2-deoxy-D-glucose positron emission tomography findings of neurolymphomatosis. *Blood Res* 2014;49(2):83 doi: 10.5045/br.2014.49.2.83[published Online First: Epub Date]].
95. Kajary K, Molnar Z, Miko I, Barsi P, Lengyel Z, Szakall S, Jr. Neurolymphomatosis as a late relapse of non-Hodgkin's lymphoma detected by 18F-FDG PET/CT: a case report. *Rev Esp Med Nucl Imagen Mol* 2014;33(1):39-42 doi: 10.1016/j.remnm.2013.03.004[published Online First: Epub Date]].
96. Kamiya-Matsuoka C, Shroff S, Gildersleeve K, Hormozdi B, Manning JT, Woodman KH. Neurolymphomatosis: a case series of clinical manifestations, treatments, and outcomes. *J Neurol Sci* 2014;343(1-2):144-8 doi: 10.1016/j.jns.2014.05.058[published Online First: Epub Date]].
97. Lagarde S, Tabouret E, Matta M, et al. Primary neurolymphomatosis diagnosis and treatment: a retrospective study. *J Neurol Sci* 2014;342(1-2):178-81 doi: 10.1016/j.jns.2014.04.030[published Online First: Epub Date]].
98. Ogawa S, Fukunaga A, Kanata M, et al. Neurolymphomatosis associated with erythrodermic mycosis fungoides. *Acta Derm Venereol* 2014;94(2):227-8 doi: 10.2340/00015555-1684[published Online First: Epub Date]].
99. Padma S, Sundaram PS, Praveen Kumar SL. Primary peripheral neurolymphomatosis mimicking synovial sarcoma: FDG PETCT to the rescue. *J Cancer Res Ther* 2014;10(3):726-9 doi: 10.4103/0973-1482.136038[published Online First: Epub Date]].
100. Peterson J, Caliskan B, Bonyadlou S. Positron emission tomography/computerized tomography imaging of multiple focus of neurolymphomatosis. *Indian J Nucl Med* 2014;29(4):252-3 doi: 10.4103/0972-3919.142632[published Online First: Epub Date]].
101. Ramirez Ocana D, Gutierrez Cardo AL, Gonzalez Diaz L, Hurst K, Espeso de Haro M. [Neurolymphomatosis as initial manifestation of recurrence in lymphoma]. *Rev Esp Med Nucl Imagen Mol* 2014;33(1):50-1 doi: 10.1016/j.remnm.2013.02.003[published Online First: Epub Date]].
102. Sakai N, Ito-Yamashita T, Takahashi G, et al. Primary neurolymphomatosis of the lower cranial nerves presenting as Dysphagia and hoarseness: a case report. *J Neurol Surg Rep* 2014;75(1):e62-6 doi: 10.1055/s-0033-1363505[published Online First: Epub Date]].

103. Shimizu I, Hamano Y, Sato S, et al. Neurolymphomatosis in a patient with extranodal NK/T-cell lymphoma, nasal-type: a case report and literature review. *Intern Med* 2014;53(5):471-5 doi: 10.2169/internalmedicine.53.0262[published Online First: Epub Date]].
104. Tabuchi S, Yoshioka H, Nakayasu H, Watanabe T. Primary Central Nervous System Lymphoma of the Cerebellopontine Angle That Initially Occurred as Neurolymphomatosis of the Acoustic Nerve. *NMC Case Rep J* 2014;1(1):28-32 doi: 10.2176/nmccrj.2013-0353[published Online First: Epub Date]].
105. Yilmaz S, Sager S, Sen F, Halac M. Bilateral trigeminal nerve recurrence of non-hodgkin lymphoma revealed with FDG PET/CT. *Indian J Nucl Med* 2014;29(1):50-2 doi: 10.4103/0972-3919.125778[published Online First: Epub Date]].
106. Zhou WL, Wu HB, Weng CS, et al. Usefulness of 18F-FDG PET/CT in the detection of neurolymphomatosis. *Nucl Med Commun* 2014;35(11):1107-11 doi: 10.1097/MNM.000000000000181[published Online First: Epub Date]].
107. Advani P, Jiang L, Srinivasan S, Foran J. Disseminated extranodal marginal zone lymphoma involving the gastrocnemius muscle with sural neurolymphomatosis. *Ann Hematol* 2015;94(11):1939-40 doi: 10.1007/s00277-015-2453-5[published Online First: Epub Date]].
108. Advani P, Paulus A, Murray P, et al. A rare case of primary high-grade large B-cell lymphoma of the sciatic nerve. *Clin Lymphoma Myeloma Leuk* 2015;15(6):e117-20 doi: 10.1016/j.clml.2014.12.001[published Online First: Epub Date]].
109. Biswal CK, Mittal BR, Shukla J, Vatsa R, Bhattacharya A, Prabhakar S. Fluorothymidine PET/CT in neurolymphomatosis. *Clin Nucl Med* 2015;40(5):e290-2 doi: 10.1097/RLU.0000000000000632[published Online First: Epub Date]].
110. Brandstadter R, Brody J, Morgello S, et al. Primary Neurolymphomatosis Presenting With Polyradiculoneuropathy Affecting One Lower Limb. *J Clin Neuromuscul Dis* 2015;17(1):6-12 doi: 10.1097/CND.000000000000088[published Online First: Epub Date]].
111. Ebihara Y, Ishii N, Akizuki K, et al. [A case of neurolymphomatosis: peripheral neuropathy induced by diffuse large B-cell lymphoma without any abnormal accumulation observed on early positron emission tomography-computed tomography]. *Brain Nerve* 2015;67(2):219-23 doi: 10.11477/mf.1416200116[published Online First: Epub Date]].
112. Gutierrez-Martinez AJ, Malo-de-Molina R, Garcia-Garcia N. [Multiple cranial neuropathy as a manifestation of primary neurolymphomatosis]. *Rev Neurol* 2015;61(8):381-3
113. Lahoria R, Dyck PJ, Macon WR, et al. Neurolymphomatosis: A report of 2 cases representing opposite ends of the clinical spectrum. *Muscle Nerve* 2015;52(3):449-54 doi: 10.1002/mus.24646[published Online First: Epub Date]].
114. Liu Z, Jiang T, Hou N, Jia Y. Peripheral neurolymphomatosis with tracheal asphyxia: a case report and literature review. *BMC Neurol* 2015;15:149 doi: 10.1186/s12883-015-0405-2[published Online First: Epub Date]].
115. Sato M, Furuta M, Hirayanagi K, Nagamine S, Makioka K, Ikeda Y. [A case of neurolymphomatosis presenting extended involvement of spinal nerve roots]. *Rinsho Shinkeigaku* 2015;55(5):333-8 doi: 10.5692/clinicalneuro.15-000615[published Online First: Epub Date]].
116. Shaikh F, Chan AC, Awan O, et al. Diagnostic Yield of FDG-PET/CT, MRI, and CSF Cytology in Non-Biopsiable Neurolymphomatosis as a Herald Sign of Recurrent Non-Hodgkin's Lymphoma. *Cureus* 2015;7(9):e319 doi: 10.7759/cureus.319[published Online First: Epub Date]].



117. Shaikh F, Savells D, Awan O, et al. Quantitative Imaging Analysis of FDG PET/CT Imaging for Detection of Central Neurolymphomatosis in a Case of Recurrent Diffuse B-Cell Lymphoma. *Cureus* 2015;7(11):e379 doi: 10.7759/cureus.379[published Online First: Epub Date]].
118. Sunami Y, Gotoh A, Hamano Y, et al. Various neurological symptoms by neurolymphomatosis as the initial presentation of primary testicular lymphoma. *Case Rep Oncol* 2015;8(1):200-4 doi: 10.1159/000381874[published Online First: Epub Date]].
119. Tong AK, Neo SH, Kok TY. Disseminated Lymphoma Evolving into Neurolymphomatosis during Mid-cycle of Chemotherapy Detected by (18)F-FDG PET/CT. *Ann Acad Med Singap* 2015;44(11):545-7
120. Tsai HH, Chen YF, Hsieh ST, Chao CC. Neurological picture. Neurolymphomatosis as the primary presentation of non-Hodgkin's Lymphoma. *J Neurol Neurosurg Psychiatry* 2015;86(8):929-30 doi: 10.1136/jnnp-2014-308244[published Online First: Epub Date]].
121. Vijayan J, Chan YC, Therimadasamy A, Wilder-Smith EP. Role of combined B-mode and Doppler sonography in evaluating neurolymphomatosis. *Neurology* 2015;85(9):752-5 doi: 10.1212/WNL.0000000000001880[published Online First: Epub Date]].
122. Wang Y, Wang J, Jiang C, Peng Q, Wu M, Ma X. Secondary neurolymphomatosis of spinal nerve roots detected by (1)(8)F-FDG PET/CT: a case report and differential diagnosis of the case. *Hell J Nucl Med* 2015;18(3):261-3 doi: 10.1967/s002449910309[published Online First: Epub Date]].
123. Bruce D, Eagleton H, Subesinghe M. Diagnostic and response assessment FDG PET-CT in neurolymphomatosis. *Clin Case Rep* 2016;4(12):1172-74 doi: 10.1002/ccr3.734[published Online First: Epub Date]].
124. de Jong A, Mous R, van Dongen GA, Hoekstra OS, Nievelstein RA, de Keizer B. (89) Zr-rituximab PET/CT to detect neurolymphomatosis. *Am J Hematol* 2016;91(6):649-50 doi: 10.1002/ajh.24328[published Online First: Epub Date]].
125. Denays R, Baudrez V, Abouhamad P, Dereme T, Milbouw G, Hermanne JP. Plexiform neurolymphomatosis. *Rev Neurol (Paris)* 2016;172(4-5):328-30 doi: 10.1016/j.neurol.2016.02.008[published Online First: Epub Date]].
126. Gammon B, Gammon BR, Kim YH, Kim J. Neurotropic Gamma-Delta T-Cell Lymphoma With CD30-Positive Lymphoid Infiltrates. *Am J Dermatopathol* 2016;38(9):e133-6 doi: 10.1097/DAD.0000000000000560[published Online First: Epub Date]].
127. Gykiere P, Jans L, Degrieck B, Goethals I. Neurolymphomatosis on 18F-FDG PET/CT: Diagnosis and Therapy Response. *Clin Nucl Med* 2016;41(2):142-3 doi: 10.1097/RLU.0000000000000982[published Online First: Epub Date]].
128. He W, Wang W, Gustas C, Malysz J, Kaur D. Isolated sciatic neuropathy as an initial manifestation of a high grade B-cell lymphoma: A case report and literature review. *Clin Neurol Neurosurg* 2016;149:147-53 doi: 10.1016/j.clineuro.2016.07.029[published Online First: Epub Date]].
129. Kinoshita H, Yamakado H, Kitano T, et al. Diagnostic utility of FDG-PET in neurolymphomatosis: report of five cases. *J Neurol* 2016;263(9):1719-26 doi: 10.1007/s00415-016-8190-4[published Online First: Epub Date]].
130. Lim AT, Clucas D, Khoo C, Parameswaran BK, Lau E. Neurolymphomatosis: MRI and (18) FDG-PET features. *J Med Imaging Radiat Oncol* 2016;60(1):92-5 doi: 10.1111/1754-9485.12321[published Online First: Epub Date]].

131. Oner AO, Okuyucu K, Alagoz E, Battal B, Arslan N. An Extremely Rare Intersection: Neurolymphomatosis in a Patient with Burkitt Lymphoma Detected by 18F-Fluorodeoxyglucose Positron Emission Tomography/Computed Tomography. *World J Nucl Med* 2016;15(3):209-11 doi: 10.4103/1450-1147.172304[published Online First: Epub Date]].
132. Pham M, Awad M. Lymphoma relapse presenting as neurolymphomatosis. *Asian J Neurosurg* 2016;11(1):73 doi: 10.4103/1793-5482.165783[published Online First: Epub Date]].
133. Scharf EL, Hanson CA, Howard MT, Keegan BM. Serial cerebrospinal fluid examinations to diagnose hematological malignancy causing neurological disease. *J Neurooncol* 2016;129(1):77-83 doi: 10.1007/s11060-016-2140-y[published Online First: Epub Date]].
134. Shree R, Goyal MK, Modi M, et al. The Diagnostic Dilemma of Neurolymphomatosis. *J Clin Neurol* 2016;12(3):274-81 doi: 10.3988/jcn.2016.12.3.274[published Online First: Epub Date]].
135. Sideras PA, Matthews J, Sakib SM, Ofikwu F, Spektor V. Neurolymphomatosis of the peripheral nervous system: a case report and review of the literature. *Clin Imaging* 2016;40(6):1253-56 doi: 10.1016/j.clinimag.2016.08.014[published Online First: Epub Date]].
136. Umeda M, Kondo T, Nishikori M, et al. A case of neurolymphomatosis caused by follicular lymphoma successfully treated with bendamustine. *Clin Case Rep* 2016;4(1):23-5 doi: 10.1002/ccr3.436[published Online First: Epub Date]].
137. Usami M, Murase K, Takada K, et al. [Neurolymphomatosis of the sciatic nerve diagnosed by FDG-PET/CT]. *Rinsho Ketsueki* 2016;57(1):52-5 doi: 10.11406/rinketsu.57.52[published Online First: Epub Date]].
138. Yu Y, Ren M, Qi X. Pathologically proven peripheral neurolymphomatosis. *Neurol India* 2016;64(4):805-7 doi: 10.4103/0028-3886.185354[published Online First: Epub Date]].
139. Yu YX, Liu JY, Yao S. [Diffuse large B-cell lymphoma presenting with neurolymphomatosis: a case report]. *Zhonghua Nei Ke Za Zhi* 2016;55(9):722-3 doi: 10.3760/cma.j.issn.0578-1426.2016.09.014[published Online First: Epub Date]].
140. Briani C, Visentin A, Cavallaro T, et al. Primary neurolymphomatosis as clinical onset of chronic lymphocytic leukemia. *Ann Hematol* 2017;96(1):159-61 doi: 10.1007/s00277-016-2852-2[published Online First: Epub Date]].
141. Bund C, Heimburger C, Trens P, Fohrer C, Kremer S, Namer IJ. FDG PET to Diagnose Neurolymphomatosis in a Case of Triple-Hit B-Cell Lymphoma. *Clin Nucl Med* 2017;42(6):458-60 doi: 10.1097/RLU.0000000000001608[published Online First: Epub Date]].
142. Byun JM, Kim KH, Kim M, et al. Diagnosis of secondary peripheral neurolymphomatosis: a multi-center experience. *Leuk Lymphoma* 2017;58(11):2624-32 doi: 10.1080/10428194.2017.1312376[published Online First: Epub Date]].
143. Chang GY. Evolution of Neurolymphomatosis to Lymphomatosis Cerebri. *J Clin Neurol* 2017;13(2):203-04 doi: 10.3988/jcn.2017.13.2.203[published Online First: Epub Date]].
144. de Vaugelade C, de Clermont-Gallerande H, Meyer M, et al. FDG PET/CT in Pediatric Neurolymphomatosis. *Clin Nucl Med* 2017;42(5):e255-e57 doi: 10.1097/RLU.0000000000001624[published Online First: Epub Date]].
145. Foo TL, Yak R, Puhaindran ME. Peripheral Nerve Lymphomatosis. *J Hand Surg Asian Pac Vol* 2017;22(1):104-07 doi: 10.1142/S0218810417720042[published Online First: Epub Date]].
146. Gorospe L, Gallego-Rivera JI, Rioja-Martin ME, Chinea-Rodriguez A. Bilateral sciatic nerve neurolymphomatosis: PET/CT findings. *Ann Hematol* 2017;96(6):1059-60 doi: 10.1007/s00277-017-2988-8[published Online First: Epub Date]].

147. Groth CL, Nevel KS, Gwathmey KG, Bafakih F, Jones DE. Splenic marginal zone lymphoma: An indolent malignancy leading to the development of neurolymphomatosis. *Muscle Nerve* 2017;55(3):440-44 doi: 10.1002/mus.25404[published Online First: Epub Date]].
148. Kaulen LD, Foss FM, Fulbright RK, Huttner A, Baehring JM. Neurolymphomatosis of the thoracic sympathetic chain. *Neurology* 2017;89(18):1926-27 doi: 10.1212/WNL.0000000000004600[published Online First: Epub Date]].
149. Khader A, Vineetha M, George M, Manakkad SP, Balakrishnan S, Rajan U. Neurolymphomatosis in Primary Cutaneous CD4+ Pleomorphic Small/Medium-sized T-cell Lymphoma Mimicking Hansen's Disease. *Indian J Dermatol* 2017;62(3):315-17 doi: 10.4103/ijd.IJD\_553\_16[published Online First: Epub Date]].
150. Khandelwal S, Saxena S, Hansalia DJ. Neurolymphomatosis: A Surreal Presentation of Lymphoma. *Indian J Med Paediatr Oncol* 2017;38(3):287-90 doi: 10.4103/ijmpo.ijmpo\_151\_16[published Online First: Epub Date]].
151. Laumonerie P, Capek S, Amrami KK, Dyck PJ, Spinner RJ. Targeted fascicular biopsy of the brachial plexus: rationale and operative technique. *Neurosurg Focus* 2017;42(3):E9 doi: 10.3171/2017.1.FOCUS16404[published Online First: Epub Date]].
152. Le Guennec L, Maisonobe T, Choquet S, et al. Neurolymphomatosis as a relapse of primary cerebral nervous system lymphoma. *Leuk Lymphoma* 2017;58(3):729-31 doi: 10.1080/10428194.2016.1211277[published Online First: Epub Date]].
153. Noda Y, Sekiguchi K, Tokuoka H, et al. Ultrasonographic findings of proximal median neuropathy: A case series of suspected distal neuralgic amyotrophy. *J Neurol Sci* 2017;377:1-5 doi: 10.1016/j.jns.2017.03.037[published Online First: Epub Date]].
154. Ono Y, Kazuma Y, Ochi Y, Matsuoka R, Imai Y, Ishikawa T. Two Cases of Neurolymphomatosis with Fatal Bilateral Vocal Cord Paralysis that were Diagnosed with (18)F-fluorodeoxyglucose Positron Emission Tomography (FDG PET)/CT. *Intern Med* 2017;56(10):1193-98 doi: 10.2169/internalmedicine.56.6998[published Online First: Epub Date]].
155. Tanimizu M, Kobayashi K. Neurolymphomatosis Appeared Following Primary Central Nervous System Lymphoma. *Intern Med* 2017;56(4):463-64 doi: 10.2169/internalmedicine.56.7238[published Online First: Epub Date]].
156. Trevisan AC, Ribeiro FB, Itikawa EN, et al. 18F-FDG PET/CT/MRI Fusion Images Showing Cranial and Peripheral Nerve Involvement in Neurolymphomatosis. *Indian J Nucl Med* 2017;32(1):77-78 doi: 10.4103/0972-3919.198502[published Online First: Epub Date]].
157. Yi FF, Luo SS, Zhu WH, Zhao CB. Neurolymphomatosis Caused by Nasal-type Extranodal Natural Killer/T-cell Lymphoma. *Chin Med J (Engl)* 2017;130(5):625-26 doi: 10.4103/0366-6999.200547[published Online First: Epub Date]].
158. Asanome A, Kano K, Takahashi K, Saito T, Sawada J, Katayama T. [A case of neurolymphomatosis that was diagnosed by acoustic nerve biopsy]. *Rinsho Shinkeigaku* 2018;58(2):93-99 doi: 10.5692/clinicalneuro.001080[published Online First: Epub Date]].
159. Awis Qarni F, Tai E, Wh WH, Husin A. Homonymous Hemianopia: A Rare Presentation of Secondary Central Nervous System Neurolymphomatosis. *Cureus* 2018;10(5):e2708 doi: 10.7759/cureus.2708[published Online First: Epub Date]].
160. Bjornard KL, Leventaki V, Nichols KE, Sandlund JT, Prockop S, Ehrhardt MJ. Two-year-old female with EBV-positive diffuse large B-cell lymphoma and subsequent CNS involvement with

- neurolymphomatosis. *Pediatr Blood Cancer* 2018;65(12):e27415 doi: 10.1002/pbc.27415[published Online First: Epub Date]].
161. Bourque PR, Warman Chardon J, Bryanton M, Toupin M, Burns BF, Torres C. Neurolymphomatosis of the Brachial Plexus and its Branches: Case Series and Literature Review. *Can J Neurol Sci* 2018;45(2):137-43 doi: 10.1017/cjn.2017.282[published Online First: Epub Date]].
  162. Brand C, Pala A, Scheuerle A, et al. [Neurolymphomatosis : Two case reports]. *Nervenarzt* 2018;89(6):701-04 doi: 10.1007/s00115-017-0460-6[published Online First: Epub Date]].
  163. Daher A, Kamiya-Matsuoka C, Woodman K. Patient With 2 Hematologic Malignancies Presenting as Neurolymphomatosis. *J Clin Neuromuscul Dis* 2018;19(3):124-30 doi: 10.1097/CND.000000000000183[published Online First: Epub Date]].
  164. Davidson T, Kedmi M, Avigdor A, et al. FDG PET-CT evaluation in neurolymphomatosis: imaging characteristics and clinical outcomes. *Leuk Lymphoma* 2018;59(2):348-56 doi: 10.1080/10428194.2017.1352096[published Online First: Epub Date]].
  165. Duchesne M, Roussellet O, Maisonobe T, et al. Pathology of Nerve Biopsy and Diagnostic Yield of PCR-Based Clonality Testing in Neurolymphomatosis. *J Neuropathol Exp Neurol* 2018;77(9):769-81 doi: 10.1093/jnen/nly055[published Online First: Epub Date]].
  166. Haydaroglu Sahin H, Mete A, Pehlivan M. Neurolymphomatosis in non-Hodgkin lymphoma with cranial multineuritis: A case report. *Medicine (Baltimore)* 2018;97(15):e0303 doi: 10.1097/MD.0000000000010303[published Online First: Epub Date]].
  167. Jimenez Zapata HD, Rojas Medina LM, Carrasco Moro R, Martinez Rodrigo A, Garcia-Cosio Piqueras M. Cauda equina syndrome secondary to neurolymphomatosis: Case report and literature review. *Neurocirugia (Astur : Engl Ed)* 2018;29(3):138-42 doi: 10.1016/j.neucir.2017.07.001[published Online First: Epub Date]].
  168. Kobayashi M, Sakai Y, Kariya Y, et al. First pathological report of a de novo CD5-positive diffuse large B-cell lymphoma patient presenting with Guillain-Barre syndrome-like neuropathy due to neurolymphomatosis. *Neuropathology* 2018 doi: 10.1111/neup.12470[published Online First: Epub Date]].
  169. Konishi H, Taguchi Y, Yamamoto M, Nukui T, Dougu N, Nakatsuji Y. [A case of neurolymphomatosis presented as cauda equine syndrome accompanied with M-proteinemia]. *Rinsho Shinkeigaku* 2018;58(4):223-28 doi: 10.5692/clinicalneuro.1001079[published Online First: Epub Date]].
  170. Liu KC, Hennessey MA, McCall CM, Proia AD. Ocular involvement in neurolymphomatosis. *Am J Ophthalmol Case Rep* 2018;10:148-51 doi: 10.1016/j.ajoc.2018.02.023[published Online First: Epub Date]].
  171. Mahmoud RA, Abrams CK. Acute demyelinating neuropathy in a patient with neurolymphomatosis. *BMJ Case Rep* 2018;2018 doi: 10.1136/bcr-2017-222814[published Online First: Epub Date]].
  172. Mustafa R, Klein CJ, Martinez-Thompson J, et al. Recurrent Brachial Neuritis Attacks in Presentation of B-Cell Lymphoma. *Mayo Clin Proc Innov Qual Outcomes* 2018;2(4):382-86 doi: 10.1016/j.mayocpiqo.2018.10.002[published Online First: Epub Date]].
  173. Park HJ, Shin HY, Kim SH, et al. Partial Conduction Block as an Early Nerve Conduction Finding in Neurolymphomatosis. *J Clin Neurol* 2018;14(1):73-80 doi: 10.3988/jcn.2018.14.1.73[published Online First: Epub Date]].

174. Phang I, Craig-McQuaide A, Kinch K, Taylor W. Burkitt's neurolymphomatosis of the trigeminal nerve. *BMJ Case Rep* 2018;2018 doi: 10.1136/bcr-2018-225958[published Online First: Epub Date]].
175. Roy SG, Parida GK, Tripathy S, Das CJ, Kumar R. Active Leprosy Neuritis Detected on FDG PET/CT. *Clin Nucl Med* 2018;43(2):132-33 doi: 10.1097/RLU.0000000000001946[published Online First: Epub Date]].
176. Sasaki R, Ohta Y, Yamada Y, et al. Neurolymphomatosis in the Cauda Equina Diagnosed by an Open Biopsy. *Intern Med* 2018;57(23):3463-65 doi: 10.2169/internalmedicine.1049-18[published Online First: Epub Date]].
177. Schuster NM, Volney SJ, Kamdar MM. Sciatic Lymphoma Mimicking Lumbar Radiculopathy. *Pain Med* 2018;19(10):2091-92 doi: 10.1093/pm/pny153[published Online First: Epub Date]].
178. Uematsu N, Sumi M, Kaiume H, et al. [Neurolymphomatosis due to enteropathy-associated T-cell lymphoma clinically diagnosed by FDG-PET/CT and subsequently confirmed by autopsy]. *Rinsho Ketsueki* 2018;59(1):69-74 doi: 10.11406/rinketsu.59.69[published Online First: Epub Date]].
179. Bourque PR, Sampaio ML, Warman-Chardon J, Samaan S, Torres C. Neurolymphomatosis of the lumbosacral plexus and its branches: case series and literature review. *BMC Cancer* 2019;19(1):1149 doi: 10.1186/s12885-019-6365-y[published Online First: Epub Date]].
180. Chague P, Phan CM, Lapusan S, Zhang-Yin J, Cottureau AS. (18)F-FDG PET/CT imaging findings of extensive neurolymphomatosis as a relapse of diffuse large B cell lymphoma. *Diagn Interv Imaging* 2019;100(9):527-28 doi: 10.1016/j.diii.2019.02.006[published Online First: Epub Date]].
181. DeBoer SR, Lesche S, Rodriguez FJ, Ostrow LW. Teaching NeuroImages: Neurolymphomatosis. *Neurology* 2019;93(12):e1229-e30 doi: 10.1212/WNL.0000000000008131[published Online First: Epub Date]].
182. DeVries AH, Howe BM, Spinner RJ, Broski SM. B-cell peripheral neurolymphomatosis: MRI and (18)F-FDG PET/CT imaging characteristics. *Skeletal Radiol* 2019;48(7):1043-50 doi: 10.1007/s00256-019-3145-3[published Online First: Epub Date]].
183. Ganeshalingam R, Roach P, Schembri GP. Diffuse Large B-Cell Lymphoma Recurring as Neurolymphomatosis on FDG PET/CT. *Clin Nucl Med* 2019;44(2):145-47 doi: 10.1097/RLU.0000000000002388[published Online First: Epub Date]].
184. Iacobellis F, Di Serafino M, Blasio R, Barbuto L, Pezzullo F, Romano L. Secondary Neurolymphomatosis of the Radial Nerve: A Diagnostic Challenge. *Am J Case Rep* 2019;20:1652-58 doi: 10.12659/AJCR.916961[published Online First: Epub Date]].
185. Kobayashi H, Abe Y, Miura D, et al. Limited efficacy of high-dose methotrexate in patients with neurolymphomatosis. *Int J Hematol* 2019;109(3):286-91 doi: 10.1007/s12185-018-02586-7[published Online First: Epub Date]].
186. Li H, Luo SS, Zhao CB. Neurolymphomatosis caused by diffuse large B-cell lymphoma presenting as isolated brachial plexopathy. *Chin Med J (Engl)* 2019;132(22):2762-64 doi: 10.1097/CM9.0000000000000514[published Online First: Epub Date]].
187. Li V, Jaunmuktane Z, Cwynarski K, Carr A. Diagnostic delay in a case of T-cell neurolymphomatosis. *BMJ Case Rep* 2019;12(12) doi: 10.1136/bcr-2019-232538[published Online First: Epub Date]].

188. Matsue K, Abe Y, Narita K, et al. Diagnosis of intravascular large B cell lymphoma: novel insights into clinicopathological features from 42 patients at a single institution over 20 years. *Br J Haematol* 2019;187(3):328-36 doi: 10.1111/bjh.16081[published Online First: Epub Date].
189. Mori Y, Yamamoto K, Ohno A, Fukunaga M, Nishikawa A. Primary Central Nervous System Lymphoma with Peripheral Nerve Involvement: Case Report. *Cureus* 2019;11(9):e5675 doi: 10.7759/cureus.5675[published Online First: Epub Date].
190. Narita K, Kobayashi H, Kitadate A, et al. Neurolymphomatosis of the sciatic and tibial nerves as an initial presentation of lung diffuse large B cell lymphoma detected by positron emission tomography/computed tomography. *Int J Hematol* 2019;110(4):385-86 doi: 10.1007/s12185-019-02705-y[published Online First: Epub Date].
191. Padilha IG, Fischer T, Pacheco FT, Da Rocha AJ. Brachial and sacral plexus neurolymphomatosis - unusual regions for disease relapses. *Arq Neuropsiquiatr* 2019;77(11):832-33 doi: 10.1590/0004-282X20190104[published Online First: Epub Date].
192. Puffer RC, Dyck PJB, Paul P, Broski SM, Amrami KK, Spinner RJ. Putative mechanisms for spread and transformation of cutaneous T-cell lymphoma to neurolymphomatosis. *Muscle Nerve* 2019;60(5):E30-E33 doi: 10.1002/mus.26670[published Online First: Epub Date].
193. Rai W, Olcese V, Elsheikh B, Stino AM. Horner's Syndrome as Initial Manifestation of Possible Brachial Plexopathy Neurolymphomatosis. *Front Neurol* 2019;10:4 doi: 10.3389/fneur.2019.00004[published Online First: Epub Date].
194. Sato H, Hiroshima S, Anei R, Kamada K. Primary neurolymphomatosis of the trigeminal nerve. *Br J Neurosurg* 2019;1-4 doi: 10.1080/02688697.2019.1568391[published Online First: Epub Date].
195. Sosa-Albacete F, Pappolla A, Hem S, et al. [Primary neurolymphomatosis in the cauda equina as the initial symptom of human immunodeficiency virus]. *Rev Neurol* 2019;69(7):301-02 doi: 10.33588/rn.6907.2019244[published Online First: Epub Date].
196. Tai R, Maingard J, Nambiar M, Lim K. High-grade B-cell lymphoma relapse presenting as neurolymphomatosis of the median nerve. *BMJ Case Rep* 2019;12(3) doi: 10.1136/bcr-2018-228742[published Online First: Epub Date].
197. Yaseen MT, Aziz PAA, Siddique K, Tariq TA. Neurolymphomatosis of the Sciatic and Tibial Nerves. *J Coll Physicians Surg Pak* 2019;29(12):S86-S88 doi: 10.29271/jcpsp.2019.12.S86[published Online First: Epub Date].
198. Campagnolo M, Cacciavillani M, Cavallaro T, et al. Neurolymphomatosis, a rare manifestation of peripheral nerve involvement in lymphomas: Suggestive features and diagnostic challenges. *J Peripher Nerv Syst* 2020;25(3):312-15 doi: 10.1111/jns.12401[published Online First: Epub Date].
199. Facchinelli D, Ciliberti E, Stussi G, Ceriani L, Zucca E. Sciatic pain by neurolymphomatosis as initial presentation of disseminated diffuse large B cell lymphoma involving the testis and the CNS. *Hematol Oncol* 2020;38(2):197-200 doi: 10.1002/hon.2698[published Online First: Epub Date].
200. Fatima N, Zaman MU, Zaman A, Zaman SU. Neurolymphomatosis - Rare presentation in non-Hodgkin's lymphoma: The role of (18)F-fluorodeoxyglucose positron-emission tomography and computerized tomography imaging. *World J Nucl Med* 2020;19(2):159-61 doi: 10.4103/wjnm.WJNM\_22\_19[published Online First: Epub Date].

201. Fitzgerald L, Stephens DM. Burkitt Lymphoma Presenting as Cranial Multineuritis Secondary to Primary Neurolymphomatosis: A Diagnostic Challenge. *Clin Lymphoma Myeloma Leuk* 2020;20(4):e201-e04 doi: 10.1016/j.clml.2020.01.012[published Online First: Epub Date]].
202. Keddie S, Nagendran A, Cox T, et al. Peripheral nerve neurolymphomatosis: Clinical features, treatment, and outcomes. *Muscle Nerve* 2020;62(5):617-25 doi: 10.1002/mus.27045[published Online First: Epub Date]].
203. Lorance DK, Allison JB, Gardner JA, Waheed W. Protean Manifestations and Diagnostic Challenges Including Discordance Between Electrodiagnostic-Radiologic Studies in Neurolymphomatosis. *Neurologist* 2020;25(1):4-9 doi: 10.1097/NRL.000000000000245[published Online First: Epub Date]].
204. Murthy NK, Amrami KK, Spinner RJ. Circumdural extension of perineural spread leading to bilateral disease in neurolymphomatosis. *Acta Neurochir (Wien)* 2020;162(12):3197-200 doi: 10.1007/s00701-020-04417-3[published Online First: Epub Date]].
205. Murthy NK, Hebert-Blouin MN, Capek S, Prasad NK, Amrami KK, Spinner RJ. Understanding the Pathognomonic Tumefactive Appearance of Neurolymphomatosis: A Unifying Theory of Neurolymphoma. *World Neurosurg* 2020;141:e490-e97 doi: 10.1016/j.wneu.2020.05.228[published Online First: Epub Date]].
206. Murthy NK, Sharma M, Spinner RJ. Primary peripheral nerve tumors associated with nerve-territory herpes zoster. *Acta Neurochir (Wien)* 2020;162(5):1147-51 doi: 10.1007/s00701-020-04292-y[published Online First: Epub Date]].
207. Nepal P, Batchala PP, Rehm PK, Fadul CE. Diffuse large B-cell lymphoma relapse presenting as extensive neurolymphomatosis. *Neuroradiol J* 2020;33(3):230-35 doi: 10.1177/1971400920924799[published Online First: Epub Date]].
208. Nishikawara M, Kawakami T, Sakai H, et al. Magnetic Resonance Imaging-negative, Rituximab-resistant Neurolymphomatosis as a Paradoxical Presentation of Relapsed Primary Adrenal Lymphoma. *Intern Med* 2020;59(11):1437-43 doi: 10.2169/internalmedicine.4085-19[published Online First: Epub Date]].
209. Pan Q, Luo Y. Recurrence of nasal type NK/T cell lymphoma presenting as neurolymphomatosis on 18F-FDG PET/CT: A case report and literature review. *Medicine (Baltimore)* 2020;99(1):e18640 doi: 10.1097/MD.00000000000018640[published Online First: Epub Date]].
210. Seegobin K, Alhaj Moustafa M, Fischer D, et al. Systemic ALK-positive anaplastic large cell lymphoma with bilateral optic neurolymphomatosis resulting in permanent blindness. *Clin Case Rep* 2020;8(12):2629-33 doi: 10.1002/ccr3.3231[published Online First: Epub Date]].
211. Shima T, Tsujino A. [Neurolymphomatosis Mimicking Inflammatory Neuropathy with Slight FDG Uptake on PET/CT and Distinct MRI Abnormalities in the Brachial Plexus: A Case Report]. *Brain Nerve* 2020;72(9):987-92 doi: 10.11477/mf.1416201632[published Online First: Epub Date]].
212. Singh SS, Mittal BR, Kumar R, Singh H, Balaini N, Goyal M. Primary Central Nervous System Lymphoma With Diffuse Neurolymphomatosis Involving Multiple Cranial and Spinal Nerve Roots. *Clin Nucl Med* 2020;45(6):e285-e87 doi: 10.1097/RLU.0000000000003018[published Online First: Epub Date]].
213. Switlyk MD, Skeie AT, Lund-Iversen M, Ostenstad B. Magnetic resonance imaging and (18)F-fluorodeoxyglucose positron emission tomography/computed tomography findings in

- neurolymphomatosis: an uncommon presentation of diffuse large B cell lymphoma. *Ann Hematol* 2020;99(1):203-05 doi: 10.1007/s00277-019-03850-4[published Online First: Epub Date]].
214. Yadav D, Angamuthu M, Subudhi TK, Das CJ, Kumar R. PET/CT in Evaluation of Low Backache Due to Sacral Nerve Root Involvement: Inflammatory and Malignant Involvement. *Clin Nucl Med* 2020;45(6):e299-e300 doi: 10.1097/RLU.0000000000003021[published Online First: Epub Date]].
215. Alazawi S, Elomri H, Taha R, et al. Neurolymphomatosis of the median nerve, optic nerve, L4 spinal nerve root and cauda equina in patients with B-cell malignancies: a case series. *J Med Case Rep* 2021;15(1):133 doi: 10.1186/s13256-021-02714-8[published Online First: Epub Date]].
216. Campagnolo M, Cacciavillani M, Briani C. Heterogeneous clinical and imaging findings and long-term prognosis in patients with neurolymphomatosis. *Muscle Nerve* 2021;63(3):E24-E26 doi: 10.1002/mus.27154[published Online First: Epub Date]].
217. Fritzhand SJ, Esmaeli B, Sun J, Debnam JM. Primary disease sites and patterns of spread in cases of neurolymphomatosis in the orbit associated with lymphoma. *Cancer Imaging* 2021;21(1):39 doi: 10.1186/s40644-021-00409-3[published Online First: Epub Date]].
218. Hamaguchi M, Kokubun N, Matsuda H, et al. A case report of secondary neurolymphomatosis showing selective nerve infiltration and massive lumbar plexus enlargement. *BMC Neurol* 2021;21(1):296 doi: 10.1186/s12883-021-02330-5[published Online First: Epub Date]].
219. Jeong J, Kim SW, Sung DH. Neurolymphomatosis: a single-center experience of neuromuscular manifestations, treatments, and outcomes. *J Neurol* 2021;268(3):851-59 doi: 10.1007/s00415-020-10202-0[published Online First: Epub Date]].
220. Khurana A, Dalland JC, Young JR, Inwards DJ, Paludo J. Brexucabtagene autoleucel therapy induces complete remission in a primary refractory blastoid mantle cell lymphoma with neurolymphomatosis. *Am J Hematol* 2021;96(8):E298-E301 doi: 10.1002/ajh.26233[published Online First: Epub Date]].
221. Khurana A, Novo M, Nowakowski GS, et al. Clinical manifestations of, diagnostic approach to, and treatment of neurolymphomatosis in the rituximab era. *Blood Adv* 2021;5(5):1379-87 doi: 10.1182/bloodadvances.2020003666[published Online First: Epub Date]].
222. Kim KT, Kim SI, Do YR, Jung HR, Cho JH. Sciatic nerve neurolymphomatosis as the initial presentation of primary diffuse large B-cell lymphoma: a rare cause of leg weakness. *Yeungnam Univ J Med* 2021;38(3):258-63 doi: 10.12701/yujm.2021.00983[published Online First: Epub Date]].
223. Kuhlman JJ, Alhaj Moustafa M, Gupta V, Jiang L, Tun HW. Primary Cauda Equina Lymphoma Treated with CNS-Centric Approach: A Case Report and Literature Review. *J Blood Med* 2021;12:645-52 doi: 10.2147/JBM.S325264[published Online First: Epub Date]].
224. Lee YC, Huang GS, Chang WC, Hsu YC. Fried egg sign: A typical ultrasonography feature of neurolymphomatosis. *J Clin Ultrasound* 2021;49(8):878-80 doi: 10.1002/jcu.23029[published Online First: Epub Date]].
225. Makranz C, Arkadir D, Nachmias B, et al. Neurological misdiagnoses of lymphoma. *Neurol Sci* 2021;42(5):1933-40 doi: 10.1007/s10072-020-04724-8[published Online First: Epub Date]].
226. Negre Buso M, Balliu Collgros E, Rubio Rodriguez A, Pelaez Hernandez I, Mestre Fusco A, Roncero Vidal JM. Utility of the (18)F-FDG PET/CT in the diagnosis of the



- neurolymphomatosis: A case report. *Rev Esp Med Nucl Imagen Mol (Engl Ed)* 2021;40(5):328-31 doi: 10.1016/j.remnie.2020.09.017[published Online First: Epub Date]].
227. Nishida K, Takenaka Y, Yamasaki H, Futamura N. Garcin Syndrome in a Patient With Neurolymphomatosis. *Neurology* 2021 doi: 10.1212/WNL.0000000000012485[published Online First: Epub Date]].
228. Rastogi P, Singh H, Gupta P, Bal A, Dutta U, Gupta N. Extra-hepatic biliary obstruction due to diffuse large B-cell lymphoma: an autopsy case report with unattended yet significant pathologies. *Clin J Gastroenterol* 2021;14(1):269-74 doi: 10.1007/s12328-020-01252-y[published Online First: Epub Date]].
229. Raut TP, Bhatt M, Hastak M, et al. Neurolymphomatosis as a Presenting Feature of Primary Testicular Lymphoma. *Ann Indian Acad Neurol* 2021;24(2):269-72 doi: 10.4103/aian.AIAN\_304\_20[published Online First: Epub Date]].
230. Sheng S, Sharma R, Samant R, Yuan J, Nalleballe K, Kapoor N. Isolated primary neurolymphomatosis with cranial multineuritis: a case presentation. *Neurol Sci* 2021;42(3):1223-26 doi: 10.1007/s10072-020-04806-7[published Online First: Epub Date]].
231. Barahona D, Adlerstein I, Donoso J, Mercado F. Sciatic and median nerve neurolymphomatosis as initial presentation of B-cell lymphoma. *Radiologia (Engl Ed)* 2022;64(3):266-69 doi: 10.1016/j.rxeng.2020.10.003[published Online First: Epub Date]].

|                                            |     |
|--------------------------------------------|-----|
| <b>Cranial Nerves(226)</b>                 |     |
| Unspecified cranial nerves                 | 129 |
| Olfactory                                  | 1   |
| Optic Nerve                                | 4   |
| Oculomotor nerve                           | 12  |
| Trochlear nerve                            | 1   |
| Trigeminal nerve                           | 32  |
| Mandibular nerve                           | 1   |
| Abducens nerve                             | 5   |
| Facial nerves                              | 16  |
| Mental nerve                               | 2   |
| Temporal nerve                             | 1   |
| Vestibulocochlear (acoustic)               | 7   |
| Vagus nerve                                | 5   |
| Hypoglossal nerve                          | 1   |
| Glossopharyngeal                           | 3   |
| Infratrochlear nerve                       | 1   |
| Pharyngeal/vagal nerve                     | 1   |
| Ciliary nerve                              | 1   |
| Internal auditory canal nerve              | 1   |
| 7th and 8th nerve complex                  | 1   |
| 7th and 8th nerve complex                  | 1   |
| <b>Neural Plexus(290)</b>                  |     |
| Unspecified Peripheral nerves              | 27  |
| <b>Brachial plexus(139)</b>                |     |
| Brachial plexus                            | 133 |
| Axillary nerve                             | 5   |
| Suprascapular nerve                        | 1   |
| <b>Lumbosacral plexus nerves(151)</b>      |     |
| Lumbosacral plexus nerves                  | 71  |
| Lumbar plexus                              | 17  |
| Obturator nerve                            | 1   |
| Piriformis nerve                           | 1   |
| Cauda Equina                               | 59  |
| Iliac nerves                               | 1   |
| Gluteal nerve                              | 1   |
| <b>Spinal Nerves(241)</b>                  |     |
| Unspecified Spinal nerves                  | 45  |
| <b>Lumbar and sacral nerve roots(92)</b>   |     |
| Lumbar nerves (L)                          | 37  |
| Sacral (S)                                 | 50  |
| S1                                         | 1   |
| S1-S3                                      | 2   |
| S2                                         | 1   |
| Coccygeal                                  | 1   |
| <b>Lumbar &amp; sacral nerve roots(61)</b> |     |
| Cervical spinal nerves (C)                 | 54  |
| C4/5                                       | 1   |
| C5/6                                       | 1   |
| C8                                         | 5   |
| <b>Thoracic nerve roots(43)</b>            |     |
| Thoracic nerves                            | 38  |
| T8-9                                       | 1   |
| T12-L1                                     | 0   |
| T12-L5                                     | 1   |
| Intercostal                                | 3   |
| <b>Peripheral Nerves(338)</b>              |     |
| <b>Distal upper extremities nerves(44)</b> |     |
| Median Nerve                               | 27  |
| Anterior interosseous nerve                | 1   |
| Ulnar nerve                                | 12  |
| Radial nerve                               | 4   |
| Posterior cutaneous nerve of forearm       | 0   |
| <b>Distal lower extremity nerves(294)</b>  |     |
| Saphenous nerve                            | 3   |
| Femoral nerve                              | 30  |
| Sciatic                                    | 120 |
| Peroneal nerve                             | 17  |
| Fibular nerves                             | 1   |
| Popliteal nerve                            | 2   |
| Sural nerve                                | 15  |
| Tibial (shin)                              | 25  |
| Plantar nerves                             | 0   |
| Unspecified neural plexus                  | 81  |
| <b>Other nerves(8)</b>                     |     |
| Other nerves                               | 8   |

**Supplemental Table 2:** Lists of peripheral nerve involvement.

**Supplemental Table 3:** Lists of lymphoma histologies. ALCL, anaplastic large cell lymphoma; CLL/SLL, chronic lymphocytic leukemia/small lymphocytic lymphoma; IVL, intravascular lymphomatosis; MALT, mucosa-assisted lymphoid tissue; NK, natural killer.

| <b>B-Cell lymphomas(689)</b>                 |     |
|----------------------------------------------|-----|
| Unspecified B-cell                           | 18  |
| Diffuse large B-cell                         | 360 |
| Follicular                                   | 51  |
| CLL/SLL                                      | 10  |
| Mantle cell                                  | 51  |
| Marginal zone                                | 50  |
| Burkitt                                      | 13  |
| Lymphoplasmacytic                            | 53  |
| MALT                                         | 5   |
| High-grade B-cell                            | 10  |
| Low-grade B-cell                             | 46  |
| Intermediate & triple-hit B-cell             | 3   |
| B acute lymphoblastic leukemia               | 1   |
| IVL                                          | 18  |
| Plasma cell leukemia                         | 1   |
| <b>T-cell lymphomas(91)</b>                  |     |
| T lymphoblastic lymphoma/leukemia            | 8   |
| Peripheral T-cell                            | 46  |
| Cutaneous T-cell                             | 4   |
| Adult T-cell leukemia/lymphoma               | 2   |
| Extranodal NK/T-cell* (lymphoma, nasal type) | 8   |
| ALCL                                         | 2   |
| Unspecified T-cell                           | 14  |
| Enteropathy-associated T-cell                | 1   |
| T-cell acute lymphocytic leukemia            | 1   |
| <b>Other(5)</b>                              |     |
| Acute nonlymphocytic leukemia                | 2   |
| Acute myelogenous leukemia                   | 2   |
| Histiocytic lymphoma                         | 1   |

**Supplemental Table 4:** Decade analysis of (A) OS, (B) treatment 1 to progression, (C) symptom onset to diagnosis, and (D) symptom onset to death periods.

| <b>Decade Analysis</b>                      |          |                        |                      |                           |                    |                    |
|---------------------------------------------|----------|------------------------|----------------------|---------------------------|--------------------|--------------------|
| <b>Overall Survival</b>                     |          |                        |                      |                           |                    |                    |
| <b>Decades</b>                              | <b>N</b> | <b>Median (months)</b> | <b>Mean (months)</b> | <b>Standard deviation</b> | <b>Lower bound</b> | <b>Upper bound</b> |
| ≤1990                                       | 8        | 0                      | 0.25                 | 0.707106781               | 0                  | 1.664213562        |
| 1991-2000                                   | 14       | 0.5                    | 7.535714286          | 22.11374815               | 0                  | 51.76321058        |
| 2001-2010                                   | 93       | 10                     | 10.22768421          | 12.6038322                | 0                  | 35.43534861        |
| 2011-2020                                   | 248      | 8                      | 14.76141129          | 19.952725                 | 0                  | 54.66686129        |
| 2021-2022                                   | 50       | 26.2                   | 73.288               | 58.07474649               | 0                  | 189.437493         |
| <b>Time from Treatment 1 to Progression</b> |          |                        |                      |                           |                    |                    |
| <b>Decades</b>                              | <b>N</b> | <b>Median (months)</b> | <b>Mean (months)</b> | <b>Standard deviation</b> | <b>Lower bound</b> | <b>Upper bound</b> |
| ≤1990                                       | 0        | N/A                    | N/A                  | N/A                       | N/A                | N/A                |
| 1991-2000                                   | 1        | 2                      | 2                    | N/A                       | N/A                | N/A                |
| 2001-2010                                   | 4        | 2                      | 4.1875               | 5.304773793               | 0                  | 14.79704759        |
| 2011-2020                                   | 49       | 6.4                    | 9.305918367          | 11.57894244               | 0                  | 32.46380324        |
| 2021-2022                                   | 40       | 36                     | 28.61                | 11.04609921               | 6.517801586        | 50.70219841        |
| <b>Time from Symptom Onset to Diagnosis</b> |          |                        |                      |                           |                    |                    |
| <b>Decades</b>                              | <b>N</b> | <b>Median (months)</b> | <b>Mean (months)</b> | <b>Standard deviation</b> | <b>Lower bound</b> | <b>Upper bound</b> |
| ≤1990                                       | 1        | 6                      | 6                    | N/A                       | N/A                | N/A                |
| 1991-2000                                   | N/A      | N/A                    | N/A                  | N/A                       | N/A                | N/A                |
| 2001-2010                                   | 20       | 2                      | 9.2                  | 17.81143926               | 0                  | 44.82287851        |
| 2011-2020                                   | 81       | 3                      | 7.821851852          | 14.76708224               | 0                  | 37.35601632        |
| 2021-2022                                   | 7        | 4                      | 18.78571429          | 34.62881404               | 0                  | 88.04334237        |
| <b>Time from Symptom Onset to Death</b>     |          |                        |                      |                           |                    |                    |
| <b>Decades</b>                              | <b>N</b> | <b>Median (months)</b> | <b>Mean (months)</b> | <b>Standard deviation</b> | <b>Lower bound</b> | <b>Upper bound</b> |
| ≤1990                                       | 8        | 0                      | 1                    | 2.138089935               | 0                  | 5.276179871        |
| 1991-2000                                   | 14       | 0.5                    | 7.535714286          | 22.11374815               | 0                  | 51.76321058        |
| 2001-2010                                   | 95       | 10                     | 12.16136842          | 19.06360019               | 0                  | 50.28856881        |
| 2011-2020                                   | 266      | 8.75                   | 16.1443609           | 21.13840025               | 0                  | 58.4211614         |
| 2021-2022                                   | 52       | 26.2                   | 72.99807692          | 57.50248585               | 0                  | 188.0030486        |
| NA= Not Available                           |          |                        |                      |                           |                    |                    |

**Supplemental Table 5:** Analysis of various treatments on (A) OS, (B) treatment 1 to progression, (C) symptom onset to diagnosis, and (D) symptom onset to death periods.

**5A**

| <b>Overall Survival</b>                                    |                |                                    |                      |                           |                    |                    |
|------------------------------------------------------------|----------------|------------------------------------|----------------------|---------------------------|--------------------|--------------------|
| <b>Types of treatment</b>                                  | <b>N</b>       | <b>Median (months)</b>             | <b>Mean (months)</b> | <b>Standard deviation</b> | <b>Lower bound</b> | <b>Upper bound</b> |
| Rituximab & R-CHOP                                         | 125            | 16.25                              | 32.472               | 44.37503757               | 0                  | 121.2220751        |
| HD-MTX                                                     | 81             | 18.5                               | 37.22098765          | 47.24362697               | 0                  | 131.7080416        |
| Radiation                                                  | 79             | 6.885                              | 11.70594937          | 17.20808429               | 0                  | 46.12211735        |
| HD-MTX + rituximab                                         | 40             | 19                                 | 19.5                 | 11.97914855               | 0                  | 43.4582971         |
| Transplant                                                 | 32             | 25.4                               | 58.5915625           | 55.94084605               | 0                  | 170.4732546        |
| HD-MTX + transplant                                        | 12             | 25.4                               | 50.61666667          | 52.40520991               | 0                  | 155.4270865        |
| Rituximab + transplant                                     | 11             | 23.65                              | 60.87272727          | 60.21908235               | 0                  | 181.310892         |
| Corticosteroids                                            | 6              | 12                                 | 12.66666667          | 6.047431568               | 0.57180353         | 24.7615298         |
| HD-MTX + rituximab + transplant                            | 5              | 138                                | 88.9                 | 69.22746324               | 0                  | 227.3549265        |
| <b>Kruskal-Wallis chi-squared = 63.493</b>                 | <b>df = 8</b>  | <b>p value = 9.578e-11</b>         |                      |                           |                    |                    |
| <b>Pair</b>                                                | <b>Z score</b> | <b>Bonferroni adjusted p value</b> |                      |                           |                    |                    |
| Radiation vs. Transplant                                   | -6.093421218   | 1.98941E-08                        |                      |                           |                    |                    |
| HD-MTX vs. Radiation                                       | 5.419037395    | 1.07857E-06                        |                      |                           |                    |                    |
| Radiation vs. Rituximab & R-CHOP                           | -4.584609307   | 8.18705E-05                        |                      |                           |                    |                    |
| HD-MTX + transplant vs. Radiation                          | 4.101924519    | 0.00073751                         |                      |                           |                    |                    |
| HD-MTX + rituximab vs. Radiation                           | 4.043568706    | 0.000947587                        |                      |                           |                    |                    |
| Radiation vs. Rituximab + transplant                       | -3.951242233   | 0.001399438                        |                      |                           |                    |                    |
| HD-MTX + rituximab + transplant vs. Radiation              | 3.413612016    | 0.0115394                          |                      |                           |                    |                    |
| Rituximab & R-CHOP vs. Transplant                          | -3.118820434   | 0.03268379                         |                      |                           |                    |                    |
| HD-MTX + rituximab vs. Transplant                          | -2.075083322   | 0.6836186                          |                      |                           |                    |                    |
| HD-MTX + transplant vs. Rituximab & R-CHOP                 | 2.024837769    | 0.7719125                          |                      |                           |                    |                    |
| HD-MTX vs. Transplant                                      | -2.01125314    | 0.7973771                          |                      |                           |                    |                    |
| HD-MTX + rituximab + transplant vs. Rituximab & R-CHOP     | 2.006793363    | 0.8058901                          |                      |                           |                    |                    |
| Corticosteroids vs. Transplant                             | -1.993593993   | 0.8197942                          |                      |                           |                    |                    |
| Corticosteroids vs. HD-MTX + rituximab + transplant        | -1.960143547   | 0.8996223                          |                      |                           |                    |                    |
| Rituximab & R-CHOP vs. Rituximab + transplant              | -1.947930314   | 0.9254902                          |                      |                           |                    |                    |
| Corticosteroids vs. HD-MTX                                 | -1.109989084   | 1                                  |                      |                           |                    |                    |
| Corticosteroids vs. HD-MTX + rituximab                     | -0.907786497   | 1                                  |                      |                           |                    |                    |
| HD-MTX vs. HD-MTX + rituximab                              | 0.373650378    | 1                                  |                      |                           |                    |                    |
| HD-MTX vs. HD-MTX + rituximab + transplant                 | -1.556588261   | 1                                  |                      |                           |                    |                    |
| HD-MTX + rituximab vs. HD-MTX + rituximab + transplant     | -1.664410425   | 1                                  |                      |                           |                    |                    |
| Corticosteroids vs. HD-MTX + transplant                    | -1.767243395   | 1                                  |                      |                           |                    |                    |
| HD-MTX vs. HD-MTX + transplant                             | -1.338376601   | 1                                  |                      |                           |                    |                    |
| HD-MTX + rituximab vs. HD-MTX + transplant                 | -1.477166519   | 1                                  |                      |                           |                    |                    |
| HD-MTX + rituximab + transplant vs. HD-MTX + transplant    | 0.569809304    | 1                                  |                      |                           |                    |                    |
| Corticosteroids vs. Radiation                              | 0.914490685    | 1                                  |                      |                           |                    |                    |
| Corticosteroids vs. Rituximab & R-CHOP                     | -0.650076212   | 1                                  |                      |                           |                    |                    |
| HD-MTX vs. Rituximab & R-CHOP                              | 1.387758267    | 1                                  |                      |                           |                    |                    |
| HD-MTX + rituximab vs. Rituximab & R-CHOP                  | 0.692172641    | 1                                  |                      |                           |                    |                    |
| Corticosteroids vs. Rituximab + transplant                 | -1.74244955    | 1                                  |                      |                           |                    |                    |
| HD-MTX vs. Rituximab + transplant                          | -1.290537126   | 1                                  |                      |                           |                    |                    |
| HD-MTX + rituximab vs. Rituximab + transplant              | -1.430148019   | 1                                  |                      |                           |                    |                    |
| HD-MTX + rituximab + transplant vs. Rituximab + transplant | 0.561033981    | 1                                  |                      |                           |                    |                    |
| HD-MTX + transplant vs. Rituximab + transplant             | -0.001688781   | 1                                  |                      |                           |                    |                    |
| HD-MTX + rituximab + transplant vs. Transplant             | 0.61833954     | 1                                  |                      |                           |                    |                    |
| HD-MTX + transplant vs. Transplant                         | -0.017589872   | 1                                  |                      |                           |                    |                    |
| Rituximab + transplant vs. Transplant                      | -0.015018806   | 1                                  |                      |                           |                    |                    |

| Time from Treatment 1 to Progression          |                |                                    |                            |                    |             |             |
|-----------------------------------------------|----------------|------------------------------------|----------------------------|--------------------|-------------|-------------|
| Types of treatment                            | N              | Median (months)                    | Mean (months)              | Standard deviation | Lower bound | Upper bound |
| Rituximab & R-CHOP                            | 51             | 36                                 | 23.431                     | 15.01322302        | 0           | 53.45744605 |
| HD-MTX                                        | 45             | 36                                 | 24.75340909                | 14.62797387        | 0           | 54.00935683 |
| HD-MTX + rituximab                            | 31             | 36                                 | 32.06666667                | 11.31299567        | 9.440675332 | 54.692658   |
| Transplant                                    | 19             | 11                                 | 17.25555556                | 11.0250003         | 0           | 39.30555615 |
| Radiation                                     | 14             | 9.4                                | 7.861538462                | 3.521741993        | 0.818054475 | 14.90502245 |
| Rituximab + transplant                        | 7              | 36                                 | 26.5                       | 16.47888259        | 0           | 59.45776518 |
| HDMTX + transplant                            | 6              | 28.4                               | 29.92                      | 14.17072771        | 1.578544582 | 58.26145542 |
| Corticosteroids                               | 1              | 13                                 | N/A                        | 8.485281374        | N/A         | N/A         |
| HD-MTX + rituximab + transplant               | 0              | N/A                                | N/A                        | N/A                | N/A         | N/A         |
| N/A = Not applicable                          |                |                                    |                            |                    |             |             |
| <b>Kruskal-Wallis chi-square d=26.8</b>       |                | <b>df = 7</b>                      | <b>p value = 0.0003621</b> |                    |             |             |
| <b>Pair</b>                                   | <b>Z score</b> | <b>Bonferroni adjusted p value</b> |                            |                    |             |             |
| HD-MTX + rituximab vs. Radiation              | 4.9307755      | 1.14665E-05                        |                            |                    |             |             |
| HD-MTX vs. Radiation                          | 3.6202112      | 0.004121077                        |                            |                    |             |             |
| Radiation vs. Rituximab & R-CHOP              | -3.3744642     | 0.01035433                         |                            |                    |             |             |
| HD-MTX + rituximab vs. Transplant             | 3.0069485      | 0.03694382                         |                            |                    |             |             |
| HD-MTX + rituximab vs. Rituximab & R-CHOP     | 2.5194367      | 0.1645599                          |                            |                    |             |             |
| HDMTX + transplant vs. Radiation              | 2.4217916      | 0.2162189                          |                            |                    |             |             |
| Radiation vs. Rituximab + transplant          | -2.2129991     | 0.3765679                          |                            |                    |             |             |
| HD-MTX vs. HD-MTX + rituximab                 | -2.0773454     | 0.5287757                          |                            |                    |             |             |
| Radiation vs. Transplant                      | -2.0204051     | 0.6067794                          |                            |                    |             |             |
| Corticosteroids vs. HD-MTX                    | -0.4078558     | 1                                  |                            |                    |             |             |
| Corticosteroids vs. HD-MTX + rituximab        | -0.880889      | 1                                  |                            |                    |             |             |
| Corticosteroids vs. HDMTX + transplant        | -0.4526959     | 1                                  |                            |                    |             |             |
| HD-MTX vs. HDMTX + transplant                 | -0.17671       | 1                                  |                            |                    |             |             |
| HD-MTX + rituximab vs. HDMTX + transplant     | 0.9103312      | 1                                  |                            |                    |             |             |
| Corticosteroids vs. Radiation                 | 0.669256       | 1                                  |                            |                    |             |             |
| Corticosteroids vs. Rituximab & R-CHOP        | -0.3202304     | 1                                  |                            |                    |             |             |
| HD-MTX vs. Rituximab & R-CHOP                 | 0.4395543      | 1                                  |                            |                    |             |             |
| HDMTX + transplant vs. Rituximab & R-CHOP     | 0.38425        | 1                                  |                            |                    |             |             |
| Corticosteroids vs. Rituximab + transplant    | -0.3102524     | 1                                  |                            |                    |             |             |
| HD-MTX vs. Rituximab + transplant             | 0.1986457      | 1                                  |                            |                    |             |             |
| HD-MTX + rituximab vs. Rituximab + transplant | 1.3461263      | 1                                  |                            |                    |             |             |
| HDMTX + transplant vs. Rituximab + transplant | 0.2827251      | 1                                  |                            |                    |             |             |
| Rituximab & R-CHOP vs. Rituximab + transplant | -0.0208117     | 1                                  |                            |                    |             |             |
| Corticosteroids vs. Transplant                | -0.0184066     | 1                                  |                            |                    |             |             |
| HD-MTX vs. Transplant                         | 1.4424866      | 1                                  |                            |                    |             |             |
| HDMTX + transplant vs. Transplant             | 1.003822       | 1                                  |                            |                    |             |             |
| Rituximab & R-CHOP vs. Transplant             | 1.1355556      | 1                                  |                            |                    |             |             |
| Rituximab + transplant vs. Transplant         | 0.7074415      | 1                                  |                            |                    |             |             |

# 5C

| Time from Symptom Onset to Diagnosis                       |                |                                    |                         |                    |             |             |
|------------------------------------------------------------|----------------|------------------------------------|-------------------------|--------------------|-------------|-------------|
| Types of treatment                                         | N              | Median (months)                    | Mean (months)           | Standard deviation | Lower bound | Upper bound |
| Rituximab & R-CHOP                                         | 35             | 3                                  | 11.02941176             | 20.3533469         | 0           | 51.73610557 |
| Radiation                                                  | 22             | 2.566666667                        | 8.434126984             | 10.9523765         | 0           | 30.33887998 |
| HD-MTX                                                     | 16             | 3.25                               | 5.5                     | 5.755751599        | 0           | 17.0115032  |
| Transplant                                                 | 8              | 5.5                                | 18.85714286             | 30.25768956        | 0           | 79.37252199 |
| HD-MTX + rituximab                                         | 8              | 4                                  | 5.857142857             | 4.841946349        | 0           | 15.54103555 |
| HD-MTX + transplant                                        | 4              | 8                                  | 9.666666667             | 5.93295879         | 0           | 21.53258425 |
| Rituximab + transplant                                     | 3              | 8                                  | 5.2                     | 45.90842334        | 0           | 143.8168467 |
| Corticosteroids                                            | 1              | 6                                  | N/A                     | 3.53533906         | N/A         | N/A         |
| HD-MTX + rituximab + transplant                            | 1              | 8                                  | N/A                     | 4.949747468        | N/A         | N/A         |
| N/A = Not applicable                                       |                |                                    |                         |                    |             |             |
| <b>Kruskal-Wallis chi-squared = 3.9978</b>                 |                |                                    |                         |                    |             |             |
|                                                            |                | <b>df = 8</b>                      | <b>p value = 0.8573</b> |                    |             |             |
| <b>Pair</b>                                                | <b>Z score</b> | <b>Bonferroni adjusted p value</b> |                         |                    |             |             |
| Corticosteroids vs. HD-MTX                                 | 0.40138776     | 1                                  |                         |                    |             |             |
| Corticosteroids vs. HD-MTX + rituximab                     | 0.41719656     | 1                                  |                         |                    |             |             |
| HD-MTX vs. HD-MTX + rituximab                              | 0.06642472     | 1                                  |                         |                    |             |             |
| Corticosteroids vs. HD-MTX + rituximab + transplant        | -0.23780204    | 1                                  |                         |                    |             |             |
| HD-MTX vs. HD-MTX + rituximab + transplant                 | -0.72764947    | 1                                  |                         |                    |             |             |
| HD-MTX + rituximab vs. HD-MTX + rituximab + transplant     | -0.73426595    | 1                                  |                         |                    |             |             |
| Corticosteroids vs. HD-MTX + transplant                    | -0.25330394    | 1                                  |                         |                    |             |             |
| HD-MTX vs. HD-MTX + transplant                             | -1.24673035    | 1                                  |                         |                    |             |             |
| HD-MTX + rituximab vs. HD-MTX + transplant                 | -1.18507326    | 1                                  |                         |                    |             |             |
| HD-MTX + rituximab + transplant vs. HD-MTX + transplant    | 0.04749449     | 1                                  |                         |                    |             |             |
| Corticosteroids vs. Radiation                              | 0.44458025     | 1                                  |                         |                    |             |             |
| HD-MTX vs. Radiation                                       | 0.12427102     | 1                                  |                         |                    |             |             |
| HD-MTX + rituximab vs. Radiation                           | 0.02923084     | 1                                  |                         |                    |             |             |
| HD-MTX + rituximab + transplant vs. Radiation              | 0.77349095     | 1                                  |                         |                    |             |             |
| HD-MTX + transplant vs. Radiation                          | 1.35730763     | 1                                  |                         |                    |             |             |
| Corticosteroids vs. Rituximab & R-CHOP                     | 0.31015736     | 1                                  |                         |                    |             |             |
| HD-MTX vs. Rituximab & R-CHOP                              | -0.328663      | 1                                  |                         |                    |             |             |
| HD-MTX + rituximab vs. Rituximab & R-CHOP                  | -0.32649327    | 1                                  |                         |                    |             |             |
| HD-MTX + rituximab + transplant vs. Rituximab & R-CHOP     | 0.64175646     | 1                                  |                         |                    |             |             |
| HD-MTX + transplant vs. Rituximab & R-CHOP                 | 1.13255192     | 1                                  |                         |                    |             |             |
| Radiation vs. Rituximab & R-CHOP                           | -0.51461541    | 1                                  |                         |                    |             |             |
| Corticosteroids vs. Rituximab + transplant                 | -0.16350699    | 1                                  |                         |                    |             |             |
| HD-MTX vs. Rituximab + transplant                          | -0.35770468    | 1                                  |                         |                    |             |             |
| HD-MTX + rituximab vs. Rituximab + transplant              | -0.93249986    | 1                                  |                         |                    |             |             |
| HD-MTX + rituximab + transplant vs. Rituximab + transplant | 0.12773984     | 1                                  |                         |                    |             |             |
| HD-MTX + transplant vs. Rituximab + transplant             | 0.12359967     | 1                                  |                         |                    |             |             |
| Radiation vs. Rituximab + transplant                       | -1.04535849    | 1                                  |                         |                    |             |             |
| Rituximab & R-CHOP vs. Rituximab + transplant              | -0.83672035    | 1                                  |                         |                    |             |             |
| Corticosteroids vs. Transplant                             | 0.04171966     | 1                                  |                         |                    |             |             |
| HD-MTX vs. Transplant                                      | -0.85330212    | 1                                  |                         |                    |             |             |
| HD-MTX + rituximab vs. Transplant                          | -0.7965068     | 1                                  |                         |                    |             |             |
| HD-MTX + rituximab + transplant vs. Transplant             | 0.35878904     | 1                                  |                         |                    |             |             |
| HD-MTX + transplant vs. Transplant                         | 0.53472818     | 1                                  |                         |                    |             |             |
| Radiation vs. Transplant                                   | -0.99384848    | 1                                  |                         |                    |             |             |
| Rituximab & R-CHOP vs. Transplant                          | -0.68976544    | 1                                  |                         |                    |             |             |
| Rituximab + transplant vs. Transplant                      | 0.3442406      | 1                                  |                         |                    |             |             |

# 5D

| Time from Symptom Onset to Death                      |               |                             |               |                    |             |             |
|-------------------------------------------------------|---------------|-----------------------------|---------------|--------------------|-------------|-------------|
| Types of treatment                                    | N             | Median (months)             | Mean (months) | Standard deviation | Lower bound | Upper bound |
| Rituximab & R-CHOP                                    | 125           | 18                          | 34.572        | 44.22640267        | 0           | 123.0248053 |
| HD-MTX                                                | 81            | 20.75                       | 38.3382716    | 46.8522835         | 0           | 132.0428386 |
| Radiation                                             | 79            | 8.75                        | 13.72008439   | 18.48971358        | 0           | 50.69951155 |
| HD-MTX+ rituximab                                     | 40            | 25.4                        | 61.445        | 56.67639946        | 0           | 174.7977989 |
| Transplant                                            | 32            | 25.4                        | 59.8728125    | 55.18110317        | 0           | 170.2350188 |
| HD-MTX+ transplant                                    | 12            | 25.4                        | 53.7          | 51.05744251        | 0           | 155.814885  |
| Rituximab +transplant                                 | 11            | 20.5                        | 61.78181818   | 59.61165993        | 0           | 181.005138  |
| Corticosteroids                                       | 6             | 13                          | 13.66666667   | 6.187545094        | 1.291576479 | 26.04175685 |
| HD-MTX+ rituximab + transplant                        | 5             | 79.25                       | 90.5          | 67.8481761         | 0           | 226.1963522 |
| <b>Kruskal-Wallis chi-squared =69.849</b>             | <b>df = 8</b> | <b>p value =5.267e-12</b>   |               |                    |             |             |
| Pair                                                  | Z score       | Bonferroni adjusted p value |               |                    |             |             |
| HD-MTX+ rituximab - Radiation                         | 6.35409211    | 3.7739E-09                  |               |                    |             |             |
| Radiation - Transplant                                | -5.69482547   | 2.22297E-07                 |               |                    |             |             |
| HD-MTX - Radiation                                    | 4.89382139    | 1.78014E-05                 |               |                    |             |             |
| Radiation - Rituximab & R-CHOP                        | -4.38362727   | 0.000210095                 |               |                    |             |             |
| HD-MTX+ transplant - Radiation                        | 4.03225436    | 0.000994398                 |               |                    |             |             |
| Radiation - Rituximab +transplant                     | -3.66143811   | 0.004514462                 |               |                    |             |             |
| HD-MTX+ rituximab + transplant - Radiation            | 3.38964744    | 0.01259686                  |               |                    |             |             |
| HD-MTX+ rituximab - Rituximab & R-CHOP                | 3.31940784    | 0.01623754                  |               |                    |             |             |
| Rituximab & R-CHOP - Transplant                       | -2.84304368   | 0.0804329                   |               |                    |             |             |
| HD-MTX - HD-MTX+ rituximab                            | -2.37627711   | 0.3147898                   |               |                    |             |             |
| Corticosteroids - HD-MTX+ rituximab                   | -2.2445939    | 0.4462959                   |               |                    |             |             |
| Corticosteroids - HD-MTX+ rituximab +transplant       | -2.16793809   | 0.5429412                   |               |                    |             |             |
| Corticosteroids - Transplant                          | -2.11952381   | 0.612832                    |               |                    |             |             |
| HD-MTX+ transplant - Rituximab & R-CHOP               | 2.04899789    | 0.7283218                   |               |                    |             |             |
| HD-MTX+ rituximab + transplant - Rituximab & R-CHOP   | 2.04590106    | 0.7337899                   |               |                    |             |             |
| HD-MTX - Transplant                                   | -2.00899026   | 0.801687                    |               |                    |             |             |
| Corticosteroids - HD-MTX+ transplant                  | -1.99782643   | 0.8232387                   |               |                    |             |             |
| Corticosteroids - HD-MTX                              | -1.23720922   | 1                           |               |                    |             |             |
| HD-MTX - HD-MTX+ rituximab + transplant               | -1.71283319   | 1                           |               |                    |             |             |
| HD-MTX+ rituximab - HD-MTX+ rituximab +transplant     | -0.69585722   | 1                           |               |                    |             |             |
| HD-MTX - HD-MTX+ transplant                           | -1.5370861    | 1                           |               |                    |             |             |
| HD-MTX+ rituximab - HD-MTX+ transplant                | -0.04932722   | 1                           |               |                    |             |             |
| HD-MTX+ rituximab + transplant - HD-MTX+ transplant   | 0.58959985    | 1                           |               |                    |             |             |
| Corticosteroids - Radiation                           | 0.5912616     | 1                           |               |                    |             |             |
| Corticosteroids - Rituximab & R-CHOP                  | -0.90846787   | 1                           |               |                    |             |             |
| HD-MTX - Rituximab & R-CHOP                           | 1.00803312    | 1                           |               |                    |             |             |
| Corticosteroids - Rituximab + transplant              | -1.8283826    | 1                           |               |                    |             |             |
| HD-MTX - Rituximab + transplant                       | -1.25875084   | 1                           |               |                    |             |             |
| HD-MTX+ rituximab - Rituximab +transplant             | 0.16078029    | 1                           |               |                    |             |             |
| HD-MTX+ rituximab +transplant - Rituximab +transplant | 0.71346128    | 1                           |               |                    |             |             |
| HD-MTX+ transplant - Rituximab +transplant            | 0.17002852    | 1                           |               |                    |             |             |
| Rituximab & R-CHOP - Rituximab +transplant            | -1.74329176   | 1                           |               |                    |             |             |
| HD-MTX+ rituximab - Transplant                        | 0.16759049    | 1                           |               |                    |             |             |
| HD-MTX+ rituximab +transplant - Transplant            | 0.76904446    | 1                           |               |                    |             |             |
| HD-MTX+ transplant - Transplant                       | 0.16538519    | 1                           |               |                    |             |             |
| Rituximab +transplant - Transplant                    | -0.04289046   | 1                           |               |                    |             |             |



**Supplemental Table 6:** Analysis of B-cell histologies on (A) OS, (B) treatment 1 to progression, (C) symptom onset to diagnosis, and (D) symptom onset to death periods.

**6A**

| Overall Survival                                                  |             |                   |               |                    |             |             |
|-------------------------------------------------------------------|-------------|-------------------|---------------|--------------------|-------------|-------------|
| Types of B-cell lymphoma                                          | N           | Median (months)   | Mean (months) | Standard deviation | Lower bound | Upper bound |
| Diffuse large B-cell                                              | 250         | 10                | 10.1106       | 7.10632653         | 5.89140494  | 34.3262531  |
| Unspecified B-cell                                                | 15          | 5                 | 22.8969667    | 39.9328875         | 0           | 102.752422  |
| Follicular                                                        | 13          | 10                | 25.44769251   | 2.683281573        | 20.08112916 | 30.81425545 |
| IVL                                                               | 12          | 9.4               | 10.2          | #REF!              | #REF!       | #REF!       |
| Burkitt                                                           | 11          | 2.8               | 3.69454545    | 2.89239268         | 0           | 9.47873079  |
| Lymphoplasmacytic                                                 | 11          | 18                | 25.58181818   | 25.36135193        | 0           | 77.30452218 |
| High-grade B-cell                                                 | 9           | 4                 | 8.068888889   | 10.10779485        | 0           | 28.302969   |
| CLL/SLL                                                           | 8           | 17                | 38.75         | 39.44952346        | 0           | 111.640169  |
| Mantle cell                                                       | 8           | 7.45              | 8.05          | 46.722332          | 0           | 116.486164  |
| Marginal zone                                                     | 7           | 25.4              | 39.94285714   | 47.1964872         | 0           | 151.2557305 |
| Low-grade B-cell                                                  | 6           | 81.7              | 81.7          | 61.67359948        | 0           | 205.04712   |
| Intermediate & triple-hit B-cell                                  | 2           | 3                 | 3             | 4.24264087         | 0           | 11.48528137 |
| MALT                                                              | 1           | 0                 | 0             | N/A                | N/A         | N/A         |
| Acute lymphoblastic leukemia                                      | 1           | 27                | 27            | N/A                | N/A         | N/A         |
| Plasma cell leukemia                                              | 1           | 38                | 38            | N/A                | N/A         | N/A         |
| N/A=Not applicable                                                |             |                   |               |                    |             |             |
| Kruskal-Wallis chi-squared = 36.033                               | df = 14     | p value = 0.01032 |               |                    |             |             |
|                                                                   |             | Bonferroni        |               |                    |             |             |
| Pair                                                              | Z score     | adjusted p value  |               |                    |             |             |
| Burkitt vs. Low-grade B-cell                                      | -4.02745334 | 0.00282824        |               |                    |             |             |
| Low-grade B-cell vs. Unspecified B-cell                           | -3.57577872 | 0.06332314        |               |                    |             |             |
| High-grade B-cell vs. Low-grade B-cell                            | -3.2005111  | 0.0719966         |               |                    |             |             |
| IVL vs. Low-grade B-cell                                          | -3.09852628 | 0.101829675       |               |                    |             |             |
| Diffuse large B-cell vs. Low-grade B-cell                         | -3.0827462  | 0.12728326        |               |                    |             |             |
| Intermediate & triple-hit B-cell vs. Low-grade B-cell             | -2.7540749  | 0.308597859       |               |                    |             |             |
| Burkitt vs. Marginal zone                                         | -2.72324658 | 0.3387881         |               |                    |             |             |
| Burkitt vs. Lymphoplasmacytic                                     | -2.71879582 | 0.34090228        |               |                    |             |             |
| Low-grade B-cell vs. Mantle cell                                  | -2.7166837  | 0.346228788       |               |                    |             |             |
| Burkitt vs. Diffuse large B-cell                                  | -2.68340222 | 0.382605739       |               |                    |             |             |
| Low-grade B-cell vs. MALT                                         | -2.6228112  | 0.45725872        |               |                    |             |             |
| Burkitt vs. Follicular                                            | -2.46073783 | 0.72792129        |               |                    |             |             |
| Acute lymphoblastic leukemia vs. Burkitt                          | 1.85814389  | 1                 |               |                    |             |             |
| Acute lymphoblastic leukemia vs. CLL/SLL                          | 0.82212726  | 1                 |               |                    |             |             |
| Burkitt vs. CLL/SLL                                               | -2.3896336  | 1                 |               |                    |             |             |
| Acute lymphoblastic leukemia vs. Diffuse large B-cell             | 1.11222829  | 1                 |               |                    |             |             |
| CLL/SLL vs. Diffuse large B-cell                                  | 0.6570138   | 1                 |               |                    |             |             |
| Acute lymphoblastic leukemia vs. Follicular                       | 0.89909614  | 1                 |               |                    |             |             |
| CLL/SLL vs. Follicular                                            | 0.12142343  | 1                 |               |                    |             |             |
| Diffuse large B-cell vs. Follicular                               | -0.6377273  | 1                 |               |                    |             |             |
| Acute lymphoblastic leukemia vs. High-grade B-cell                | 1.49902511  | 1                 |               |                    |             |             |
| Burkitt vs. High-grade B-cell                                     | -0.8732826  | 1                 |               |                    |             |             |
| CLL/SLL vs. High-grade B-cell                                     | 1.37887934  | 1                 |               |                    |             |             |
| Diffuse large B-cell vs. High-grade B-cell                        | 1.2929057   | 1                 |               |                    |             |             |
| Follicular vs. High-grade B-cell                                  | 1.41930577  | 1                 |               |                    |             |             |
| Acute lymphoblastic leukemia vs. Intermediate & triple-hit B-cell | 1.7253289   | 1                 |               |                    |             |             |
| Burkitt vs. Intermediate & triple-hit B-cell                      | 0.2221147   | 1                 |               |                    |             |             |
| CLL/SLL vs. Intermediate & triple-hit B-cell                      | 1.53853406  | 1                 |               |                    |             |             |
| Diffuse large B-cell vs. Intermediate & triple-hit B-cell         | 1.4322263   | 1                 |               |                    |             |             |
| Follicular vs. Intermediate & triple-hit B-cell                   | 1.5939161   | 1                 |               |                    |             |             |
| High-grade B-cell vs. Intermediate & triple-hit B-cell            | 0.7191107   | 1                 |               |                    |             |             |
| Acute lymphoblastic leukemia vs. IVL                              | 1.35889505  | 1                 |               |                    |             |             |
| Burkitt vs. IVL                                                   | -1.2639281  | 1                 |               |                    |             |             |
| CLL/SLL vs. IVL                                                   | 1.1672742   | 1                 |               |                    |             |             |
| Diffuse large B-cell vs. IVL                                      | 1.00435789  | 1                 |               |                    |             |             |
| Follicular vs. IVL                                                | 1.19460386  | 1                 |               |                    |             |             |
| High-grade B-cell vs. IVL                                         | -0.31120411 | 1                 |               |                    |             |             |
| Intermediate & triple-hit B-cell vs. IVL                          | -0.91570704 | 1                 |               |                    |             |             |
| Acute lymphoblastic leukemia vs. Low-grade B-cell                 | -0.12819612 | 1                 |               |                    |             |             |
| CLL/SLL vs. Low-grade B-cell                                      | -1.18248949 | 1                 |               |                    |             |             |
| Follicular vs. Low-grade B-cell                                   | -2.1703053  | 1                 |               |                    |             |             |
| Acute lymphoblastic leukemia vs. Lymphoplasmacytic                | 0.74855115  | 1                 |               |                    |             |             |
| CLL/SLL vs. Lymphoplasmacytic                                     | -0.2197419  | 1                 |               |                    |             |             |
| Diffuse large B-cell vs. Lymphoplasmacytic                        | -1.0795951  | 1                 |               |                    |             |             |
| Follicular vs. Lymphoplasmacytic                                  | -0.39907458 | 1                 |               |                    |             |             |
| High-grade B-cell vs. Lymphoplasmacytic                           | -1.70569358 | 1                 |               |                    |             |             |
| Intermediate & triple-hit B-cell vs. Lymphoplasmacytic            | -1.72862804 | 1                 |               |                    |             |             |
| IVL vs. Lymphoplasmacytic                                         | -1.50787882 | 1                 |               |                    |             |             |
| Low-grade B-cell vs. Lymphoplasmacytic                            | 1.8132106   | 1                 |               |                    |             |             |
| Acute lymphoblastic leukemia vs. MALT                             | 1.90366028  | 1                 |               |                    |             |             |
| Burkitt vs. MALT                                                  | 0.72178133  | 1                 |               |                    |             |             |
| CLL/SLL vs. MALT                                                  | 1.71264761  | 1                 |               |                    |             |             |
| Diffuse large B-cell vs. MALT                                     | 1.57740862  | 1                 |               |                    |             |             |
| Follicular vs. MALT                                               | 1.69788107  | 1                 |               |                    |             |             |
| High-grade B-cell vs. MALT                                        | 1.0276846   | 1                 |               |                    |             |             |
| Intermediate & triple-hit B-cell vs. MALT                         | 0.47133026  | 1                 |               |                    |             |             |
| IVL vs. MALT                                                      | 1.28338739  | 1                 |               |                    |             |             |
| Lymphoplasmacytic vs. MALT                                        | 1.83172507  | 1                 |               |                    |             |             |
| Acute lymphoblastic leukemia vs. Mantle cell                      | 1.25277004  | 1                 |               |                    |             |             |
| Burkitt vs. Mantle cell                                           | -1.31789072 | 1                 |               |                    |             |             |
| CLL/SLL vs. Mantle cell                                           | 0.90057951  | 1                 |               |                    |             |             |
| Diffuse large B-cell vs. Mantle cell                              | 0.5969685   | 1                 |               |                    |             |             |
| Follicular vs. Mantle cell                                        | 0.88064894  | 1                 |               |                    |             |             |
| High-grade B-cell vs. Mantle cell                                 | -0.45219057 | 1                 |               |                    |             |             |
| Intermediate & triple-hit B-cell vs. Mantle cell                  | -0.96900849 | 1                 |               |                    |             |             |
| IVL vs. Mantle cell                                               | -0.18074199 | 1                 |               |                    |             |             |
| Lymphoplasmacytic vs. Mantle cell                                 | 1.17707475  | 1                 |               |                    |             |             |
| MALT vs. Mantle cell                                              | -1.38311096 | 1                 |               |                    |             |             |
| Acute lymphoblastic leukemia vs. Marginal zone                    | 0.5841292   | 1                 |               |                    |             |             |
| CLL/SLL vs. Marginal zone                                         | -0.4079999  | 1                 |               |                    |             |             |
| Diffuse large B-cell vs. Marginal zone                            | -1.27861452 | 1                 |               |                    |             |             |
| Follicular vs. Marginal zone                                      | -0.65821463 | 1                 |               |                    |             |             |
| High-grade B-cell vs. Marginal zone                               | -1.83356132 | 1                 |               |                    |             |             |
| Intermediate & triple-hit B-cell vs. Marginal zone                | -1.85359555 | 1                 |               |                    |             |             |
| IVL vs. Marginal zone                                             | -1.6543491  | 1                 |               |                    |             |             |
| Low-grade B-cell vs. Marginal zone                                | 1.37119631  | 1                 |               |                    |             |             |
| Lymphoplasmacytic vs. Marginal zone                               | -0.32549705 | 1                 |               |                    |             |             |
| MALT vs. Marginal zone                                            | -1.6968224  | 1                 |               |                    |             |             |
| Mantle cell vs. Marginal zone                                     | -1.3603428  | 1                 |               |                    |             |             |
| Acute lymphoblastic leukemia vs. Plasma cell leukemia             | -0.07880316 | 1                 |               |                    |             |             |
| Burkitt vs. Plasma cell leukemia                                  | -1.98529595 | 1                 |               |                    |             |             |
| CLL/SLL vs. Plasma cell leukemia                                  | -0.62334784 | 1                 |               |                    |             |             |
| Diffuse large B-cell vs. Plasma cell leukemia                     | -1.2240494  | 1                 |               |                    |             |             |
| Follicular vs. Plasma cell leukemia                               | -1.00953171 | 1                 |               |                    |             |             |
| High-grade B-cell vs. Plasma cell leukemia                        | -1.57479461 | 1                 |               |                    |             |             |
| Intermediate & triple-hit B-cell vs. Plasma cell leukemia         | -1.81408503 | 1                 |               |                    |             |             |
| IVL vs. Plasma cell leukemia                                      | -1.4630423  | 1                 |               |                    |             |             |
| Low-grade B-cell vs. Plasma cell leukemia                         | 0.02691536  | 1                 |               |                    |             |             |
| Lymphoplasmacytic vs. Plasma cell leukemia                        | -0.85529581 | 1                 |               |                    |             |             |
| MALT vs. Plasma cell leukemia                                     | -1.98446644 | 1                 |               |                    |             |             |
| Mantle cell vs. Plasma cell leukemia                              | -1.25788489 | 1                 |               |                    |             |             |
| Marginal zone vs. Plasma cell leukemia                            | -0.68841963 | 1                 |               |                    |             |             |
| Acute lymphoblastic leukemia vs. Unspecified B-cell               | 1.35425115  | 1                 |               |                    |             |             |
| Burkitt vs. Unspecified B-cell                                    | -1.83739395 | 1                 |               |                    |             |             |
| CLL/SLL vs. Unspecified B-cell                                    | 1.31632843  | 1                 |               |                    |             |             |
| Diffuse large B-cell vs. Unspecified B-cell                       | 2.1556231   | 1                 |               |                    |             |             |
| Follicular vs. Unspecified B-cell                                 | 1.45746185  | 1                 |               |                    |             |             |
| High-grade B-cell vs. Unspecified B-cell                          | -0.54287272 | 1                 |               |                    |             |             |
| Intermediate & triple-hit B-cell vs. Unspecified B-cell           | -1.03165966 | 1                 |               |                    |             |             |
| IVL vs. Unspecified B-cell                                        | -0.16757539 | 1                 |               |                    |             |             |
| Lymphoplasmacytic vs. Unspecified B-cell                          | 1.8301323   | 1                 |               |                    |             |             |
| MALT vs. Unspecified B-cell                                       | -1.32870119 | 1                 |               |                    |             |             |
| Mantle cell vs. Unspecified B-cell                                | 0.08625191  | 1                 |               |                    |             |             |
| Marginal zone vs. Unspecified B-cell                              | 1.8883171   | 1                 |               |                    |             |             |
| Plasma cell leukemia vs. Unspecified B-cell                       | 1.48524347  | 1                 |               |                    |             |             |

# 6B

| Time from Treatment 1 to Progression                  |                |                                    |                         |                    |             |             |
|-------------------------------------------------------|----------------|------------------------------------|-------------------------|--------------------|-------------|-------------|
| Types of B-cell lymphoma                              | N              | Median (months)                    | Mean (months)           | Standard deviation | Lower bound | Upper bound |
| Unspecified B-cell                                    | 62             | 16.5                               | 19.16807018             | 16.83790912        | 0           | 52.84388841 |
| High-grade B-cell                                     | 6              | 11                                 | 11                      | 0                  | 11          | 11          |
| B acute lymphoblastic leukemia                        | 6              | 9.4                                | 9.4                     | 0                  | 9.4         | 9.4         |
| Mantle cell                                           | 3              | 12                                 | 14.6                    | 5.392587505        | 3.81482499  | 25.38517501 |
| Burkitt                                               | 3              | 11                                 | 8.333333333             | 5.507570547        | 0           | 19.34847443 |
| MALT                                                  | 2              | 14                                 | 14                      | 18.38477631        | 0           | 50.76955262 |
| Diffuse large B-cell                                  | 2              | 28.4                               | 28.4                    | 10.74802307        | 6.903953852 | 49.89604615 |
| CLL/SLL                                               | 2              | 10.2                               | 10.2                    | 1.13137085         | 7.9372583   | 12.4627417  |
| Marginal zone                                         | 2              | 2.48                               | 2.48                    | 2.099036072        | 0           | 6.666072145 |
| IVL                                                   | 1              | 7                                  | 7                       | N/A                | N/A         | N/A         |
| Follicular                                            | 1              | 1                                  | 1                       | N/A                | N/A         | N/A         |
| Lymphoplasmacytic                                     | 0              | N/A                                | N/A                     | N/A                | N/A         | N/A         |
| Low-grade B-cell                                      | 0              | N/A                                | N/A                     | N/A                | N/A         | N/A         |
| Intermediate & triple-hit B-cell                      | 0              | N/A                                | N/A                     | N/A                | N/A         | N/A         |
| Plasma cell leukemia                                  | 0              | N/A                                | N/A                     | N/A                | N/A         | N/A         |
| N/A = Not applicable                                  |                |                                    |                         |                    |             |             |
| <b>Kruskal-Wallis chi-squared = 9.9899</b>            |                | <b>df = 10</b>                     | <b>p value = 0.4414</b> |                    |             |             |
| <b>Pair</b>                                           | <b>Z score</b> | <b>Bonferroni adjusted p value</b> |                         |                    |             |             |
| Diffuse large B-cell - Marginal zone                  | 2.1866359      | 0.7911507                          |                         |                    |             |             |
| B acute lymphoblastic leukemia - Burkitt              | 0.09162578     | 1                                  |                         |                    |             |             |
| B acute lymphoblastic leukemia - CLL/SLL              | -0.19044061    | 1                                  |                         |                    |             |             |
| Burkitt - CLL/SLL                                     | -0.24130829    | 1                                  |                         |                    |             |             |
| B acute lymphoblastic leukemia - Diffuse large B-cell | -1.38069443    | 1                                  |                         |                    |             |             |
| Burkitt - Diffuse large B-cell                        | -1.30590367    | 1                                  |                         |                    |             |             |
| CLL/SLL - Diffuse large B-cell                        | -0.97188818    | 1                                  |                         |                    |             |             |
| B acute lymphoblastic leukemia - Follicular           | 1.20566141     | 1                                  |                         |                    |             |             |
| Burkitt - Follicular                                  | 1.07168887     | 1                                  |                         |                    |             |             |
| CLL/SLL - Follicular                                  | 1.19025382     | 1                                  |                         |                    |             |             |
| Diffuse large B-cell - Follicular                     | 1.98875637     | 1                                  |                         |                    |             |             |
| B acute lymphoblastic leukemia - High-grade B-cell    | -0.53864739    | 1                                  |                         |                    |             |             |
| Burkitt - High-grade B-cell                           | -0.53142954    | 1                                  |                         |                    |             |             |
| CLL/SLL - High-grade B-cell                           | -0.19044061    | 1                                  |                         |                    |             |             |
| Diffuse large B-cell - High-grade B-cell              | 0.99981321     | 1                                  |                         |                    |             |             |
| Follicular - High-grade B-cell                        | -1.49358055    | 1                                  |                         |                    |             |             |
| B acute lymphoblastic leukemia - IVL                  | 0.14395957     | 1                                  |                         |                    |             |             |
| Burkitt - IVL                                         | 0.07855274     | 1                                  |                         |                    |             |             |
| CLL/SLL - IVL                                         | 0.25392082     | 1                                  |                         |                    |             |             |
| Diffuse large B-cell - IVL                            | 1.04742336     | 1                                  |                         |                    |             |             |
| Follicular - IVL                                      | -0.81088817    | 1                                  |                         |                    |             |             |
| High-grade B-cell - IVL                               | 0.43187871     | 1                                  |                         |                    |             |             |
| B acute lymphoblastic leukemia - MALT                 | 0.22614823     | 1                                  |                         |                    |             |             |
| Burkitt - MALT                                        | 0.1313001      | 1                                  |                         |                    |             |             |
| CLL/SLL - MALT                                        | 0.34014336     | 1                                  |                         |                    |             |             |
| Diffuse large B-cell - MALT                           | 1.31198154     | 1                                  |                         |                    |             |             |
| Follicular - MALT                                     | -0.91252793    | 1                                  |                         |                    |             |             |
| High-grade B-cell - MALT                              | 0.60702945     | 1                                  |                         |                    |             |             |
| IVL - MALT                                            | 0.02380508     | 1                                  |                         |                    |             |             |
| B acute lymphoblastic leukemia - Mantle cell          | -0.76965657    | 1                                  |                         |                    |             |             |
| Burkitt - Mantle cell                                 | -0.7458924     | 1                                  |                         |                    |             |             |
| CLL/SLL - Mantle cell                                 | -0.42588815    | 1                                  |                         |                    |             |             |
| Diffuse large B-cell - Mantle cell                    | 0.63875723     | 1                                  |                         |                    |             |             |
| Follicular - Mantle cell                              | -1.59910944    | 1                                  |                         |                    |             |             |
| High-grade B-cell - Mantle cell                       | -0.32985282    | 1                                  |                         |                    |             |             |
| IVL - Mantle cell                                     | -0.60597832    | 1                                  |                         |                    |             |             |
| MALT - Mantle cell                                    | -0.79844654    | 1                                  |                         |                    |             |             |
| B acute lymphoblastic leukemia - Marginal zone        | 1.29737667     | 1                                  |                         |                    |             |             |
| Burkitt - Marginal zone                               | 1.08943594     | 1                                  |                         |                    |             |             |
| CLL/SLL - Marginal zone                               | 1.21479772     | 1                                  |                         |                    |             |             |
| Follicular - Marginal zone                            | -0.19837564    | 1                                  |                         |                    |             |             |
| High-grade B-cell - Marginal zone                     | 1.67825789     | 1                                  |                         |                    |             |             |
| IVL - Marginal zone                                   | 0.73795737     | 1                                  |                         |                    |             |             |
| MALT - Marginal zone                                  | 0.87465436     | 1                                  |                         |                    |             |             |
| Mantle cell - Marginal zone                           | 1.75658238     | 1                                  |                         |                    |             |             |
| B acute lymphoblastic leukemia - Unspecified B-cell   | -0.91728984    | 1                                  |                         |                    |             |             |
| Burkitt - Unspecified B-cell                          | -0.77301919    | 1                                  |                         |                    |             |             |
| CLL/SLL - Unspecified B-cell                          | -0.32945801    | 1                                  |                         |                    |             |             |
| Diffuse large B-cell - Unspecified B-cell             | 1.02328348     | 1                                  |                         |                    |             |             |
| Follicular - Unspecified B-cell                       | -1.6809451     | 1                                  |                         |                    |             |             |
| High-grade B-cell - Unspecified B-cell                | -0.18991053    | 1                                  |                         |                    |             |             |
| IVL - Unspecified B-cell                              | -0.5433138     | 1                                  |                         |                    |             |             |
| MALT - Unspecified B-cell                             | -0.80291753    | 1                                  |                         |                    |             |             |
| Mantle cell - Unspecified B-cell                      | 0.25720168     | 1                                  |                         |                    |             |             |
| Marginal zone - Unspecified B-cell                    | -2.02038487    | 1                                  |                         |                    |             |             |
| Lymphoplasmacytic - MALT                              | 1.00783217     | 1                                  |                         |                    |             |             |
| B acute lymphoblastic leukemia - Mantle cell          | -0.40154821    | 1                                  |                         |                    |             |             |

| Time from Symptom Onset to Diagnosis                      |              |                 |                  |                    |             |             |
|-----------------------------------------------------------|--------------|-----------------|------------------|--------------------|-------------|-------------|
|                                                           | N            | Median (months) | Mean (months)    | Standard deviation | Lower bound | Upper bound |
| Types of B-cell lymphoma                                  |              |                 |                  |                    |             |             |
| Unspecified B-cell                                        | 76           | 3               | 9.72484205       | 18.9004251         | 0           | 42.53769281 |
| Diffuse large B-cell                                      | 7            | 3               | 5.214285714      | 5.804272438        | 0           | 16.81683059 |
| Lymphoplasmacytic                                         | 3            | 36              | 32               | 30.18623774        | 0           | 92.3887548  |
| Follicular                                                | 2            | 1.75            | 1.75             | 1.76776953         | 0           | 5.26533606  |
| Burkitt                                                   | 2            | 25              | 25               | 2.12323844         | 0           | 6.74264087  |
| Mantle cell                                               | 2            | 7               | 7                | 1.414213562        | 4.171572875 | 9.828427125 |
| Marginal zone                                             | 1            | 5               | 5                | N/A                | N/A         | N/A         |
| CLL/SLL                                                   | 1            | 1               | 1                | N/A                | N/A         | N/A         |
| IVL                                                       | 0            | N/A             | N/A              | N/A                | N/A         | N/A         |
| Low-grade B-cell                                          | 0            | N/A             | N/A              | N/A                | N/A         | N/A         |
| High-grade B-cell                                         | 0            | N/A             | N/A              | N/A                | N/A         | N/A         |
| MALT                                                      | 0            | N/A             | N/A              | N/A                | N/A         | N/A         |
| Intermediate & triple-hit B-cell                          | 0            | N/A             | N/A              | N/A                | N/A         | N/A         |
| Acute lymphoblastic leukemia                              | 0            | N/A             | N/A              | N/A                | N/A         | N/A         |
| Plasma cell leukemia                                      | 0            | N/A             | N/A              | N/A                | N/A         | N/A         |
| N/A = Not applicable                                      |              |                 |                  |                    |             |             |
| Kruskal-Wallis chi-squared = 4.9476                       |              | df = 7          | p value = 0.6664 |                    |             |             |
| Pair                                                      |              |                 |                  |                    |             |             |
|                                                           | Z score      | Bonferroni      |                  | adjusted p value   |             |             |
| Burkitt vs. CLL/SLL                                       | 0.6238542    | 1               |                  |                    |             |             |
| Burkitt vs. Diffuse large B-cell                          | -0.5851668   | 1               |                  |                    |             |             |
| CLL/SLL vs. Diffuse large B-cell                          | -1.13771138  | 1               |                  |                    |             |             |
| Burkitt vs. Follicular                                    | 0.39538188   | 1               |                  |                    |             |             |
| CLL/SLL vs. Follicular                                    | -0.30038233  | 1               |                  |                    |             |             |
| Diffuse large B-cell vs. Follicular                       | 1.03525997   | 1               |                  |                    |             |             |
| Burkitt vs. Lymphoplasmacytic                             | -0.80861845  | 1               |                  |                    |             |             |
| CLL/SLL vs. Lymphoplasmacytic                             | -1.38015485  | 1               |                  |                    |             |             |
| Diffuse large B-cell vs. Lymphoplasmacytic                | -0.54690807  | 1               |                  |                    |             |             |
| Follicular vs. Lymphoplasmacytic                          | -1.3429052   | 1               |                  |                    |             |             |
| Burkitt vs. Mantle cell                                   | -1.14927813  | 1               |                  |                    |             |             |
| CLL/SLL vs. Mantle cell                                   | -1.56146708  | 1               |                  |                    |             |             |
| Diffuse large B-cell vs. Mantle cell                      | -0.29323389  | 1               |                  |                    |             |             |
| Follicular vs. Mantle cell                                | -1.5466268   | 1               |                  |                    |             |             |
| Lymphoplasmacytic vs. Mantle cell                         | -0.34015485  | 1               |                  |                    |             |             |
| Burkitt vs. Marginal zone                                 | -0.74316828  | 1               |                  |                    |             |             |
| CLL/SLL vs. Marginal zone                                 | -1.18328839  | 1               |                  |                    |             |             |
| Diffuse large B-cell vs. Marginal zone                    | -0.42756324  | 1               |                  |                    |             |             |
| Follicular vs. Marginal zone                              | -1.09600257  | 1               |                  |                    |             |             |
| Lymphoplasmacytic vs. Marginal zone                       | -0.25900775  | 1               |                  |                    |             |             |
| Mantle cell vs. Marginal zone                             | 0.19538739   | 1               |                  |                    |             |             |
| Burkitt vs. Unspecified B-cell                            | -0.46463315  | 1               |                  |                    |             |             |
| CLL/SLL vs. Unspecified B-cell                            | -1.10300019  | 1               |                  |                    |             |             |
| Diffuse large B-cell vs. Unspecified B-cell               | 0.2682357    | 1               |                  |                    |             |             |
| Follicular vs. Unspecified B-cell                         | -1.02659021  | 1               |                  |                    |             |             |
| Lymphoplasmacytic vs. Unspecified B-cell                  | 0.82112294   | 1               |                  |                    |             |             |
| Mantle cell vs. Unspecified B-cell                        | 1.11586875   | 1               |                  |                    |             |             |
| Marginal zone vs. Unspecified B-cell                      | 0.55635726   | 1               |                  |                    |             |             |
| Follicular vs. IVL                                        | 0            | 1               |                  |                    |             |             |
| High-grade B-cell vs. IVL                                 | 0.56287083   | 1               |                  |                    |             |             |
| Intermediate & triple-hit B-cell vs. IVL                  | 0            | 1               |                  |                    |             |             |
| Acute lymphoblastic leukemia vs. Low-grade B-cell         | 0            | 1               |                  |                    |             |             |
| Burkitt vs. Low-grade B-cell                              | 1.05262469   | 1               |                  |                    |             |             |
| CLL/SLL vs. Low-grade B-cell                              | 1.36025328   | 1               |                  |                    |             |             |
| Diffuse large B-cell vs. Low-grade B-cell                 | 1.83081683   | 1               |                  |                    |             |             |
| Follicular vs. Low-grade B-cell                           | 0            | 1               |                  |                    |             |             |
| High-grade B-cell vs. Low-grade B-cell                    | 0.51847827   | 1               |                  |                    |             |             |
| Intermediate & triple-hit B-cell vs. Low-grade B-cell     | 0            | 1               |                  |                    |             |             |
| IVL vs. Low-grade B-cell                                  | 0            | 1               |                  |                    |             |             |
| Acute lymphoblastic leukemia vs. Lymphoplasmacytic        | -0.18907285  | 1               |                  |                    |             |             |
| Burkitt vs. Lymphoplasmacytic                             | -0.00047149  | 1               |                  |                    |             |             |
| CLL/SLL vs. Lymphoplasmacytic                             | 0.97383709   | 1               |                  |                    |             |             |
| Diffuse large B-cell vs. Lymphoplasmacytic                | 1.26552607   | 1               |                  |                    |             |             |
| Follicular vs. Lymphoplasmacytic                          | -0.50005575  | 1               |                  |                    |             |             |
| High-grade B-cell vs. Lymphoplasmacytic                   | 0.07096973   | 1               |                  |                    |             |             |
| Intermediate & triple-hit B-cell vs. Lymphoplasmacytic    | -0.30723851  | 1               |                  |                    |             |             |
| IVL vs. Lymphoplasmacytic                                 | -0.5426977   | 1               |                  |                    |             |             |
| Low-grade B-cell vs. Lymphoplasmacytic                    | -0.46569204  | 1               |                  |                    |             |             |
| Acute lymphoblastic leukemia vs. MALT                     | 0            | 1               |                  |                    |             |             |
| Burkitt vs. MALT                                          | 0.80821407   | 1               |                  |                    |             |             |
| CLL/SLL vs. MALT                                          | 1.08688945   | 1               |                  |                    |             |             |
| Diffuse large B-cell vs. MALT                             | 1.19350626   | 1               |                  |                    |             |             |
| Follicular vs. MALT                                       | 0            | 1               |                  |                    |             |             |
| High-grade B-cell vs. MALT                                | 0.40513111   | 1               |                  |                    |             |             |
| Intermediate & triple-hit B-cell vs. MALT                 | 0            | 1               |                  |                    |             |             |
| IVL vs. MALT                                              | 0            | 1               |                  |                    |             |             |
| Low-grade B-cell vs. MALT                                 | 0            | 1               |                  |                    |             |             |
| Lymphoplasmacytic vs. MALT                                | 0.36989526   | 1               |                  |                    |             |             |
| Acute lymphoblastic leukemia vs. Mantle cell              | -0.37225118  | 1               |                  |                    |             |             |
| Burkitt vs. Mantle cell                                   | 0.09487182   | 1               |                  |                    |             |             |
| CLL/SLL vs. Mantle cell                                   | 0.4545166    | 1               |                  |                    |             |             |
| Diffuse large B-cell vs. Mantle cell                      | 0.51121328   | 1               |                  |                    |             |             |
| Follicular vs. Mantle cell                                | -0.96785307  | 1               |                  |                    |             |             |
| High-grade B-cell vs. Mantle cell                         | -0.38641306  | 1               |                  |                    |             |             |
| Intermediate & triple-hit B-cell vs. Mantle cell          | -0.60028999  | 1               |                  |                    |             |             |
| IVL vs. Mantle cell                                       | -1.03964097  | 1               |                  |                    |             |             |
| Low-grade B-cell vs. Mantle cell                          | -0.94803802  | 1               |                  |                    |             |             |
| Lymphoplasmacytic vs. Mantle cell                         | -0.465262014 | 1               |                  |                    |             |             |
| MALT vs. Mantle cell                                      | -0.72291427  | 1               |                  |                    |             |             |
| Acute lymphoblastic leukemia vs. Marginal zone            | -0.36027886  | 1               |                  |                    |             |             |
| Burkitt vs. Marginal zone                                 | 0.04770516   | 1               |                  |                    |             |             |
| CLL/SLL vs. Marginal zone                                 | 0.44164403   | 1               |                  |                    |             |             |
| Diffuse large B-cell vs. Marginal zone                    | 0.4471634    | 1               |                  |                    |             |             |
| Follicular vs. Marginal zone                              | -1.01471883  | 1               |                  |                    |             |             |
| High-grade B-cell vs. Marginal zone                       | -0.40522268  | 1               |                  |                    |             |             |
| Intermediate & triple-hit B-cell vs. Marginal zone        | -0.6289052   | 1               |                  |                    |             |             |
| IVL vs. Marginal zone                                     | -1.03964094  | 1               |                  |                    |             |             |
| Low-grade B-cell vs. Marginal zone                        | -0.99501466  | 1               |                  |                    |             |             |
| Lymphoplasmacytic vs. Marginal zone                       | -0.5428546   | 1               |                  |                    |             |             |
| MALT vs. Marginal zone                                    | -0.7631414   | 1               |                  |                    |             |             |
| Mantle cell vs. Marginal zone                             | -0.04895864  | 1               |                  |                    |             |             |
| Acute lymphoblastic leukemia vs. Plasma cell leukemia     | 0            | 1               |                  |                    |             |             |
| Burkitt vs. Plasma cell leukemia                          | 0.40689334   | 1               |                  |                    |             |             |
| CLL/SLL vs. Plasma cell leukemia                          | 0.96790638   | 1               |                  |                    |             |             |
| Diffuse large B-cell vs. Plasma cell leukemia             | 0.5368128    | 1               |                  |                    |             |             |
| Follicular vs. Plasma cell leukemia                       | 0            | 1               |                  |                    |             |             |
| High-grade B-cell vs. Plasma cell leukemia                | 0.21166787   | 1               |                  |                    |             |             |
| Intermediate & triple-hit B-cell vs. Plasma cell leukemia | 0            | 1               |                  |                    |             |             |
| IVL vs. Plasma cell leukemia                              | 0            | 1               |                  |                    |             |             |
| Low-grade B-cell vs. Plasma cell leukemia                 | 0            | 1               |                  |                    |             |             |
| Lymphoplasmacytic vs. Plasma cell leukemia                | 0.18907285   | 1               |                  |                    |             |             |
| MALT vs. Plasma cell leukemia                             | 0            | 1               |                  |                    |             |             |
| Mantle cell vs. Plasma cell leukemia                      | 0.37225118   | 1               |                  |                    |             |             |
| Marginal zone vs. Plasma cell leukemia                    | 0.39027686   | 1               |                  |                    |             |             |
| Acute lymphoblastic leukemia vs. Unspecified B-cell       | -0.97138878  | 1               |                  |                    |             |             |
| Burkitt vs. Unspecified B-cell                            | -1.57324276  | 1               |                  |                    |             |             |
| CLL/SLL vs. Unspecified B-cell                            | -1.0210141   | 1               |                  |                    |             |             |
| Diffuse large B-cell vs. Unspecified B-cell               | -1.9040218   | 1               |                  |                    |             |             |
| High-grade B-cell vs. Unspecified B-cell                  | -1.96753831  | 1               |                  |                    |             |             |
| Intermediate & triple-hit B-cell vs. Unspecified B-cell   | -1.6033717   | 1               |                  |                    |             |             |
| Lymphoplasmacytic vs. Unspecified B-cell                  | -2.2610577   | 1               |                  |                    |             |             |
| MALT vs. Unspecified B-cell                               | -1.97416818  | 1               |                  |                    |             |             |
| Mantle cell vs. Unspecified B-cell                        | -1.65326939  | 1               |                  |                    |             |             |
| Marginal zone vs. Unspecified B-cell                      | -1.58795011  | 1               |                  |                    |             |             |
| Plasma cell leukemia vs. Unspecified B-cell               | -0.97138878  | 1               |                  |                    |             |             |

# 6D

| Time from Symptom Onset to Death                                  |             |                  |                   |                    |             |              |
|-------------------------------------------------------------------|-------------|------------------|-------------------|--------------------|-------------|--------------|
| Types of B-cell lymphoma                                          | N           | Median (no rths) | Mean (no rths)    | Standard deviation | Lower bound | Upper bound  |
| Diffuse large B-cell                                              | 263         | 10               | 21.93016031       | 32.8752773         | 0           | 87.68074421  |
| Unspecified B-cell                                                | 17          | 4                | 23.34117647       | 39.32246599        | 0           | 100.48355678 |
| Follicular                                                        | 13          | 10               | 25.44769251       | 38.51564441        | 0           | 102.4786821  |
| Burkitt                                                           | 12          | 3.14             | 4.553333333       | 4.011821924        | 0           | 12.57697718  |
| IVL                                                               | 12          | 9.4              | 10.2              | 11.0374668         | 0           | 32.36746676  |
| Lymphoplasmacytic                                                 | 11          | 18               | 26.03636364       | 26.55406355        | 0           | 83.14440074  |
| CLL/SLL                                                           | 9           | 10               | 45.11111111       | 33.30494333        | 0           | 102.9009423  |
| High-grade B-cell                                                 | 9           | 5                | 8.2               | 9.00002877         | 0           | 26.22003575  |
| Mantle cell                                                       | 8           | 8.95             | 23.4875           | 45.54038104        | 0           | 116.5736621  |
| Marginal zone                                                     | 8           | 18.7             | 32.95             | 45.0391768         | 0           | 126.12836    |
| Low-grade B-cell                                                  | 6           | 81.7             | 81.7              | 61.67355966        | 0           | 205.04712    |
| Intermediate & triple-hit B-cell                                  | 2           | 3                | 3                 | 4.24240087         | 0           | 11.48528137  |
| MALT                                                              | 1           | 0                | 0                 | N/A                | N/A         | N/A          |
| Acute lymphoblastic leukemia                                      | 1           | 7                | 7                 | N/A                | N/A         | N/A          |
| Plasma cell leukemia                                              | 1           | 38               | 38                | N/A                | N/A         | N/A          |
| N/A = Not applicable                                              |             |                  |                   |                    |             |              |
| Kruskal-Wallis chi-squared = 35.834                               |             | df= 14           | p value = 0.01105 |                    |             |              |
| Bonferroni adjusted p-value                                       |             |                  |                   |                    |             |              |
| Pair                                                              | Z score     |                  | Adjusted p-value  |                    |             |              |
| Burkitt vs. low grade B cell                                      | -4.2283388  | 0.00000000       |                   |                    |             |              |
| low grade B cell vs. Unspecified B cell                           | 3.55434003  | 0.000000316      |                   |                    |             |              |
| High-grade B-cell vs. low grade B-cell                            | -3.37032746 | 0.000416427      |                   |                    |             |              |
| IVL vs. low grade B-cell                                          | -3.20486973 | 0.001600273      |                   |                    |             |              |
| Diffuse large B-cell vs. low grade B-cell                         | -2.9740092  | 0.003804528      |                   |                    |             |              |
| Burkitt vs. Diffuse large B-cell                                  | -2.96370145 | 0.003871183      |                   |                    |             |              |
| Intermediate & triple-hit B-cell vs. low grade B-cell             | -2.8521489  | 0.0022760732     |                   |                    |             |              |
| Burkitt vs. lymphoplasmacytic                                     | -2.8193229  | 0.006832046      |                   |                    |             |              |
| low grade B-cell vs. Mantle cell                                  | 2.77740459  | 0.007620245      |                   |                    |             |              |
| low grade B-cell vs. MALT                                         | 2.6678283   | 0.000802682      |                   |                    |             |              |
| Burkitt vs. Marginal zone                                         | -2.53046517 | 0.006034818      |                   |                    |             |              |
| Burkitt vs. Follicular                                            | -2.42393746 | 0.006045544      |                   |                    |             |              |
| Acute lymphoblastic leukemia vs. Burkitt                          | 1.81742577  | 1                |                   |                    |             |              |
| Acute lymphoblastic leukemia vs. CLL/SLL                          | 0.90422457  | 1                |                   |                    |             |              |
| Burkitt vs. CLL/SLL                                               | -2.13561028 | 1                |                   |                    |             |              |
| Acute lymphoblastic leukemia vs. Diffuse large B-cell             | 1.03500854  | 1                |                   |                    |             |              |
| CLL/SLL vs. Diffuse large B-cell                                  | 0.18772511  | 1                |                   |                    |             |              |
| Acute lymphoblastic leukemia vs. Follicular                       | 0.88777659  | 1                |                   |                    |             |              |
| CLL/SLL vs. Follicular                                            | -0.09603796 | 1                |                   |                    |             |              |
| Diffuse large B-cell vs. Follicular                               | -0.33677162 | 1                |                   |                    |             |              |
| Acute lymphoblastic leukemia vs. High-grade B-cell                | 1.48430514  | 1                |                   |                    |             |              |
| Burkitt vs. High-grade B-cell                                     | -0.747170   | 1                |                   |                    |             |              |
| CLL/SLL vs. High-grade B-cell                                     | 1.30475633  | 1                |                   |                    |             |              |
| Diffuse large B-cell vs. High-grade B-cell                        | 1.61669402  | 1                |                   |                    |             |              |
| Follicular vs. High-grade B-cell                                  | 1.48450763  | 1                |                   |                    |             |              |
| Acute lymphoblastic leukemia vs. Intermediate & triple-hit B-cell | 1.73066015  | 1                |                   |                    |             |              |
| Burkitt vs. Intermediate & triple-hit B-cell                      | 0.2685222   | 1                |                   |                    |             |              |
| CLL/SLL vs. Intermediate & triple-hit B-cell                      | 1.48690775  | 1                |                   |                    |             |              |
| Diffuse large B-cell vs. Intermediate & triple-hit B-cell         | 1.93367424  | 1                |                   |                    |             |              |
| Follicular vs. Intermediate & triple-hit B-cell                   | 1.5781357   | 1                |                   |                    |             |              |
| High-grade B-cell vs. Intermediate & triple-hit B-cell            | 0.70960008  | 1                |                   |                    |             |              |
| Acute lymphoblastic leukemia vs. IVL                              | 1.37680611  | 1                |                   |                    |             |              |
| Burkitt vs. IVL                                                   | -1.11573283 | 1                |                   |                    |             |              |
| CLL/SLL vs. IVL                                                   | 1.30259311  | 1                |                   |                    |             |              |
| Diffuse large B-cell vs. IVL                                      | 1.4203257   | 1                |                   |                    |             |              |
| Follicular vs. IVL                                                | 1.2814268   | 1                |                   |                    |             |              |
| High-grade B-cell vs. IVL                                         | -0.20225007 | 1                |                   |                    |             |              |
| Intermediate & triple-hit B-cell vs. IVL                          | -0.86533685 | 1                |                   |                    |             |              |
| Acute lymphoblastic leukemia vs. low grade B-cell                 | -0.18962638 | 1                |                   |                    |             |              |
| CLL/SLL vs. low grade B-cell                                      | -2.2031792  | 1                |                   |                    |             |              |
| Follicular vs. low grade B-cell                                   | -2.24979722 | 1                |                   |                    |             |              |
| Acute lymphoblastic leukemia vs. lymphoplasmacytic                | 0.88768312  | 1                |                   |                    |             |              |
| CLL/SLL vs. lymphoplasmacytic                                     | -0.51483484 | 1                |                   |                    |             |              |
| Diffuse large B-cell vs. lymphoplasmacytic                        | -0.69970332 | 1                |                   |                    |             |              |
| Follicular vs. lymphoplasmacytic                                  | -0.40489048 | 1                |                   |                    |             |              |
| High-grade B-cell vs. lymphoplasmacytic                           | -1.88327482 | 1                |                   |                    |             |              |
| Intermediate & triple-hit B-cell vs. lymphoplasmacytic            | -1.82060699 | 1                |                   |                    |             |              |
| IVL vs. lymphoplasmacytic                                         | -1.71911487 | 1                |                   |                    |             |              |
| low grade B-cell vs. lymphoplasmacytic                            | 1.63218729  | 1                |                   |                    |             |              |
| Acute lymphoblastic leukemia vs. MALT                             | 1.38817505  | 1                |                   |                    |             |              |
| Burkitt vs. MALT                                                  | 0.74859213  | 1                |                   |                    |             |              |
| CLL/SLL vs. MALT                                                  | 1.65203109  | 1                |                   |                    |             |              |
| Diffuse large B-cell vs. MALT                                     | 1.68017207  | 1                |                   |                    |             |              |
| Follicular vs. MALT                                               | 1.68536947  | 1                |                   |                    |             |              |
| High-grade B-cell vs. MALT                                        | 1.08454852  | 1                |                   |                    |             |              |
| Intermediate & triple-hit B-cell vs. MALT                         | 0.1482739   | 1                |                   |                    |             |              |
| IVL vs. MALT                                                      | 1.18571859  | 1                |                   |                    |             |              |
| lymphoplasmacytic vs. MALT                                        | 1.38644249  | 1                |                   |                    |             |              |
| Acute lymphoblastic leukemia vs. Mantle cell                      | 1.2148996   | 1                |                   |                    |             |              |
| Burkitt vs. Mantle cell                                           | -1.3287986  | 1                |                   |                    |             |              |
| CLL/SLL vs. Mantle cell                                           | 0.69714548  | 1                |                   |                    |             |              |
| Diffuse large B-cell vs. Mantle cell                              | 0.75712802  | 1                |                   |                    |             |              |
| Follicular vs. Mantle cell                                        | 0.81736125  | 1                |                   |                    |             |              |
| High-grade B-cell vs. Mantle cell                                 | -0.59895428 | 1                |                   |                    |             |              |
| Intermediate & triple-hit B-cell vs. Mantle cell                  | -1.05148342 | 1                |                   |                    |             |              |
| IVL vs. Mantle cell                                               | -0.3203811  | 1                |                   |                    |             |              |
| lymphoplasmacytic vs. Mantle cell                                 | 1.2203188   | 1                |                   |                    |             |              |
| MALT vs. Mantle cell                                              | -1.30256714 | 1                |                   |                    |             |              |
| Acute lymphoblastic leukemia vs. Marginal zone                    | 0.69452004  | 1                |                   |                    |             |              |
| CLL/SLL vs. Marginal zone                                         | -0.4384983  | 1                |                   |                    |             |              |
| Diffuse large B-cell vs. Marginal zone                            | -0.78109204 | 1                |                   |                    |             |              |
| Follicular vs. Marginal zone                                      | -0.41080283 | 1                |                   |                    |             |              |
| High-grade B-cell vs. Marginal zone                               | -1.70407676 | 1                |                   |                    |             |              |
| Intermediate & triple-hit B-cell vs. Marginal zone                | -1.74878003 | 1                |                   |                    |             |              |
| IVL vs. Marginal zone                                             | -1.5325293  | 1                |                   |                    |             |              |
| low grade B-cell vs. Marginal zone                                | 1.75536303  | 1                |                   |                    |             |              |
| lymphoplasmacytic vs. Marginal zone                               | 0.0388552   | 1                |                   |                    |             |              |
| MALT vs. Marginal zone                                            | -1.8204969  | 1                |                   |                    |             |              |
| Mantle cell vs. Marginal zone                                     | -1.10410387 | 1                |                   |                    |             |              |
| Acute lymphoblastic leukemia vs. Plasma cell leukemia             | -0.13135131 | 1                |                   |                    |             |              |
| Burkitt vs. Plasma cell leukemia                                  | -1.96990385 | 1                |                   |                    |             |              |
| CLL/SLL vs. Plasma cell leukemia                                  | -1.0742785  | 1                |                   |                    |             |              |
| Diffuse large B-cell vs. Plasma cell leukemia                     | -1.20048572 | 1                |                   |                    |             |              |
| Follicular vs. Plasma cell leukemia                               | -1.0873163  | 1                |                   |                    |             |              |
| High-grade B-cell vs. Plasma cell leukemia                        | -1.66033281 | 1                |                   |                    |             |              |
| Intermediate & triple-hit B-cell vs. Plasma cell leukemia         | -1.88262558 | 1                |                   |                    |             |              |
| IVL vs. Plasma cell leukemia                                      | -1.58827739 | 1                |                   |                    |             |              |
| low grade B-cell vs. Plasma cell leukemia                         | 0.0264014   | 1                |                   |                    |             |              |
| lymphoplasmacytic vs. Plasma cell leukemia                        | -0.86580363 | 1                |                   |                    |             |              |
| MALT vs. Plasma cell leukemia                                     | -2.00953036 | 1                |                   |                    |             |              |
| Mantle cell vs. Plasma cell leukemia                              | -1.36033488 | 1                |                   |                    |             |              |
| Marginal zone vs. Plasma cell leukemia                            | -0.88995512 | 1                |                   |                    |             |              |
| Acute lymphoblastic leukemia vs. Unspecified B-cell               | 1.43490911  | 1                |                   |                    |             |              |
| Burkitt vs. Unspecified B-cell                                    | -1.1000469  | 1                |                   |                    |             |              |
| CLL/SLL vs. Unspecified B-cell                                    | 1.27733876  | 1                |                   |                    |             |              |
| Diffuse large B-cell vs. Unspecified B-cell                       | 1.83628406  | 1                |                   |                    |             |              |
| Follicular vs. Unspecified B-cell                                 | 1.50594823  | 1                |                   |                    |             |              |
| High-grade B-cell vs. Unspecified B-cell                          | -0.24070168 | 1                |                   |                    |             |              |
| Intermediate & triple-hit B-cell vs. Unspecified B-cell           | -0.88076828 | 1                |                   |                    |             |              |
| IVL vs. Unspecified B-cell                                        | 0.10704856  | 1                |                   |                    |             |              |
| lymphoplasmacytic vs. Unspecified B-cell                          | 1.65879212  | 1                |                   |                    |             |              |
| MALT vs. Unspecified B-cell                                       | -1.16013928 | 1                |                   |                    |             |              |
| Mantle cell vs. Unspecified B-cell                                | 0.43803886  | 1                |                   |                    |             |              |
| Marginal zone vs. Unspecified B-cell                              | 1.72560417  | 1                |                   |                    |             |              |
| Plasma cell leukemia vs. Unspecified B-cell                       | 1.61548422  | 1                |                   |                    |             |              |

**Supplemental Table 7: Analysis of T-cell histologies on (A) OS, (B) treatment 1 to progression, (C) symptom onset to diagnosis, and (D) symptom onset to death periods.**

**7A**

| <b>Overall Survival</b>                                                            |                |                                    |                         |                           |                    |                    |
|------------------------------------------------------------------------------------|----------------|------------------------------------|-------------------------|---------------------------|--------------------|--------------------|
| <b>Types of T-cell lymphoma</b>                                                    | <b>N</b>       | <b>Median (months)</b>             | <b>Mean (months)</b>    | <b>Standard deviation</b> | <b>Lower bound</b> | <b>Upper bound</b> |
| T lymphoblastic lymphoma/leukemia                                                  | 3              | 10                                 | 11.55333333             | 4.356060263               | 1.641212807        | 21.46545386        |
| Peripheral T-cell                                                                  | 7              | 10                                 | 33.96142857             | 47.265002                 | 0                  | 128.4914326        |
| Cutaneous T-cell                                                                   | 4              | 3                                  | 5.625                   | 5.618051264               | 0                  | 16.86110253        |
| Adult T-cell leukemia/lymphoma                                                     | 2              | 45.5                               | 45.5                    | 64.34671709               | 0                  | 174.1934342        |
| Extranodal NK/T-cell* (lymphoma, nasal type)                                       | 7              | 1                                  | 5.28                    | 5.29683868                | 0                  | 15.87367736        |
| ALCL                                                                               | 2              | 11.65                              | 11.65                   | 10.81873975               | 0                  | 33.2874675         |
| Unspecified T-cell                                                                 | 15             | 10                                 | 16.40666667             | 15.69160224               | 0                  | 47.78987115        |
| Enteropathy-associated T-cell                                                      | 1              | 1.3                                | 1.3                     | N/A                       | N/A                | N/A                |
| N/A = Not applicable                                                               |                |                                    |                         |                           |                    |                    |
| <b>Kruskal-Wallis chi-squared = 8.5973</b>                                         |                | <b>df = 7</b>                      | <b>p value = 0.2829</b> |                           |                    |                    |
|                                                                                    |                |                                    |                         |                           |                    |                    |
| <b>Pair</b>                                                                        | <b>Z score</b> | <b>Bonferroni adjusted p value</b> |                         |                           |                    |                    |
| Extranodal NK/T-cell* (lymphoma, nasal type) vs. Peripheral T-cell                 | -2.29291654    | 0.3059393                          |                         |                           |                    |                    |
| Extranodal NK/T-cell* (lymphoma, nasal type) vs. Unspecified T-cell                | -1.97228658    | 0.6800766                          |                         |                           |                    |                    |
| Adult T-cell leukemia/lymphoma vs. ALCL                                            | -0.18924944    | 1                                  |                         |                           |                    |                    |
| Adult T-cell leukemia/lymphoma vs. Cutaneous T-cell                                | 0.60701787     | 1                                  |                         |                           |                    |                    |
| ALCL vs. Cutaneous T-cell                                                          | 0.82554431     | 1                                  |                         |                           |                    |                    |
| Adult T-cell leukemia/lymphoma vs. Enteropathy-associated T-cell                   | 0.87562197     | 1                                  |                         |                           |                    |                    |
| ALCL vs. Enteropathy-associated T-cell                                             | 1.03014349     | 1                                  |                         |                           |                    |                    |
| Cutaneous T-cell vs. Enteropathy-associated T-cell                                 | 0.48900178     | 1                                  |                         |                           |                    |                    |
| Adult T-cell leukemia/lymphoma vs. Extranodal NK/T-cell* (lymphoma, nasal type)    | 0.81301126     | 1                                  |                         |                           |                    |                    |
| ALCL vs. Extranodal NK/T-cell* (lymphoma, nasal type)                              | 1.04904678     | 1                                  |                         |                           |                    |                    |
| Cutaneous T-cell vs. Extranodal NK/T-cell* (lymphoma, nasal type)                  | 0.20129177     | 1                                  |                         |                           |                    |                    |
| Enteropathy-associated T-cell vs. Extranodal NK/T-cell* (lymphoma, nasal type)     | -0.39339254    | 1                                  |                         |                           |                    |                    |
| Adult T-cell leukemia/lymphoma vs. Peripheral T-cell                               | -0.71559977    | 1                                  |                         |                           |                    |                    |
| ALCL vs. Peripheral T-cell                                                         | -0.47956424    | 1                                  |                         |                           |                    |                    |
| Cutaneous T-cell vs. Peripheral T-cell                                             | -1.75411402    | 1                                  |                         |                           |                    |                    |
| Enteropathy-associated T-cell vs. Peripheral T-cell                                | -1.53985082    | 1                                  |                         |                           |                    |                    |
| Adult T-cell leukemia/lymphoma vs. T lymphoblastic lymphoma/leukemia               | -0.16124236    | 1                                  |                         |                           |                    |                    |
| ALCL vs. T lymphoblastic lymphoma/leukemia                                         | 0.04606342     | 1                                  |                         |                           |                    |                    |
| Cutaneous T-cell vs. T lymphoblastic lymphoma/leukemia                             | -0.88101577    | 1                                  |                         |                           |                    |                    |
| Enteropathy-associated T-cell vs. T lymphoblastic lymphoma/leukemia                | -1.0562111     | 1                                  |                         |                           |                    |                    |
| Extranodal NK/T-cell* (lymphoma, nasal type) vs. T lymphoblastic lymphoma/leukemia | -1.15793811    | 1                                  |                         |                           |                    |                    |
| Peripheral T-cell vs. T lymphoblastic lymphoma/leukemia                            | 0.61814741     | 1                                  |                         |                           |                    |                    |
| Adult T-cell leukemia/lymphoma vs. Unspecified T-cell                              | -0.333342      | 1                                  |                         |                           |                    |                    |
| ALCL vs. Unspecified T-cell                                                        | -0.08193882    | 1                                  |                         |                           |                    |                    |
| Cutaneous T-cell vs. Unspecified T-cell                                            | -1.38009643    | 1                                  |                         |                           |                    |                    |
| Enteropathy-associated T-cell vs. Unspecified T-cell                               | -1.28132257    | 1                                  |                         |                           |                    |                    |
| Peripheral T-cell vs. Unspecified T-cell                                           | 0.70526306     | 1                                  |                         |                           |                    |                    |
| T lymphoblastic lymphoma/leukemia vs. Unspecified T-cell                           | -0.16402218    | 1                                  |                         |                           |                    |                    |

# 7B

| Time from Treatment 1 to Progression                                |                |                                    |               |                    |             |             |
|---------------------------------------------------------------------|----------------|------------------------------------|---------------|--------------------|-------------|-------------|
| Types of T-cell lymphoma                                            | N              | Median (months)                    | Mean (months) | Standard deviation | Lower bound | Upper bound |
| Unspecified T-cell                                                  | 3              | 9.4                                | 8.133333333   | 5.608327142        | 0           | 19.34998762 |
| Peripheral T-cell                                                   | 1              | 11                                 | 11            | N/A                | N/A         | N/A         |
| Extranodal NK/T-cell* (lymphoma, nasal type)                        | 1              | 8                                  | 8             | N/A                | N/A         | N/A         |
| T lymphoblastic lymphoma/leukemia                                   | 0              | N/A                                | N/A           | N/A                | N/A         | N/A         |
| Cutaneous T-cell                                                    | 0              | N/A                                | N/A           | N/A                | N/A         | N/A         |
| Adult T-cell leukemia/lymphoma                                      | 0              | N/A                                | N/A           | N/A                | N/A         | N/A         |
| ALCL                                                                | 0              | N/A                                | N/A           | N/A                | N/A         | N/A         |
| Enteropathy-associated T-cell                                       | 0              | N/A                                | N/A           | N/A                | N/A         | N/A         |
| N/A = Not applicable                                                |                |                                    |               |                    |             |             |
| <b>Kruskal-Wallis chi-squared = 0.8</b>                             | <b>df = 2</b>  | <b>p value = 0.6703</b>            |               |                    |             |             |
| <b>Pair</b>                                                         | <b>Z score</b> | <b>Bonferroni adjusted p value</b> |               |                    |             |             |
| Extranodal NK/T-cell* (lymphoma, nasal type) vs. Peripheral T-cell  | -0.8944272     | 0.5566401                          |               |                    |             |             |
| Extranodal NK/T-cell* (lymphoma, nasal type) vs. Unspecified T-cell | -0.5477226     | 0.8758236                          |               |                    |             |             |
| Peripheral T-cell vs. Unspecified T-cell                            | 0.5477226      | 0.8758236                          |               |                    |             |             |

| Time from Symptom Onset to Diagnosis                                               |            |                             |                         |                    |             |             |
|------------------------------------------------------------------------------------|------------|-----------------------------|-------------------------|--------------------|-------------|-------------|
| Types of T-cell lymphoma                                                           | N          | Median (months)             | Mean (months)           | Standard deviation | Lower bound | Upper bound |
| Extranodal NK/T-cell* (lymphoma, nasal type)                                       | 5          | 2                           | 2.466666667             | 2.216228027        | 0           | 6.89912272  |
| Peripheral T-cell                                                                  | 2          | 6.125                       | 6.125                   | 8.308504679        | 0           | 22.74200936 |
| Unspecified T-cell                                                                 | 2          | 4                           | 4                       | 2.828427125        | 0           | 9.656854249 |
| T lymphoblastic lymphoma/leukemia                                                  | 1          | 0.9                         | 0.9                     | N/A                | N/A         | N/A         |
| Cutaneous T-cell                                                                   | 1          | 2                           | 2                       | N/A                | N/A         | N/A         |
| Adult T-cell leukemia/lymphoma                                                     | 1          | 6                           | 6                       | N/A                | N/A         | N/A         |
| Enteropathy-associated T-cell                                                      | 1          | 0                           | 0                       | N/A                | N/A         | N/A         |
| ALCL                                                                               | 0          | N/A                         | N/A                     | N/A                | N/A         | N/A         |
| N/A = Not applicable                                                               |            |                             |                         |                    |             |             |
| <b>Kruskal-Wallis chi-squared = 4.6854</b>                                         |            | <b>df = 6</b>               | <b>p value = 0.5847</b> |                    |             |             |
| Pair                                                                               | Z score    | Bonferroni adjusted p value |                         |                    |             |             |
| Adult T-cell leukemia/lymphoma vs. Enteropathy-associated T-cell                   | 1.8359702  | 0.6968017                   |                         |                    |             |             |
| Enteropathy-associated T-cell vs. Unspecified T-cell                               | -1.6959966 | 0.9438085                   |                         |                    |             |             |
| Adult T-cell leukemia/lymphoma vs. Cutaneous T-cell                                | 0.7343881  | 1                           |                         |                    |             |             |
| Cutaneous T-cell vs. Enteropathy-associated T-cell                                 | 1.1015821  | 1                           |                         |                    |             |             |
| Adult T-cell leukemia/lymphoma vs. Extranodal NK/T-cell* (lymphoma, nasal type)    | 0.9480909  | 1                           |                         |                    |             |             |
| Cutaneous T-cell vs. Extranodal NK/T-cell* (lymphoma, nasal type)                  | 0          | 1                           |                         |                    |             |             |
| Enteropathy-associated T-cell vs. Extranodal NK/T-cell* (lymphoma, nasal type)     | -1.4221364 | 1                           |                         |                    |             |             |
| Adult T-cell leukemia/lymphoma vs. Peripheral T-cell                               | 0.7419985  | 1                           |                         |                    |             |             |
| Cutaneous T-cell vs. Peripheral T-cell                                             | -0.1059998 | 1                           |                         |                    |             |             |
| Enteropathy-associated T-cell vs. Peripheral T-cell                                | -1.3779972 | 1                           |                         |                    |             |             |
| Extranodal NK/T-cell* (lymphoma, nasal type) vs. Peripheral T-cell                 | -0.1551678 | 1                           |                         |                    |             |             |
| Adult T-cell leukemia/lymphoma vs. T lymphoblastic lymphoma/leukemia               | 1.2851791  | 1                           |                         |                    |             |             |
| Cutaneous T-cell vs. T lymphoblastic lymphoma/leukemia                             | 0.5507911  | 1                           |                         |                    |             |             |
| Enteropathy-associated T-cell vs. T lymphoblastic lymphoma/leukemia                | -0.5507911 | 1                           |                         |                    |             |             |
| Extranodal NK/T-cell* (lymphoma, nasal type) vs. T lymphoblastic lymphoma/leukemia | 0.7110682  | 1                           |                         |                    |             |             |
| Peripheral T-cell vs. T lymphoblastic lymphoma/leukemia                            | 0.7419985  | 1                           |                         |                    |             |             |
| Adult T-cell leukemia/lymphoma vs. Unspecified T-cell                              | 0.4239992  | 1                           |                         |                    |             |             |
| Cutaneous T-cell vs. Unspecified T-cell                                            | -0.4239992 | 1                           |                         |                    |             |             |
| Extranodal NK/T-cell* (lymphoma, nasal type) vs. Unspecified T-cell                | -0.6206712 | 1                           |                         |                    |             |             |
| Peripheral T-cell vs. Unspecified T-cell                                           | -0.3894681 | 1                           |                         |                    |             |             |
| T lymphoblastic lymphoma/leukemia vs. Unspecified T-cell                           | -1.0599979 | 1                           |                         |                    |             |             |



| Time from Symptom Onset to Death                                                 |                |                                    |               |                    |             |             |
|----------------------------------------------------------------------------------|----------------|------------------------------------|---------------|--------------------|-------------|-------------|
| Types of T-cell lymphoma                                                         | N              | Median (months)                    | Mean (months) | Standard deviation | Lower bound | Upper bound |
| T lymphoblastic lymphoma/leukemia                                                | 3              | 10                                 | 11.85333333   | 5.461184243        | 0.930964848 | 22.77570182 |
| Peripheral T-cell                                                                | 7              | 19                                 | 35.71142857   | 47.02980878        | 0           | 129.7710461 |
| Cutaneous T-cell                                                                 | 4              | 4.25                               | 6.125         | 5.390964663        | 0           | 16.90692933 |
| Adult T-cell leukemia/lymphoma                                                   | 2              | 48.5                               | 48.5          | 60.1040764         | 0           | 168.7081528 |
| Extranodal NK/T-cell* (lymphoma, nasal type)                                     | 7              | 5.996666667                        | 7.041904762   | 6.530582714        | 0           | 20.10907019 |
| ALCL                                                                             | 2              | 11.65                              | 11.65         | 10.81873375        | 0           | 33.2874675  |
| Unspecified T-cell                                                               | 18             | 10                                 | 14.83888889   | 14.78946918        | 0           | 44.41782725 |
| Enteropathy-associated T-cell                                                    | 1              | 1.3                                | 1.3           | N/A                | N/A         | N/A         |
| N/A = Not applicable                                                             |                |                                    |               |                    |             |             |
| <b>Kruskal-Wallis chi-squared = 8.489</b>                                        | <b>df = 7</b>  | <b>p value = 0.2915</b>            |               |                    |             |             |
|                                                                                  |                |                                    |               |                    |             |             |
| <b>Pair</b>                                                                      | <b>Z score</b> | <b>Bonferroni adjusted p value</b> |               |                    |             |             |
| Extranodal NK/T-cell* (lymphoma, nasal type) - Peripheral T-cell                 | -2.08303345    | 0.5214744                          |               |                    |             |             |
| Cutaneous T-cell - Peripheral T-cell                                             | -1.84559896    | 0.9093064                          |               |                    |             |             |
| Enteropathy-associated T-cell - Peripheral T-cell                                | -1.80564457    | 0.9396343                          |               |                    |             |             |
| Adult T-cell leukemia/lymphoma - ALCL                                            | 0.43082398     | 1                                  |               |                    |             |             |
| Adult T-cell leukemia/lymphoma - Cutaneous T-cell                                | 1.2776003      | 1                                  |               |                    |             |             |
| ALCL - Cutaneous T-cell                                                          | 0.78012762     | 1                                  |               |                    |             |             |
| Adult T-cell leukemia/lymphoma - Enteropathy-associated T-cell                   | 1.53498026     | 1                                  |               |                    |             |             |
| ALCL - Enteropathy-associated T-cell                                             | 1.18321365     | 1                                  |               |                    |             |             |
| Cutaneous T-cell - Enteropathy-associated T-cell                                 | 0.69186168     | 1                                  |               |                    |             |             |
| Adult T-cell leukemia/lymphoma - Extranodal NK/T-cell* (lymphoma, nasal type)    | 1.32588394     | 1                                  |               |                    |             |             |
| ALCL - Extranodal NK/T-cell* (lymphoma, nasal type)                              | 0.78855203     | 1                                  |               |                    |             |             |
| Cutaneous T-cell - Extranodal NK/T-cell* (lymphoma, nasal type)                  | -0.06918207    | 1                                  |               |                    |             |             |
| Enteropathy-associated T-cell - Extranodal NK/T-cell* (lymphoma, nasal type)     | -0.76412785    | 1                                  |               |                    |             |             |
| Adult T-cell leukemia/lymphoma - Peripheral T-cell                               | -0.06280503    | 1                                  |               |                    |             |             |
| ALCL - Peripheral T-cell                                                         | -0.60013694    | 1                                  |               |                    |             |             |
| Adult T-cell leukemia/lymphoma - T lymphoblastic lymphoma/leukemia               | 0.38613602     | 1                                  |               |                    |             |             |
| ALCL - T lymphoblastic lymphoma/leukemia                                         | -0.085808      | 1                                  |               |                    |             |             |
| Cutaneous T-cell - T lymphoblastic lymphoma/leukemia                             | -0.98714175    | 1                                  |               |                    |             |             |
| Enteropathy-associated T-cell - T lymphoblastic lymphoma/leukemia                | -1.32282509    | 1                                  |               |                    |             |             |
| Extranodal NK/T-cell* (lymphoma, nasal type) - T lymphoblastic lymphoma/leukemia | -1.02972798    | 1                                  |               |                    |             |             |
| Peripheral T-cell - T lymphoblastic lymphoma/leukemia                            | 0.58378279     | 1                                  |               |                    |             |             |
| Adult T-cell leukemia/lymphoma - Unspecified T-cell                              | 0.52838362     | 1                                  |               |                    |             |             |
| ALCL - Unspecified T-cell                                                        | -0.04962721    | 1                                  |               |                    |             |             |
| Cutaneous T-cell - Unspecified T-cell                                            | -1.2891424     | 1                                  |               |                    |             |             |
| Enteropathy-associated T-cell - Unspecified T-cell                               | -1.446488      | 1                                  |               |                    |             |             |
| Extranodal NK/T-cell* (lymphoma, nasal type) - Unspecified T-cell                | -1.50243585    | 1                                  |               |                    |             |             |
| Peripheral T-cell - Unspecified T-cell                                           | 0.99720429     | 1                                  |               |                    |             |             |
| T lymphoblastic lymphoma/leukemia - Unspecified T-cell                           | 0.0662942      | 1                                  |               |                    |             |             |

**Supplemental Table 8:** Analysis of peripheral nerve involvements on (A) OS, (B) treatment 1 to progression, (C) symptom onset to diagnosis, and (D) symptom onset to death periods.

**8A**

| Overall Survival                                                   |                                |                     |               |                    |             |             |             |
|--------------------------------------------------------------------|--------------------------------|---------------------|---------------|--------------------|-------------|-------------|-------------|
| Category & Types of Peripheral Nerves                              | N                              | Median (months)     | Mean (months) | Standard deviation | Lower bound | Upper bound |             |
| <i>Cranial nerves</i>                                              | Cranial nerves                 | 106                 | 10            | 24.7682075         | 40.88375262 | 0           | 91.76750524 |
|                                                                    | Brachial plexus                | 99                  | 7             | 20.3367677         | 33.9720242  | 0           | 74.9440484  |
| <i>Neural plexus</i>                                               | Lumbosacral plexus             | 114                 | 8.52          | 24.6679825         | 40.34197924 | 0           | 89.20395848 |
|                                                                    | Unspecified plexus             | 114                 | 8.52          | 24.6679825         | 40.34197924 | 0           | 89.20395848 |
| <i>Spinal nerves</i>                                               | Cervical nerve roots           | 42                  | 4             | 10.7380952         | 20.83334759 | 0           | 45.66669518 |
|                                                                    | Thoracic nerve roots           | 29                  | 5             | 10.9420690         | 19.43490773 | 0           | 43.86981546 |
|                                                                    | Lumbar & sacral nerve roots    | 57                  | 7.56          | 16.6591228         | 21.0904757  | 0           | 49.7409514  |
|                                                                    | Unspecified spinal nerve roots | 33                  | 10            | 17.1715152         | 31.4654133  | 0           | 72.9108266  |
| <i>Peripheral nerves</i>                                           | Distal upper extremity nerves  | 27                  | 5             | 9.7814815          | 18.06786431 | 0           | 41.13572862 |
|                                                                    | Distal lower extremity nerves  | 114                 | 6.35          | 21.2475439         | 36.34646557 | 0           | 79.04091314 |
|                                                                    | Unspecified peripheral nerves  | 74                  | 10            | 14.3059459         | 18.40349921 | 0           | 46.80699843 |
| Kruskal-Wallis chi-squared = 49.824                                | df = 10                        | p value = 0.00602   |               |                    |             |             |             |
|                                                                    |                                | Bonferroni adjusted |               |                    |             |             |             |
| Pair                                                               | Z score                        | p value             |               |                    |             |             |             |
| Cervical nerve roots vs. Unspecified peripheral nerves             | -3.72466713                    | 0.00537626          |               |                    |             |             |             |
| Distal upper extremities nerves vs. Unspecified peripheral nerves  | -3.18487216                    | 0.03982494          |               |                    |             |             |             |
| Cervical nerve roots vs. Cranial nerves                            | -2.75961929                    | 0.15913908          |               |                    |             |             |             |
| Thoracic nerve roots vs. Unspecified peripheral nerves             | -2.73253128                    | 0.17283688          |               |                    |             |             |             |
| Cervical nerve roots vs. Lumbosacral plexus                        | -2.70501651                    | 0.18782773          |               |                    |             |             |             |
| Cervical nerve roots vs. Unspecified plexus                        | -2.70501651                    | 0.18782773          |               |                    |             |             |             |
| Cervical nerve roots vs. Unspecified spinal nerve roots            | -2.64839498                    | 0.22241282          |               |                    |             |             |             |
| Cervical nerve roots vs. Lumbar & sacral nerve roots               | -2.40797836                    | 0.44113112          |               |                    |             |             |             |
| Distal upper extremities nerves vs. Unspecified spinal nerve roots | -2.36055961                    | 0.5018031           |               |                    |             |             |             |
| Distal lower extremity nerves vs. Unspecified peripheral nerves    | -2.32158588                    | 0.55701923          |               |                    |             |             |             |
| Cranial nerves vs. Distal upper extremities nerves                 | 2.31779462                     | 0.56266336          |               |                    |             |             |             |
| Brachial plexus vs. Cervical nerve roots                           | 2.30035881                     | 0.58926726          |               |                    |             |             |             |
| Distal upper extremities nerves vs. Lumbosacral plexus             | -2.26480746                    | 0.64675487          |               |                    |             |             |             |
| Distal upper extremities nerves vs. Unspecified plexus             | -2.26480746                    | 0.64675487          |               |                    |             |             |             |
| Brachial plexus vs. Cranial nerves                                 | -0.569152                      | 1                   |               |                    |             |             |             |
| Brachial plexus vs. Distal lower extremity nerves                  | 0.38836457                     | 1                   |               |                    |             |             |             |
| Cervical nerve roots vs. Distal lower extremity nerves             | -2.06645094                    | 1                   |               |                    |             |             |             |
| Cranial nerves vs. Distal lower extremity nerves                   | 0.96461306                     | 1                   |               |                    |             |             |             |
| Brachial plexus vs. Distal upper extremities nerves                | 1.93494226                     | 1                   |               |                    |             |             |             |
| Cervical nerve roots vs. Distal upper extremities nerves           | -0.01421201                    | 1                   |               |                    |             |             |             |
| Distal lower extremity nerves vs. Distal upper extremities nerves  | 1.72637054                     | 1                   |               |                    |             |             |             |
| Brachial plexus vs. Lumbar & sacral nerve roots                    | -0.39736229                    | 1                   |               |                    |             |             |             |
| Cranial nerves vs. Lumbar & sacral nerve roots                     | 0.08207385                     | 1                   |               |                    |             |             |             |
| Distal lower extremity nerves vs. Lumbar & sacral nerve roots      | -0.71922628                    | 1                   |               |                    |             |             |             |
| Distal upper extremities nerves vs. Lumbar & sacral nerve roots    | -2.08097748                    | 1                   |               |                    |             |             |             |
| Brachial Plexus vs. Lumbosacral plexus                             | -0.47065279                    | 1                   |               |                    |             |             |             |
| Cranial nerves vs. Lumbosacral plexus                              | 0.11036353                     | 1                   |               |                    |             |             |             |
| Distal lower extremity nerves vs. Lumbosacral plexus               | -0.87021819                    | 1                   |               |                    |             |             |             |
| Lumbar & sacral nerve roots vs. Lumbosacral plexus                 | 0.00869611                     | 1                   |               |                    |             |             |             |
| Brachial plexus vs. Thoracic nerve roots                           | 1.43347477                     | 1                   |               |                    |             |             |             |
| Cervical nerve roots vs. Thoracic nerve roots                      | -0.50087593                    | 1                   |               |                    |             |             |             |
| Cranial nerves vs. Thoracic nerve roots                            | 1.82391454                     | 1                   |               |                    |             |             |             |
| Distal lower extremity nerves vs. Thoracic nerve roots             | 1.21200941                     | 1                   |               |                    |             |             |             |
| Distal upper extremities nerves vs. Thoracic nerve roots           | -0.43908295                    | 1                   |               |                    |             |             |             |
| Lumbar & sacral nerve roots vs. Thoracic nerve roots               | 1.61663893                     | 1                   |               |                    |             |             |             |
| Lumbosacral plexus vs. Thoracic nerve roots                        | 1.76621913                     | 1                   |               |                    |             |             |             |
| Brachial plexus vs. Unspecified Peripheral nerves                  | -1.92599532                    | 1                   |               |                    |             |             |             |
| Cranial nerves vs. Unspecified Peripheral nerves                   | -1.4286572                     | 1                   |               |                    |             |             |             |
| Lumbar & sacral nerve roots vs. Unspecified Peripheral nerves      | -1.30453549                    | 1                   |               |                    |             |             |             |
| Lumbosacral plexus vs. Unspecified Peripheral nerves               | -1.54947426                    | 1                   |               |                    |             |             |             |
| Brachial plexus vs. Unspecified plexus                             | -0.47065279                    | 1                   |               |                    |             |             |             |
| Cranial nerves vs. Unspecified plexus                              | 0.11036353                     | 1                   |               |                    |             |             |             |
| Distal lower extremity nerves vs. Unspecified plexus               | -0.87021819                    | 1                   |               |                    |             |             |             |
| Lumbar & sacral nerve roots vs. Unspecified plexus                 | 0.00869611                     | 1                   |               |                    |             |             |             |
| Lumbosacral plexus vs. Unspecified plexus                          | 0                              | 1                   |               |                    |             |             |             |
| Thoracic nerve roots vs. Unspecified plexus                        | -1.76621913                    | 1                   |               |                    |             |             |             |
| Unspecified peripheral nerves vs. Unspecified plexus               | 1.54947426                     | 1                   |               |                    |             |             |             |
| Brachial plexus vs. Unspecified spinal nerve roots                 | -0.95749285                    | 1                   |               |                    |             |             |             |
| Cranial nerves vs. Unspecified spinal nerve roots                  | -0.56643685                    | 1                   |               |                    |             |             |             |
| Distal lower extremity nerves vs. Unspecified spinal nerve roots   | -1.22964552                    | 1                   |               |                    |             |             |             |
| Lumbar & sacral nerve roots vs. Unspecified spinal nerve roots     | -0.57783339                    | 1                   |               |                    |             |             |             |
| Lumbosacral plexus vs. Unspecified spinal nerve roots              | -0.64654765                    | 1                   |               |                    |             |             |             |
| Thoracic nerve roots vs. Unspecified spinal nerve roots            | -1.94530545                    | 1                   |               |                    |             |             |             |
| Unspecified peripheral nerves vs. Unspecified spinal nerve roots   | 0.4944714                      | 1                   |               |                    |             |             |             |
| Unspecified plexus vs. Unspecified spinal nerve roots              | -0.64654765                    | 1                   |               |                    |             |             |             |

| Time from Treatment 1 to Progression                               |                                |                             |                   |                    |             |             |             |
|--------------------------------------------------------------------|--------------------------------|-----------------------------|-------------------|--------------------|-------------|-------------|-------------|
| Category & Types of Peripheral Nerves                              | N                              | Median (months)             | Mean (months)     | Standard deviation | Lower bound | Upper bound |             |
| <i>Cranial nerves</i>                                              | Cranial nerves                 | 25                          | 9.4               | 16.042             | 14.24669318 | 0           | 37.89338637 |
| <i>Neural plexus</i>                                               | Brachial plexus                | 23                          | 36                | 22.0326087         | 15.66051497 | 4.678870052 | 67.32102995 |
|                                                                    | Lumbosacral plexus             | 36                          | 18.9              | 19.71388889        | 14.81415159 | 0           | 48.52830318 |
| <i>Spinal nerves</i>                                               | Unspecified plexus             | 7                           | 6.4               | 6.4                | 9.59342E-16 | 6.4         | 6.4         |
|                                                                    | Cervical nerve roots           | 6                           | 3                 | 3.375              | 2.200852108 | 0           | 7.401704215 |
|                                                                    | Thoracic nerve roots           | 3                           | 6                 | 5                  | 1.732050808 | 2.535898385 | 9.464101615 |
|                                                                    | Lumbar & sacral nerve roots    | 10                          | 6                 | 13.783             | 23.65665236 | 0           | 53.31330473 |
| <i>Peripheral nerves</i>                                           | Unspecified spinal nerve roots | 5                           | 11                | 7.642              | 4.696894719 | 1.606210562 | 20.39378944 |
|                                                                    | Distal upper extremity nerves  | 1                           | 8                 | 8                  | N/A         | N/A         | N/A         |
|                                                                    | Distal lower extremity nerves  | 30                          | 11                | 16.58              | 12.20538262 | 0           | 35.41036524 |
| Unspecified peripheral nerves                                      | 13                             | 9.4                         | 10.41538462       | 5.468980123        | 0           | 20.33796025 |             |
| N/A = Not applicable                                               |                                |                             |                   |                    |             |             |             |
| Kruskal-Wallis chi-squared = 21.558                                |                                | df = 10                     | p value = 0.01572 |                    |             |             |             |
| Pair                                                               | Z score                        | Bonferroni adjusted p value |                   |                    |             |             |             |
| Brachial plexus vs. Cervical nerve roots                           | 3.25377157                     | 0.03131805                  |                   |                    |             |             |             |
| Cervical nerve roots vs. Lumbosacral plexus                        | -3.22123907                    | 0.03510035                  |                   |                    |             |             |             |
| Cervical nerve roots vs. Distal lower extremity nerves             | -3.06746997                    | 0.05936677                  |                   |                    |             |             |             |
| Cervical nerve roots vs. Cranial nerves                            | -2.64487963                    | 0.22466354                  |                   |                    |             |             |             |
| Cervical nerve roots vs. Unspecified peripheral nerves             | -2.19854113                    | 0.76754059                  |                   |                    |             |             |             |
| Brachial plexus vs. Lumbar & sacral nerve roots                    | 2.19076527                     | 0.78289153                  |                   |                    |             |             |             |
| Lumbar & sacral nerve roots vs. Lumbosacral plexus                 | -2.1224255                     | 0.92955563                  |                   |                    |             |             |             |
| Brachial plexus vs. Cranial nerves                                 | 1.0007963                      | 1                           |                   |                    |             |             |             |
| Brachial plexus vs. Distal lower extremity nerves                  | 0.43213429                     | 1                           |                   |                    |             |             |             |
| Cranial nerves vs. Distal lower extremity nerves                   | -0.62551593                    | 1                           |                   |                    |             |             |             |
| Brachial plexus vs. Distal upper extremities nerves                | 0.52857918                     | 1                           |                   |                    |             |             |             |
| Cervical nerve roots vs. Distal upper extremities nerves           | -0.88104013                    | 1                           |                   |                    |             |             |             |
| Cranial nerves vs. Distal upper extremities nerves                 | 0.24592146                     | 1                           |                   |                    |             |             |             |
| Distal lower extremity nerves vs. Distal upper extremities nerves  | 0.41334949                     | 1                           |                   |                    |             |             |             |
| Cervical nerve roots vs. Lumbar & sacral nerve roots               | -1.28147399                    | 1                           |                   |                    |             |             |             |
| Cranial nerves vs. Lumbar & sacral nerve roots                     | 1.44501055                     | 1                           |                   |                    |             |             |             |
| Distal lower extremity nerves vs. Lumbar & sacral nerve roots      | 1.94459022                     | 1                           |                   |                    |             |             |             |
| Distal upper extremities nerves vs. Lumbar & sacral nerve roots    | 0.27639143                     | 1                           |                   |                    |             |             |             |
| Brachial plexus vs. Lumbosacral plexus                             | 0.26652966                     | 1                           |                   |                    |             |             |             |
| Cranial nerves vs. Lumbosacral plexus                              | -0.83739636                    | 1                           |                   |                    |             |             |             |
| Distal lower extremity nerves vs. Lumbosacral plexus               | -0.19667208                    | 1                           |                   |                    |             |             |             |
| Distal upper extremities nerves vs. Lumbosacral plexus             | -0.46242227                    | 1                           |                   |                    |             |             |             |
| Brachial plexus vs. Thoracic nerve roots                           | 2.04442288                     | 1                           |                   |                    |             |             |             |
| Cervical nerve roots vs. Thoracic nerve roots                      | -0.35198134                    | 1                           |                   |                    |             |             |             |
| Cranial nerves vs. Thoracic nerve roots                            | 1.56058857                     | 1                           |                   |                    |             |             |             |
| Distal lower extremity nerves vs. Thoracic nerve roots             | 1.85445106                     | 1                           |                   |                    |             |             |             |
| Distal upper extremities nerves vs. Thoracic nerve roots           | 0.6085939                      | 1                           |                   |                    |             |             |             |
| Lumbar & sacral nerve roots vs. Thoracic nerve roots               | 0.62738229                     | 1                           |                   |                    |             |             |             |
| Lumbosacral plexus vs. Thoracic nerve roots                        | 1.94956792                     | 1                           |                   |                    |             |             |             |
| Brachial plexus vs. Unspecified peripheral nerves                  | 1.17148986                     | 1                           |                   |                    |             |             |             |
| Cranial nerves vs. Unspecified peripheral nerves                   | 0.34315339                     | 1                           |                   |                    |             |             |             |
| Distal lower extremity nerves vs. Unspecified peripheral nerves    | 0.86351294                     | 1                           |                   |                    |             |             |             |
| Distal upper extremities nerves vs. Unspecified peripheral nerves  | -0.12859923                    | 1                           |                   |                    |             |             |             |
| Lumbar & sacral nerve roots vs. Unspecified peripheral nerves      | -1.00645059                    | 1                           |                   |                    |             |             |             |
| Lumbosacral plexus vs. Unspecified peripheral nerves               | 1.03638094                     | 1                           |                   |                    |             |             |             |
| Thoracic nerve roots vs. Unspecified peripheral nerves             | -1.30551283                    | 1                           |                   |                    |             |             |             |
| Brachial plexus vs. Unspecified plexus                             | 1.78502785                     | 1                           |                   |                    |             |             |             |
| Cervical nerve roots vs. Unspecified plexus                        | -1.29602963                    | 1                           |                   |                    |             |             |             |
| Cranial nerves vs. Unspecified plexus                              | 1.12572308                     | 1                           |                   |                    |             |             |             |
| Distal lower extremity nerves vs. Unspecified plexus               | 1.55037329                     | 1                           |                   |                    |             |             |             |
| Distal upper extremities nerves vs. Unspecified plexus             | 0.21569512                     | 1                           |                   |                    |             |             |             |
| Lumbar & sacral nerve roots vs. Unspecified plexus                 | -0.1203193                     | 1                           |                   |                    |             |             |             |
| Lumbosacral plexus vs. Unspecified plexus                          | 1.69310771                     | 1                           |                   |                    |             |             |             |
| Thoracic nerve roots vs. Unspecified plexus                        | -0.68421894                    | 1                           |                   |                    |             |             |             |
| Unspecified peripheral nerves vs. Unspecified plexus               | 0.77652708                     | 1                           |                   |                    |             |             |             |
| Brachial plexus vs. Unspecified spinal nerve roots                 | 1.46366125                     | 1                           |                   |                    |             |             |             |
| Cervical nerve roots vs. Unspecified spinal nerve roots            | -1.27055284                    | 1                           |                   |                    |             |             |             |
| Cranial nerves vs. Unspecified spinal nerve roots                  | 0.88399188                     | 1                           |                   |                    |             |             |             |
| Distal lower extremity nerves vs. Unspecified spinal nerve roots   | 1.24720308                     | 1                           |                   |                    |             |             |             |
| Distal upper extremities nerves vs. Unspecified spinal nerve roots | 0.16639277                     | 1                           |                   |                    |             |             |             |
| Lumbar & sacral nerve roots vs. Unspecified spinal nerve roots     | -0.19646375                    | 1                           |                   |                    |             |             |             |
| Lumbosacral plexus vs. Unspecified spinal nerve roots              | 1.36419144                     | 1                           |                   |                    |             |             |             |
| Thoracic nerve roots vs. Unspecified spinal nerve roots            | -0.71268229                    | 1                           |                   |                    |             |             |             |
| Unspecified peripheral nerves vs. Unspecified spinal nerve roots   | 0.59997529                     | 1                           |                   |                    |             |             |             |
| Unspecified plexus vs. Unspecified spinal nerve roots              | -0.08251123                    | 1                           |                   |                    |             |             |             |

| Time from Symptom Onset to Diagnosis                              |                                |                                    |                         |               |                    |             |             |
|-------------------------------------------------------------------|--------------------------------|------------------------------------|-------------------------|---------------|--------------------|-------------|-------------|
| Category & Types of Peripheral Nerves                             |                                | N                                  | Median (months)         | Mean (months) | Standard deviation | Lower bound | Upper bound |
| Cranial nerves                                                    | Cranial nerves                 | 26                                 | 3                       | 9.014102564   | 18.82874852        | 0           | 40.65749705 |
|                                                                   | Brachial plexus                | 40                                 | 3                       | 8.08875       | 13.67470651        | 0           | 30.34941302 |
| Neural plexus                                                     | Lumbosacral plexus             | 42                                 | 3                       | 9.266666667   | 20.28016807        | 0           | 43.56033613 |
|                                                                   | Unspecified plexus             | 0                                  | N/A                     | N/A           | N/A                | N/A         | N/A         |
| Spinal nerves                                                     | Cervical nerve roots           | 13                                 | 5                       | 11.92307692   | 16.57036279        | 0           | 38.14072559 |
|                                                                   | Thoracic nerve roots           | 8                                  | 5.5                     | 29            | 42.02380278        | 0           | 89.54760556 |
|                                                                   | Lumbar & sacral nerve roots    | 17                                 | 3                       | 10.70588235   | 23.05906738        | 0           | 49.11813475 |
|                                                                   | Unspecified spinal nerve roots | 0                                  | N/A                     | N/A           | N/A                | N/A         | N/A         |
| Peripheral nerves                                                 | Distal upper extremity nerves  | 15                                 | 3                       | 9.893333333   | 24.02949576        | 0           | 51.05899153 |
|                                                                   | Distal lower extremity nerves  | 42                                 | 3                       | 9.526984127   | 17.95227071        | 0           | 38.90454143 |
|                                                                   | Unspecified peripheral nerves  | 3                                  | 6                       | 5.1           | 3.439476704        | 0           | 12.87895341 |
| N/A = Not applicable                                              |                                |                                    |                         |               |                    |             |             |
| <b>Kruskal-Wallis chi-squared = 2.9153</b>                        |                                | <b>df = 10</b>                     | <b>p value = 0.9396</b> |               |                    |             |             |
| <b>Pair</b>                                                       | <b>Zscore</b>                  | <b>Bonferroni adjusted p value</b> |                         |               |                    |             |             |
| Brachial plexus vs. Cervical nerve roots                          | -1.019157383                   | 1                                  |                         |               |                    |             |             |
| Brachial plexus vs. Cranial nerves                                | -0.004629407                   | 1                                  |                         |               |                    |             |             |
| Cervical nerve roots vs. Cranial nerves                           | 0.954430849                    | 1                                  |                         |               |                    |             |             |
| Brachial plexus vs. Distal lower extremity nerves                 | -0.001089024                   | 1                                  |                         |               |                    |             |             |
| Cervical nerve roots vs. Distal lower extremity nerves            | 1.024403926                    | 1                                  |                         |               |                    |             |             |
| Cranial nerves vs. Distal lower extremity nerves                  | 0.003708285                    | 1                                  |                         |               |                    |             |             |
| Brachial plexus vs. Distal upper extremities nerves               | 0.171515134                    | 1                                  |                         |               |                    |             |             |
| Cervical nerve roots vs. Distal upper extremities nerves          | 0.995688993                    | 1                                  |                         |               |                    |             |             |
| Cranial nerves vs. Distal upper extremities nerves                | 0.163754027                    | 1                                  |                         |               |                    |             |             |
| Distal lower extremity nerves vs. Distal upper extremities nerves | 0.173439711                    | 1                                  |                         |               |                    |             |             |
| Brachial plexus vs. Lumbar & sacral nerve roots                   | -0.211638901                   | 1                                  |                         |               |                    |             |             |
| Cervical nerve roots vs. Lumbar & sacral nerve roots              | 0.716798069                    | 1                                  |                         |               |                    |             |             |
| Cranial nerves vs. Lumbar & sacral nerve roots                    | -0.192713802                   | 1                                  |                         |               |                    |             |             |
| Distal lower extremity nerves vs. Lumbar & sacral nerve roots     | -0.212320992                   | 1                                  |                         |               |                    |             |             |
| Distal upper extremities nerves vs. Lumbar & sacral nerve roots   | -0.319560746                   | 1                                  |                         |               |                    |             |             |
| Brachial plexus vs. Lumbosacral plexus                            | 0.162264543                    | 1                                  |                         |               |                    |             |             |
| Cervical nerve roots vs. Lumbosacral plexus                       | 1.138113199                    | 1                                  |                         |               |                    |             |             |
| Cranial nerves vs. Lumbosacral plexus                             | 0.14833142                     | 1                                  |                         |               |                    |             |             |
| Distal lower extremity nerves vs. Lumbosacral plexus              | 0.165382881                    | 1                                  |                         |               |                    |             |             |
| Distal upper extremities nerves vs. Lumbosacral plexus            | -0.053458358                   | 1                                  |                         |               |                    |             |             |
| Lumbar & sacral nerve roots vs. Lumbosacral plexus                | 0.337867317                    | 1                                  |                         |               |                    |             |             |
| Brachial plexus vs. Thoracic nerve roots                          | -1.116484017                   | 1                                  |                         |               |                    |             |             |
| Cervical nerve roots vs. Thoracic nerve roots                     | -0.238211558                   | 1                                  |                         |               |                    |             |             |
| Cranial nerves vs. Thoracic nerve roots                           | -1.06663965                    | 1                                  |                         |               |                    |             |             |
| Distal lower extremity nerves vs. Thoracic nerve roots            | -1.120317359                   | 1                                  |                         |               |                    |             |             |
| Distal upper extremities nerves vs. Thoracic nerve roots          | -1.10631323                    | 1                                  |                         |               |                    |             |             |
| Lumbar & sacral nerve roots vs. Thoracic nerve roots              | -0.865635327                   | 1                                  |                         |               |                    |             |             |
| Lumbosacral plexus vs. Thoracic nerve roots                       | -1.213872044                   | 1                                  |                         |               |                    |             |             |
| Brachial plexus vs. Unspecified peripheral nerves                 | -0.348402808                   | 1                                  |                         |               |                    |             |             |
| Cervical nerve roots vs. Unspecified peripheral nerves            | 0.18237389                     | 1                                  |                         |               |                    |             |             |
| Cranial nerves vs. Unspecified peripheral nerves                  | -0.340125158                   | 1                                  |                         |               |                    |             |             |
| Distal lower extremity nerves vs. Unspecified peripheral nerves   | -0.348580401                   | 1                                  |                         |               |                    |             |             |
| Distal upper extremities nerves vs. Unspecified peripheral nerves | -0.411864554                   | 1                                  |                         |               |                    |             |             |
| Lumbar & sacral nerve roots vs. Unspecified peripheral nerves     | -0.235191954                   | 1                                  |                         |               |                    |             |             |
| Lumbosacral plexus vs. Unspecified peripheral nerves              | -0.40896969                    | 1                                  |                         |               |                    |             |             |
| Thoracic nerve roots vs. Unspecified peripheral nerves            | 0.330656                       | 1                                  |                         |               |                    |             |             |

| Time from Symptom Onset to Death                                   |                                |             |                             |               |                    |             |             |
|--------------------------------------------------------------------|--------------------------------|-------------|-----------------------------|---------------|--------------------|-------------|-------------|
| Category & Types of Peripheral Nerves                              |                                | N           | Median (months)             | Mean (months) | Standard deviation | Lower bound | Upper bound |
| Cranial nerves                                                     | Cranial nerves                 | 129         | 10                          | 38.26         | 28.92546267        | 0           | 76.11547314 |
|                                                                    | Brachial plexus                | 103         | 9.996666667                 | 22.69         | 33.91926048        | 0           | 90.52677339 |
| Neural plexus                                                      | Lumbosacral plexus             | 122         | 12                          | 26.24         | 40.34105844        | 0           | 106.9226907 |
|                                                                    | Unspecified plexus             | 27          | 10                          | 10.88         | 1.518358688        | 7.844764105 | 13.91819886 |
| Spinal nerves                                                      | Cervical nerve roots           | 43          | 5                           | 14.08         | 23.64997249        | 0           | 61.38320079 |
|                                                                    | Thoracic nerve roots           | 30          | 5.5                         | 38.31         | 29.34618567        | 0           | 77.00303801 |
|                                                                    | Lumbar & sacral nerve roots    | 62          | 7.78                        | 38.25         | 22.92419097        | 0           | 64.09951097 |
|                                                                    | Unspecified spinal nerve roots | 33          | 10                          | 17.17         | 31.4554133         | 0           | 80.08234175 |
| Peripheral nerves                                                  | Distal upper extremity nerves  | 31          | 5                           | 13.28         | 24.09619209        | 0           | 61.46980353 |
|                                                                    | Distal lower extremity nerves  | 125         | 8                           | 22.58         | 35.86550833        | 0           | 94.30984333 |
|                                                                    | Unspecified peripheral nerves  | 80          | 10                          | 11.09         | 11.43378045        | 0           | 33.95793589 |
| Kruskal-Wallis chi-squared = 33.352                                |                                | df = 10     | p value = 0.1584            |               |                    |             |             |
| Pair                                                               |                                | Z score     | Bonferroni adjusted p value |               |                    |             |             |
| Distal upper extremities nerves vs. Unspecified plexus             |                                | -2.56858453 | 0.2808157                   |               |                    |             |             |
| Cervical nerve roots vs. Unspecified plexus                        |                                | -2.51412714 | 0.3281504                   |               |                    |             |             |
| Brachial plexus vs. Distal upper extremities nerves                |                                | 2.29690882  | 0.5946624                   |               |                    |             |             |
| Distal upper extremities nerves vs. Lumbosacral plexus             |                                | -2.29141518 | 0.6033338                   |               |                    |             |             |
| Brachial plexus vs. Cervical nerve roots                           |                                | 2.26766473  | 0.6421154                   |               |                    |             |             |
| Cervical nerve roots vs. Lumbosacral plexus                        |                                | -2.26706929 | 0.6431148                   |               |                    |             |             |
| Brachial plexus vs. Cranial nerves                                 |                                | 0.60944676  | 1                           |               |                    |             |             |
| Cervical nerve roots vs. Cranial nerves                            |                                | -1.88079112 | 1                           |               |                    |             |             |
| Brachial plexus vs. Distal lower extremity nerves                  |                                | 0.78640823  | 1                           |               |                    |             |             |
| Cervical nerve roots vs. Distal lower extremity nerves             |                                | -1.73988761 | 1                           |               |                    |             |             |
| Cranial nerves vs. Distal lower extremity nerves                   |                                | 0.19217326  | 1                           |               |                    |             |             |
| Cervical nerve roots vs. Distal upper extremities nerves           |                                | 0.24964284  | 1                           |               |                    |             |             |
| Cranial nerves vs. Distal upper extremities nerves                 |                                | 1.94979701  | 1                           |               |                    |             |             |
| Distal lower extremity nerves vs. Distal upper extremities nerves  |                                | 1.82357256  | 1                           |               |                    |             |             |
| Brachial plexus vs. Lumbar & sacral nerve roots                    |                                | 0.30247953  | 1                           |               |                    |             |             |
| Cervical nerve roots vs. Lumbar & sacral nerve roots               |                                | -1.82962067 | 1                           |               |                    |             |             |
| Cranial nerves vs. Lumbar & sacral nerve roots                     |                                | -0.20649498 | 1                           |               |                    |             |             |
| Distal lower extremity nerves vs. Lumbar & sacral nerve roots      |                                | -0.36070167 | 1                           |               |                    |             |             |
| Distal upper extremities nerves vs. Lumbar & sacral nerve roots    |                                | -1.93808839 | 1                           |               |                    |             |             |
| Brachial plexus vs. Lumbosacral plexus                             |                                | 0.0721824   | 1                           |               |                    |             |             |
| Cranial nerves vs. Lumbosacral plexus                              |                                | -0.56119959 | 1                           |               |                    |             |             |
| Distal lower extremity nerves vs. Lumbosacral plexus               |                                | -0.74640169 | 1                           |               |                    |             |             |
| Lumbar & sacral nerve roots vs. Lumbosacral plexus                 |                                | -0.24980988 | 1                           |               |                    |             |             |
| Brachial plexus vs. Thoracic nerve roots                           |                                | 1.28906142  | 1                           |               |                    |             |             |
| Cervical nerve roots vs. Thoracic nerve roots                      |                                | -0.60653007 | 1                           |               |                    |             |             |
| Cranial nerves vs. Thoracic nerve roots                            |                                | 0.92209766  | 1                           |               |                    |             |             |
| Distal lower extremity nerves vs. Thoracic nerve roots             |                                | 0.80069236  | 1                           |               |                    |             |             |
| Distal upper extremities nerves vs. Thoracic nerve roots           |                                | -0.79303814 | 1                           |               |                    |             |             |
| Lumbar & sacral nerve roots vs. Thoracic nerve roots               |                                | 0.98387546  | 1                           |               |                    |             |             |
| Lumbosacral plexus vs. Thoracic nerve roots                        |                                | 1.26492143  | 1                           |               |                    |             |             |
| Brachial plexus vs. Unspecified peripheral nerves                  |                                | 0.55936367  | 1                           |               |                    |             |             |
| Cervical nerve roots vs. Unspecified peripheral nerves             |                                | -1.73651238 | 1                           |               |                    |             |             |
| Cranial nerves vs. Unspecified peripheral nerves                   |                                | 0.01987302  | 1                           |               |                    |             |             |
| Distal lower extremity nerves vs. Unspecified peripheral nerves    |                                | -0.14870224 | 1                           |               |                    |             |             |
| Distal upper extremities nerves vs. Unspecified peripheral nerves  |                                | -1.8301105  | 1                           |               |                    |             |             |
| Lumbar & sacral nerve roots vs. Unspecified peripheral nerves      |                                | 0.20531038  | 1                           |               |                    |             |             |
| Lumbosacral plexus vs. Unspecified peripheral nerves               |                                | 0.51229717  | 1                           |               |                    |             |             |
| Thoracic nerve roots vs. Unspecified peripheral nerves             |                                | -0.85982011 | 1                           |               |                    |             |             |
| Brachial plexus vs. Unspecified plexus                             |                                | -0.95099977 | 1                           |               |                    |             |             |
| Cranial nerves vs. Unspecified plexus                              |                                | -1.3520748  | 1                           |               |                    |             |             |
| Distal lower extremity nerves vs. Unspecified plexus               |                                | -1.46199754 | 1                           |               |                    |             |             |
| Lumbar & sacral nerve roots vs. Unspecified plexus                 |                                | -1.10259776 | 1                           |               |                    |             |             |
| Lumbosacral plexus vs. Unspecified plexus                          |                                | -1.01217783 | 1                           |               |                    |             |             |
| Thoracic nerve roots vs. Unspecified plexus                        |                                | -1.78324837 | 1                           |               |                    |             |             |
| Unspecified peripheral nerves vs. Unspecified plexus               |                                | -1.29835228 | 1                           |               |                    |             |             |
| Brachial plexus vs. Unspecified spinal nerve roots                 |                                | -0.12989041 | 1                           |               |                    |             |             |
| Cervical nerve roots vs. Unspecified spinal nerve roots            |                                | -1.89131243 | 1                           |               |                    |             |             |
| Cranial nerves vs. Unspecified spinal nerve roots                  |                                | -0.54600795 | 1                           |               |                    |             |             |
| Distal lower extremity nerves vs. Unspecified spinal nerve roots   |                                | -0.66747467 | 1                           |               |                    |             |             |
| Distal upper extremities nerves vs. Unspecified spinal nerve roots |                                | -1.98511661 | 1                           |               |                    |             |             |
| Lumbar & sacral nerve roots vs. Unspecified spinal nerve roots     |                                | -0.34621549 | 1                           |               |                    |             |             |
| Lumbosacral plexus vs. Unspecified spinal nerve roots              |                                | -0.38164253 | 1                           |               |                    |             |             |
| Thoracic nerve roots vs. Unspecified spinal nerve roots            |                                | -1.16314599 | 1                           |               |                    |             |             |
| Unspecified peripheral nerves vs. Unspecified spinal nerve roots   |                                | -0.52850393 | 1                           |               |                    |             |             |
| Unspecified plexus vs. Unspecified spinal nerve roots              |                                | 0.69222283  | 1                           |               |                    |             |             |
